# Supplementary material for: Density Functional Studies on Secondary Amides: Role of Steric Factors in Cis/Trans Isomerization
Source: MDPI journal article supplement (doi:10.3390/molecules23102455), 2018-09-25
Supplement: s1 [file s1]

# Density Functional Studies on Secondary Amides: Role of Steric Factors in cis-trans isomerization

*Balmukund S. Thakkar, John-Sigurd M. Svendsen and Richard A. Engh\**

Department of Chemistry, UiT The Arctic University of Norway, Tromsø-9037, Norway

## Supporting Information

This document provides Cartesian coordinates (in Å) for the optimized geometries of GGMe (N0000) and its substituted derivatives. The geometries include the minimum energy geometries of trans and cis isomers as well as energy barrier geometries (EBGs) for each compound i.e. “*anti*” type with  $\omega$  at  $\sim 120^\circ$  and  $\sim (-120)^\circ$ , and “*syn*” type with  $\omega$  at  $60^\circ$  and  $\sim (-60)^\circ$ .

Each trans/cis geometry is named as: [Compound][t/c]<sup>a</sup>\_[GP/WP]<sup>b</sup>, while each energy barrier geometry is named as [Compound]\_[Anti/Syn]<sup>c</sup>[ $\omega$  value]<sup>d</sup>[GP/WP]<sup>b</sup>

### 1. N0000t\_GP

|   |          |          |          |
|---|----------|----------|----------|
| N | 9.67400  | -6.19120 | 2.11600  |
| C | 9.08180  | -4.97260 | 1.55780  |
| C | 9.11010  | -4.92990 | 0.02620  |
| N | 9.41290  | -6.10200 | -0.58000 |
| C | 9.44090  | -6.22240 | -2.01770 |
| C | 9.91300  | -7.60580 | -2.41440 |
| O | 9.95840  | -7.73010 | -3.75240 |
| C | 10.39010 | -9.01140 | -4.25740 |
| O | 10.20810 | -8.49090 | -1.63650 |
| O | 8.85080  | -3.89370 | -0.58670 |
| H | 9.24860  | -6.44800 | 3.00000  |
| H | 10.67270 | -6.09040 | 2.27080  |
| H | 9.54020  | -4.03750 | 1.90510  |
| H | 8.02520  | -4.92710 | 1.84370  |
| H | 9.60480  | -6.91420 | -0.00060 |
| H | 10.10490 | -5.47140 | -2.46260 |
| H | 8.45080  | -6.04530 | -2.45830 |
| H | 10.35430 | -8.91930 | -5.34200 |
| H | 11.40630 | -9.22810 | -3.92020 |
| H | 9.71800  | -9.80040 | -3.91260 |

<sup>a</sup> t: trans, c: cis; <sup>b</sup> GP: Gas phase; WP: water phase (water dielectric continuum)

<sup>c</sup> Anti: EBG of “*anti*” type; Syn: EBG of “*syn*” type

<sup>d</sup> Among 120, -120, 60 or -60, which value (degrees) is closest from the  $\omega$  of the EBG.

2. N0010t\_GP

|   |          |          |          |
|---|----------|----------|----------|
| N | 9.18410  | -6.30900 | 2.11330  |
| C | 9.15040  | -4.95490 | 1.55340  |
| C | 9.10980  | -4.92840 | 0.01930  |
| N | 9.41490  | -6.10970 | -0.57740 |
| C | 9.37000  | -6.30770 | -2.01560 |
| C | 8.40920  | -7.46310 | -2.29820 |
| O | 7.67010  | -7.24570 | -3.40300 |
| C | 6.75100  | -8.29590 | -3.76820 |
| O | 8.31440  | -8.46420 | -1.61430 |
| O | 8.84920  | -3.88740 | -0.58250 |
| C | 10.79530 | -6.53110 | -2.64980 |
| C | 10.66130 | -6.73590 | -4.17190 |
| C | 11.63170 | -5.26230 | -2.38990 |
| C | 11.50350 | -7.74850 | -2.02410 |
| H | 8.25080  | -6.67790 | 2.26940  |
| H | 9.68090  | -6.34090 | 2.99690  |
| H | 10.06510 | -4.42620 | 1.84360  |
| H | 8.31000  | -4.33800 | 1.89640  |
| H | 9.54010  | -6.90540 | 0.04120  |
| H | 8.95030  | -5.39550 | -2.44690 |
| H | 7.29230  | -9.22430 | -3.96570 |
| H | 6.02990  | -8.46350 | -2.96500 |
| H | 6.25110  | -7.94090 | -4.66870 |
| H | 10.11370 | -5.91170 | -4.64190 |
| H | 11.65680 | -6.78110 | -4.62680 |
| H | 10.14300 | -7.66730 | -4.42110 |
| H | 11.16480 | -4.37680 | -2.83320 |
| H | 11.75420 | -5.07520 | -1.31930 |
| H | 12.62960 | -5.37840 | -2.82750 |
| H | 11.65410 | -7.61650 | -0.94750 |
| H | 10.94180 | -8.67550 | -2.17500 |
| H | 12.49200 | -7.87510 | -2.47970 |

### 3. N0100t\_GP

|   |          |          |          |
|---|----------|----------|----------|
| N | 8.89260  | -6.36140 | 2.01520  |
| C | 9.10300  | -4.97220 | 1.57340  |
| C | 9.10990  | -4.92900 | 0.03410  |
| N | 9.41210  | -6.09850 | -0.58370 |
| C | 9.46020  | -6.19920 | -2.02240 |
| C | 9.65160  | -7.64420 | -2.43460 |
| O | 9.67320  | -7.76070 | -3.77390 |
| C | 9.85910  | -9.09480 | -4.29230 |
| O | 9.77630  | -8.57690 | -1.66650 |
| O | 8.85190  | -3.89800 | -0.59090 |
| C | 10.41000 | -4.36090 | 2.19930  |
| C | 10.32330 | -4.46040 | 3.73960  |
| C | 10.51190 | -2.86780 | 1.82600  |
| C | 11.67110 | -5.10400 | 1.71520  |
| H | 8.98060  | -6.44400 | 3.02260  |
| H | 7.95460  | -6.67340 | 1.77580  |
| H | 8.27880  | -4.30400 | 1.86600  |
| H | 9.60640  | -6.91940 | -0.01880 |
| H | 10.27760 | -5.60020 | -2.44630 |
| H | 8.53970  | -5.80970 | -2.47330 |
| H | 10.81480 | -9.50240 | -3.95500 |
| H | 9.04920  | -9.74720 | -3.95820 |
| H | 9.84590  | -8.98630 | -5.37600 |
| H | 10.41390 | -5.48980 | 4.10460  |
| H | 11.14410 | -3.89470 | 4.19330  |
| H | 9.38410  | -4.03820 | 4.11710  |
| H | 9.65160  | -2.30420 | 2.20480  |
| H | 11.41740 | -2.43880 | 2.27010  |
| H | 10.54960 | -2.71770 | 0.74510  |
| H | 11.83210 | -4.96460 | 0.64120  |
| H | 12.55540 | -4.71750 | 2.23420  |
| H | 11.60460 | -6.17860 | 1.91150  |

#### 4. N0110t\_GP

|   |          |          |          |
|---|----------|----------|----------|
| N | 8.85950  | -6.35310 | 2.01470  |
| C | 9.09740  | -4.96880 | 1.57130  |
| C | 9.10930  | -4.92650 | 0.02730  |
| N | 9.41440  | -6.10780 | -0.58140 |
| C | 9.25780  | -6.32070 | -2.01170 |
| C | 8.16520  | -7.37420 | -2.20750 |
| O | 7.37540  | -7.09360 | -3.26130 |
| C | 6.32620  | -8.04420 | -3.53870 |
| O | 8.01340  | -8.35100 | -1.49800 |
| O | 8.85020  | -3.89120 | -0.58640 |
| C | 10.39640 | -4.37280 | 2.22530  |
| C | 11.65060 | -5.18130 | 1.83940  |
| C | 10.57200 | -2.90390 | 1.78980  |
| C | 10.23460 | -4.39510 | 3.76310  |
| C | 10.60650 | -6.70200 | -2.72950 |
| C | 10.34190 | -6.98680 | -4.22170 |
| C | 11.55840 | -5.49520 | -2.61550 |
| C | 11.25760 | -7.93750 | -2.07720 |
| H | 7.91080  | -6.64490 | 1.79150  |
| H | 8.96550  | -6.44260 | 3.01970  |
| H | 8.27730  | -4.28950 | 1.84870  |
| H | 9.48880  | -6.91490 | 0.03050  |
| H | 8.90400  | -5.37760 | -2.43460 |
| H | 5.80350  | -7.65060 | -4.40960 |
| H | 6.75020  | -9.02830 | -3.75260 |
| H | 5.65070  | -8.12200 | -2.68370 |
| H | 12.52510 | -4.79270 | 2.37330  |
| H | 11.54140 | -6.24040 | 2.09240  |
| H | 11.85930 | -5.11000 | 0.76770  |
| H | 11.46260 | -2.48310 | 2.27030  |
| H | 10.68310 | -2.80690 | 0.70810  |
| H | 9.70990  | -2.29530 | 2.08470  |
| H | 11.05880 | -3.84550 | 4.23020  |
| H | 9.29900  | -3.91570 | 4.07490  |
| H | 10.25950 | -5.40840 | 4.18020  |
| H | 11.29400 | -7.13260 | -4.74330 |
| H | 9.74440  | -7.89210 | -4.37050 |
| H | 9.81700  | -6.15530 | -4.70430 |
| H | 12.51670 | -5.72740 | -3.09350 |
| H | 11.14030 | -4.60870 | -3.10420 |
| H | 11.75710 | -5.24020 | -1.57100 |
| H | 11.51830 | -7.74900 | -1.03070 |
| H | 10.60160 | -8.81300 | -2.11060 |
| H | 12.18400 | -8.18980 | -2.60520 |

5. N011'0t\_GP

|   |          |          |          |
|---|----------|----------|----------|
| N | 9.67810  | -6.27420 | 2.01980  |
| C | 9.05320  | -5.01500 | 1.58120  |
| C | 9.10960  | -4.92790 | 0.03060  |
| N | 9.41320  | -6.10290 | -0.58250 |
| C | 9.54180  | -6.23460 | -2.02270 |
| C | 10.93780 | -6.78390 | -2.31880 |
| O | 11.48380 | -6.20980 | -3.40880 |
| C | 12.79340 | -6.68270 | -3.78590 |
| O | 11.50020 | -7.63600 | -1.65830 |
| O | 8.85110  | -3.89470 | -0.58860 |
| C | 9.55710  | -3.71590 | 2.31370  |
| C | 9.58400  | -3.98370 | 3.83510  |
| C | 8.58650  | -2.54160 | 2.06350  |
| C | 10.97360 | -3.33310 | 1.84010  |
| C | 8.39620  | -7.10650 | -2.66460 |
| C | 8.60830  | -7.20180 | -4.18870 |
| C | 7.05420  | -6.39830 | -2.39190 |
| C | 8.36000  | -8.52300 | -2.05820 |
| H | 9.31430  | -6.57340 | 2.91780  |
| H | 10.68640 | -6.17850 | 2.11610  |
| H | 7.98270  | -5.11020 | 1.81160  |
| H | 9.65190  | -6.87860 | 0.02720  |
| H | 13.06440 | -6.10630 | -4.66980 |
| H | 13.50580 | -6.50940 | -2.97630 |
| H | 12.76160 | -7.75080 | -4.01440 |
| H | 9.82230  | -3.05770 | 4.36940  |
| H | 8.60780  | -4.32960 | 4.19880  |
| H | 10.33630 | -4.72620 | 4.12070  |
| H | 8.91770  | -1.65970 | 2.62490  |
| H | 8.52890  | -2.28880 | 1.00510  |
| H | 7.57560  | -2.79190 | 2.41000  |
| H | 10.97630 | -3.06090 | 0.78110  |
| H | 11.34520 | -2.47460 | 2.41060  |
| H | 11.69200 | -4.15000 | 1.98850  |
| H | 7.75580  | -7.71330 | -4.64870 |
| H | 8.69230  | -6.20970 | -4.64560 |
| H | 9.50950  | -7.76680 | -4.44720 |
| H | 6.23340  | -6.97280 | -2.83580 |
| H | 6.85930  | -6.30850 | -1.31950 |
| H | 7.03800  | -5.39120 | -2.82090 |
| H | 7.55310  | -9.10220 | -2.52070 |
| H | 9.29780  | -9.06400 | -2.21760 |
| H | 8.16580  | -8.49470 | -0.98080 |
| H | 9.47100  | -5.22760 | -2.44050 |

|    |        |          |          |          |
|----|--------|----------|----------|----------|
| 6. | N1000t | GP       |          |          |
|    | N      | 9.13650  | -6.31130 | 2.11400  |
|    | C      | 9.14080  | -4.95790 | 1.55960  |
|    | C      | 9.11010  | -4.92960 | 0.02730  |
|    | N      | 9.41280  | -6.10160 | -0.58060 |
|    | C      | 9.46560  | -6.21680 | -2.01780 |
|    | C      | 9.80340  | -7.63990 | -2.41160 |
|    | O      | 9.84850  | -7.76810 | -3.74920 |
|    | C      | 10.16860 | -9.08260 | -4.25160 |
|    | O      | 10.00990 | -8.54860 | -1.63200 |
|    | O      | 8.85090  | -3.89430 | -0.58730 |
|    | C      | 9.70650  | -6.51880 | 3.47130  |
|    | C      | 9.39600  | -7.97740 | 3.84660  |
|    | C      | 9.08910  | -5.57150 | 4.52390  |
|    | C      | 11.23250 | -6.32730 | 3.41560  |
|    | H      | 8.18430  | -6.67090 | 2.10700  |
|    | H      | 10.06550 | -4.44770 | 1.84710  |
|    | H      | 8.31470  | -4.31730 | 1.89920  |
|    | H      | 9.62280  | -6.90800 | 0.00050  |
|    | H      | 10.21510 | -5.54010 | -2.44820 |
|    | H      | 8.50940  | -5.93380 | -2.47540 |
|    | H      | 11.15580 | -9.39180 | -3.90070 |
|    | H      | 9.42220  | -9.80740 | -3.91900 |
|    | H      | 10.15700 | -8.98590 | -5.33650 |
|    | H      | 8.31350  | -8.15070 | 3.89400  |
|    | H      | 9.81970  | -8.66390 | 3.10710  |
|    | H      | 9.81290  | -8.22210 | 4.82870  |
|    | H      | 9.49550  | -5.77580 | 5.52070  |
|    | H      | 9.29610  | -4.52140 | 4.29240  |
|    | H      | 8.00100  | -5.69880 | 4.57300  |
|    | H      | 11.67800 | -6.55900 | 4.38870  |
|    | H      | 11.67300 | -6.99040 | 2.66480  |
|    | H      | 11.51240 | -5.29780 | 3.16970  |

7. N1010t\_GP

|   |          |          |          |
|---|----------|----------|----------|
| N | 9.11200  | -6.30530 | 2.11330  |
| C | 9.15790  | -4.95420 | 1.55440  |
| C | 9.10970  | -4.92800 | 0.02070  |
| N | 9.41480  | -6.10950 | -0.57810 |
| C | 9.35670  | -6.31010 | -2.01560 |
| C | 8.41910  | -7.48750 | -2.28200 |
| O | 7.66160  | -7.29170 | -3.37790 |
| C | 6.76220  | -8.36400 | -3.72800 |
| O | 8.35570  | -8.48810 | -1.59310 |
| O | 8.84930  | -3.88810 | -0.58310 |
| C | 10.77820 | -6.50340 | -2.66880 |
| C | 11.58880 | -5.21460 | -2.42570 |
| C | 11.52200 | -7.70130 | -2.04720 |
| C | 10.62890 | -6.71850 | -4.18810 |
| C | 9.67590  | -6.52490 | 3.47130  |
| C | 9.31700  | -7.97000 | 3.85520  |
| C | 11.20740 | -6.38360 | 3.41350  |
| C | 9.09150  | -5.55130 | 4.51870  |
| H | 8.14910  | -6.63540 | 2.10800  |
| H | 10.10310 | -4.47650 | 1.83120  |
| H | 8.35760  | -4.28500 | 1.89950  |
| H | 9.52620  | -6.90690 | 0.04120  |
| H | 8.91190  | -5.40870 | -2.44400 |
| H | 7.32200  | -9.28100 | -3.92720 |
| H | 6.05380  | -8.54370 | -2.91620 |
| H | 6.24470  | -8.02460 | -4.62470 |
| H | 12.58310 | -5.31050 | -2.87620 |
| H | 11.09610 | -4.34200 | -2.86640 |
| H | 11.72090 | -5.01960 | -1.35770 |
| H | 12.50770 | -7.80730 | -2.51390 |
| H | 11.68130 | -7.56060 | -0.97300 |
| H | 10.98010 | -8.64160 | -2.18760 |
| H | 10.13070 | -7.66370 | -4.42630 |
| H | 10.05460 | -5.91060 | -4.65430 |
| H | 11.61900 | -6.74110 | -4.65640 |
| H | 9.72790  | -8.22340 | 4.83760  |
| H | 8.22960  | -8.10650 | 3.90550  |
| H | 9.71510  | -8.67470 | 3.11860  |
| H | 11.64590 | -6.61870 | 4.38890  |
| H | 11.62640 | -7.06920 | 2.67050  |
| H | 11.52030 | -5.36650 | 3.15560  |
| H | 7.99980  | -5.64190 | 4.56910  |
| H | 9.49170  | -5.76420 | 5.51610  |
| H | 9.33330  | -4.50990 | 4.28180  |

|    |           |          |          |
|----|-----------|----------|----------|
| 8. | N1100t_GP |          |          |
|    | N         | 9.69340  | -3.70790 |
|    | C         | 9.11630  | -4.94530 |
|    | C         | 9.10940  | -4.92750 |
|    | N         | 9.41130  | -6.09540 |
|    | C         | 9.38320  | -6.21070 |
|    | C         | 9.64140  | -7.65070 |
|    | O         | 9.62400  | -7.79610 |
|    | C         | 9.85120  | -9.13170 |
|    | O         | 9.83830  | -8.55760 |
|    | O         | 8.85310  | -3.90260 |
|    | C         | 7.67270  | -5.19050 |
|    | C         | 6.74540  | -3.99230 |
|    | C         | 7.80980  | -5.37860 |
|    | C         | 7.05200  | -6.46820 |
|    | C         | 11.16050 | -3.61600 |
|    | C         | 11.99580 | -3.95620 |
|    | C         | 11.43160 | -2.15550 |
|    | C         | 11.56980 | -4.53810 |
|    | H         | 9.40200  | -2.95080 |
|    | H         | 9.73060  | -5.79040 |
|    | H         | 9.58680  | -6.94650 |
|    | H         | 10.13810 | -5.56730 |
|    | H         | 8.41630  | -5.89070 |
|    | H         | 10.83330 | -9.49130 |
|    | H         | 9.07960  | -9.81000 |
|    | H         | 9.79980  | -9.04320 |
|    | H         | 5.75070  | -4.18690 |
|    | H         | 7.13000  | -3.08120 |
|    | H         | 6.63520  | -3.80510 |
|    | H         | 6.82190  | -5.51520 |
|    | H         | 8.41190  | -6.26370 |
|    | H         | 8.28480  | -4.50650 |
|    | H         | 7.70010  | -7.34220 |
|    | H         | 6.09890  | -6.68610 |
|    | H         | 6.84990  | -6.36910 |
|    | H         | 13.06480 | -3.81220 |
|    | H         | 11.85800 | -4.99840 |
|    | H         | 11.71320 | -3.31470 |
|    | H         | 12.49420 | -2.00300 |
|    | H         | 11.15280 | -1.46780 |
|    | H         | 10.85230 | -1.89010 |
|    | H         | 10.99710 | -4.29550 |
|    | H         | 11.40500 | -5.59570 |
|    | H         | 12.63550 | -4.41820 |



9. N1110t\_GP

|   |          |          |          |
|---|----------|----------|----------|
| N | 8.84020  | -6.31800 | 2.06750  |
| C | 9.13000  | -4.96310 | 1.57630  |
| C | 9.10940  | -4.92700 | 0.02700  |
| N | 9.41440  | -6.10770 | -0.58110 |
| C | 9.28960  | -6.30420 | -2.01660 |
| C | 8.23930  | -7.38880 | -2.25620 |
| O | 7.45430  | -7.10670 | -3.31290 |
| C | 6.44840  | -8.08820 | -3.63900 |
| O | 8.11460  | -8.39180 | -1.57830 |
| O | 8.85010  | -3.89090 | -0.58630 |
| C | 10.47070 | -4.38420 | 2.17440  |
| C | 10.76420 | -2.99020 | 1.58150  |
| C | 11.67270 | -5.31080 | 1.89420  |
| C | 10.30450 | -4.21430 | 3.70170  |
| C | 10.66260 | -6.63130 | -2.71720 |
| C | 11.57330 | -5.39690 | -2.56830 |
| C | 11.34080 | -7.85570 | -2.07270 |
| C | 10.43330 | -6.89900 | -4.21850 |
| C | 7.44810  | -6.66010 | 2.47380  |
| C | 6.49060  | -6.46730 | 1.28540  |
| C | 7.47460  | -8.14690 | 2.86830  |
| C | 6.95940  | -5.82230 | 3.67730  |
| H | 9.46000  | -6.55920 | 2.83320  |
| H | 8.34590  | -4.25040 | 1.86420  |
| H | 9.41260  | -6.91630 | 0.03500  |
| H | 8.91470  | -5.36600 | -2.43320 |
| H | 5.92550  | -7.68710 | -4.50640 |
| H | 6.91500  | -9.04720 | -3.87690 |
| H | 5.76200  | -8.22010 | -2.79970 |
| H | 11.64870 | -2.56640 | 2.07060  |
| H | 10.95140 | -3.02740 | 0.50660  |
| H | 9.92600  | -2.30430 | 1.74000  |
| H | 12.58170 | -4.87980 | 2.32850  |
| H | 11.54660 | -6.30900 | 2.32760  |
| H | 11.84230 | -5.43500 | 0.82100  |
| H | 10.14470 | -5.16340 | 4.22440  |
| H | 11.20840 | -3.76280 | 4.12490  |
| H | 9.46100  | -3.55630 | 3.93760  |
| H | 12.54650 | -5.59130 | -3.03270 |
| H | 11.13520 | -4.51660 | -3.05060 |
| H | 11.74610 | -5.15100 | -1.51710 |
| H | 12.28840 | -8.06560 | -2.58130 |
| H | 11.56650 | -7.67810 | -1.01630 |
| H | 10.71670 | -8.75230 | -2.13880 |
| H | 9.86720  | -7.81980 | -4.39320 |
| H | 9.89160  | -6.07590 | -4.69680 |
| H | 11.39850 | -7.00670 | -4.72520 |
| H | 5.47450  | -6.74940 | 1.58020  |

|   |         |          |         |
|---|---------|----------|---------|
| H | 6.45620 | -5.42530 | 0.95050 |
| H | 6.78800 | -7.09550 | 0.44160 |
| H | 6.48100 | -8.48180 | 3.18430 |
| H | 7.79800 | -8.76290 | 2.02410 |
| H | 8.16360 | -8.32100 | 3.70450 |
| H | 6.93490 | -4.75240 | 3.44690 |
| H | 5.94450 | -6.11750 | 3.96590 |
| H | 7.61020 | -5.96750 | 4.54700 |

10. N111'0t\_GP

|   |          |          |          |
|---|----------|----------|----------|
| N | 9.64300  | -3.67420 | 2.09290  |
| C | 9.11470  | -4.94130 | 1.58480  |
| C | 9.10900  | -4.92560 | 0.03610  |
| N | 9.41320  | -6.10290 | -0.58550 |
| C | 9.66460  | -6.20830 | -2.01920 |
| C | 11.01110 | -6.91520 | -2.17120 |
| O | 11.71030 | -6.46510 | -3.22560 |
| C | 12.98600 | -7.09950 | -3.46140 |
| O | 11.41090 | -7.78670 | -1.42070 |
| O | 8.85160  | -3.89700 | -0.59100 |
| C | 7.69190  | -5.24410 | 2.19750  |
| C | 7.14750  | -6.58640 | 1.66950  |
| C | 6.69380  | -4.11820 | 1.86590  |
| C | 7.84550  | -5.35050 | 3.72770  |
| C | 8.50550  | -6.92490 | -2.81230 |
| C | 8.88040  | -7.03570 | -4.30400 |
| C | 8.22780  | -8.32980 | -2.24410 |
| C | 7.23690  | -6.05800 | -2.68780 |
| C | 11.10510 | -3.52950 | 2.31120  |
| C | 11.53370 | -4.39560 | 3.50990  |
| C | 11.96110 | -3.88980 | 1.07380  |
| C | 11.32810 | -2.04750 | 2.66130  |
| H | 9.33290  | -2.94220 | 1.45620  |
| H | 9.76870  | -5.75550 | 1.91820  |
| H | 9.73840  | -6.87970 | -0.02450 |
| H | 13.64080 | -6.96260 | -2.59810 |
| H | 12.85050 | -8.16760 | -3.64660 |
| H | 13.39490 | -6.60320 | -4.34050 |
| H | 6.21170  | -6.83600 | 2.18150  |
| H | 6.93700  | -6.55840 | 0.59680  |
| H | 7.84970  | -7.40930 | 1.85650  |
| H | 5.71720  | -4.34390 | 2.30950  |
| H | 7.03220  | -3.16180 | 2.27600  |
| H | 6.55750  | -3.99600 | 0.78720  |
| H | 8.25840  | -4.42760 | 4.14070  |
| H | 6.87030  | -5.53660 | 4.19230  |
| H | 8.50950  | -6.17860 | 4.00570  |
| H | 8.02460  | -7.42120 | -4.86850 |
| H | 9.14910  | -6.06110 | -4.72560 |
| H | 9.72040  | -7.71660 | -4.47310 |
| H | 7.41450  | -8.80200 | -2.80600 |
| H | 9.10390  | -8.98290 | -2.31110 |
| H | 7.91890  | -8.28420 | -1.19500 |
| H | 6.92710  | -5.94060 | -1.64650 |
| H | 7.39320  | -5.05680 | -3.10160 |
| H | 6.41180  | -6.53000 | -3.23290 |
| H | 12.59490 | -4.23910 | 3.73200  |
| H | 10.95030 | -4.13530 | 4.39810  |

|   |          |          |          |
|---|----------|----------|----------|
| H | 11.39810 | -5.46510 | 3.31600  |
| H | 13.02300 | -3.70240 | 1.27070  |
| H | 11.86290 | -4.94810 | 0.80810  |
| H | 11.66390 | -3.29140 | 0.20620  |
| H | 10.73160 | -1.76650 | 3.53480  |
| H | 12.38310 | -1.85480 | 2.88190  |
| H | 11.03730 | -1.39960 | 1.82560  |
| H | 9.75550  | -5.19070 | -2.40710 |

11. N0000t\_WP

|   |          |          |          |
|---|----------|----------|----------|
| N | 9.71170  | -6.13760 | 2.17170  |
| C | 9.07820  | -4.95880 | 1.56200  |
| C | 9.11280  | -4.94070 | 0.03210  |
| N | 9.41120  | -6.09530 | -0.57960 |
| C | 9.46600  | -6.24230 | -2.02260 |
| C | 9.86520  | -7.66100 | -2.38560 |
| O | 9.97620  | -7.80560 | -3.70720 |
| C | 10.33930 | -9.12110 | -4.21900 |
| O | 10.05450 | -8.55580 | -1.57490 |
| O | 8.84980  | -3.88960 | -0.59300 |
| H | 9.38230  | -6.24610 | 3.13250  |
| H | 10.72280 | -6.00450 | 2.23770  |
| H | 9.50340  | -4.00090 | 1.89010  |
| H | 8.01670  | -4.94140 | 1.84030  |
| H | 9.59190  | -6.90600 | 0.00510  |
| H | 10.19100 | -5.54680 | -2.46640 |
| H | 8.49150  | -6.02990 | -2.48520 |
| H | 10.40790 | -8.99380 | -5.29940 |
| H | 11.30060 | -9.43020 | -3.80350 |
| H | 9.56300  | -9.84550 | -3.96330 |

## 12. N0010t\_WP

|   |          |          |          |
|---|----------|----------|----------|
| N | 9.06100  | -6.27150 | 2.17060  |
| C | 9.14630  | -4.93750 | 1.55770  |
| C | 9.11200  | -4.93720 | 0.02650  |
| N | 9.41340  | -6.10390 | -0.57810 |
| C | 9.41010  | -6.30790 | -2.02390 |
| C | 8.47550  | -7.48370 | -2.32980 |
| O | 7.78030  | -7.29640 | -3.45590 |
| C | 6.89580  | -8.36880 | -3.89060 |
| O | 8.38140  | -8.48380 | -1.63200 |
| O | 8.84840  | -3.88440 | -0.58890 |
| C | 10.85750 | -6.50410 | -2.63030 |
| C | 10.76250 | -6.62160 | -4.16640 |
| C | 11.69550 | -5.25510 | -2.28520 |
| C | 11.55260 | -7.75700 | -2.06100 |
| H | 8.08660  | -6.57650 | 2.21800  |
| H | 9.38600  | -6.22410 | 3.13800  |
| H | 10.10180 | -4.47610 | 1.83920  |
| H | 8.35750  | -4.24530 | 1.87890  |
| H | 9.57160  | -6.89650 | 0.03790  |
| H | 8.98320  | -5.40910 | -2.47560 |
| H | 7.47340  | -9.27740 | -4.07530 |
| H | 6.13350  | -8.55410 | -3.13070 |
| H | 6.44250  | -8.00520 | -4.81290 |
| H | 10.23550 | -5.76360 | -4.60020 |
| H | 11.77270 | -6.64580 | -4.59140 |
| H | 10.24910 | -7.53470 | -4.48540 |
| H | 11.24060 | -4.34310 | -2.68830 |
| H | 11.81400 | -5.13360 | -1.20390 |
| H | 12.69590 | -5.35560 | -2.72200 |
| H | 11.65140 | -7.71020 | -0.97020 |
| H | 11.01760 | -8.67700 | -2.31850 |
| H | 12.56340 | -7.83310 | -2.47830 |

13. N0100t\_WP

|   |          |          |          |
|---|----------|----------|----------|
| N | 8.53240  | -6.17790 | 2.10520  |
| C | 9.12850  | -4.92680 | 1.58160  |
| C | 9.11140  | -4.93550 | 0.04340  |
| N | 9.41050  | -6.09230 | -0.58610 |
| C | 9.45980  | -6.16970 | -2.03490 |
| C | 10.60170 | -5.33820 | -2.62900 |
| O | 10.25740 | -4.82420 | -3.81780 |
| C | 11.25380 | -4.03160 | -4.52330 |
| O | 11.69630 | -5.18480 | -2.11310 |
| O | 8.85190  | -3.89770 | -0.59790 |
| C | 10.56780 | -4.64890 | 2.16800  |
| C | 10.46140 | -4.54810 | 3.70650  |
| C | 11.08370 | -3.29310 | 1.63670  |
| C | 11.58530 | -5.75020 | 1.80800  |
| H | 8.47430  | -6.12360 | 3.12410  |
| H | 7.55900  | -6.23370 | 1.79430  |
| H | 8.52270  | -4.04870 | 1.84850  |
| H | 9.56980  | -6.93140 | -0.03830 |
| H | 8.51510  | -5.84050 | -2.47940 |
| H | 9.62960  | -7.21460 | -2.32120 |
| H | 11.54450 | -3.17270 | -3.91410 |
| H | 12.12780 | -4.64450 | -4.75430 |
| H | 10.76020 | -3.70320 | -5.43830 |
| H | 10.20690 | -5.50700 | 4.17160  |
| H | 11.42820 | -4.23740 | 4.11990  |
| H | 9.71330  | -3.80540 | 4.00950  |
| H | 10.38850 | -2.48010 | 1.87720  |
| H | 12.04890 | -3.05990 | 2.10190  |
| H | 11.23050 | -3.30260 | 0.55260  |
| H | 11.76470 | -5.79790 | 0.72990  |
| H | 12.54340 | -5.53500 | 2.29620  |
| H | 11.25230 | -6.73680 | 2.14640  |

14. N0110t\_WP

|   |          |          |          |
|---|----------|----------|----------|
| N | 8.24670  | -6.08810 | 2.03180  |
| C | 9.09150  | -4.95740 | 1.57620  |
| C | 9.11130  | -4.93450 | 0.03170  |
| N | 9.41300  | -6.10240 | -0.58120 |
| C | 9.30910  | -6.34160 | -2.02130 |
| C | 8.63610  | -7.71020 | -2.17780 |
| O | 7.94790  | -7.82330 | -3.31390 |
| C | 7.32820  | -9.11230 | -3.59400 |
| O | 8.73670  | -8.60880 | -1.35270 |
| O | 8.84950  | -3.88860 | -0.59110 |
| C | 10.51530 | -4.96290 | 2.25060  |
| C | 11.33820 | -6.23300 | 1.95070  |
| C | 11.30270 | -3.72520 | 1.77070  |
| C | 10.32590 | -4.85100 | 3.78080  |
| C | 10.69160 | -6.26320 | -2.79680 |
| C | 10.43050 | -6.26330 | -4.31820 |
| C | 11.39420 | -4.93870 | -2.43420 |
| C | 11.61850 | -7.44070 | -2.43240 |
| H | 7.31760  | -5.99800 | 1.61180  |
| H | 8.08410  | -5.99950 | 3.03690  |
| H | 8.64250  | -3.98910 | 1.83930  |
| H | 9.48020  | -6.92600 | 0.00780  |
| H | 8.65180  | -5.57530 | -2.44370 |
| H | 6.82070  | -8.98100 | -4.54960 |
| H | 8.09650  | -9.88560 | -3.66690 |
| H | 6.61470  | -9.36170 | -2.80560 |
| H | 12.25570 | -6.22300 | 2.55080  |
| H | 10.78600 | -7.14460 | 2.20210  |
| H | 11.63880 | -6.28850 | 0.90010  |
| H | 12.27460 | -3.68210 | 2.27630  |
| H | 11.49350 | -3.75080 | 0.69250  |
| H | 10.76390 | -2.79740 | 1.99600  |
| H | 11.30120 | -4.71610 | 4.26300  |
| H | 9.69840  | -3.99150 | 4.04610  |
| H | 9.87700  | -5.75400 | 4.20990  |
| H | 11.38060 | -6.11940 | -4.84590 |
| H | 9.99290  | -7.20200 | -4.66960 |
| H | 9.75960  | -5.44430 | -4.60510 |
| H | 12.31820 | -4.85260 | -3.01720 |
| H | 10.76550 | -4.07200 | -2.66160 |
| H | 11.66650 | -4.89990 | -1.37600 |
| H | 11.79730 | -7.50180 | -1.35300 |
| H | 11.21580 | -8.40360 | -2.76660 |
| H | 12.58980 | -7.30230 | -2.92170 |



15. N011'0t\_WP

|   |          |          |          |
|---|----------|----------|----------|
| N | 9.64610  | -6.29180 | 2.04350  |
| C | 9.04730  | -5.02060 | 1.58500  |
| C | 9.11130  | -4.93470 | 0.03420  |
| N | 9.41230  | -6.09950 | -0.58220 |
| C | 9.49620  | -6.26880 | -2.02580 |
| C | 10.85340 | -6.90180 | -2.35090 |
| O | 11.37410 | -6.42150 | -3.48470 |
| C | 12.63760 | -6.98470 | -3.94030 |
| O | 11.39880 | -7.75220 | -1.66090 |
| O | 8.85020  | -3.89130 | -0.59250 |
| C | 9.57330  | -3.72790 | 2.31980  |
| C | 9.61550  | -4.00740 | 3.83940  |
| C | 8.60550  | -2.54440 | 2.10020  |
| C | 10.98820 | -3.34960 | 1.83650  |
| C | 8.27920  | -7.08790 | -2.61620 |
| C | 8.42140  | -7.20670 | -4.14730 |
| C | 6.98400  | -6.31040 | -2.30050 |
| C | 8.19170  | -8.49520 | -1.99400 |
| H | 9.27200  | -6.54950 | 2.95600  |
| H | 10.65830 | -6.21080 | 2.15890  |
| H | 7.97120  | -5.09210 | 1.80530  |
| H | 9.62460  | -6.87900 | 0.03450  |
| H | 12.85400 | -6.47350 | -4.87870 |
| H | 13.41970 | -6.78820 | -3.20350 |
| H | 12.53070 | -8.05990 | -4.10120 |
| H | 9.86330  | -3.08320 | 4.37410  |
| H | 8.64180  | -4.35590 | 4.20680  |
| H | 10.36850 | -4.75550 | 4.10620  |
| H | 8.94020  | -1.67720 | 2.68300  |
| H | 8.54790  | -2.25810 | 1.04980  |
| H | 7.59470  | -2.80460 | 2.43950  |
| H | 10.98900 | -3.06390 | 0.77980  |
| H | 11.36990 | -2.49910 | 2.41360  |
| H | 11.69730 | -4.17700 | 1.96810  |
| H | 7.51930  | -7.67390 | -4.55900 |
| H | 8.53530  | -6.22220 | -4.61620 |
| H | 9.27640  | -7.82610 | -4.43890 |
| H | 6.12380  | -6.85140 | -2.71120 |
| H | 6.82820  | -6.20450 | -1.22240 |
| H | 6.99930  | -5.30970 | -2.74660 |
| H | 7.32120  | -9.02090 | -2.40280 |
| H | 9.07930  | -9.09690 | -2.21540 |
| H | 8.06700  | -8.45080 | -0.90610 |
| H | 9.47230  | -5.27310 | -2.47470 |

16. N1000t\_WP

|   |          |          |          |
|---|----------|----------|----------|
| N | 9.66690  | -6.20140 | 2.13480  |
| C | 9.08270  | -4.98670 | 1.55980  |
| C | 9.11320  | -4.94200 | 0.02530  |
| N | 9.41210  | -6.09890 | -0.57630 |
| C | 9.48820  | -6.29380 | -2.00990 |
| C | 9.96550  | -7.70690 | -2.30380 |
| O | 10.10430 | -7.91040 | -3.61490 |
| C | 10.55720 | -9.22770 | -4.04490 |
| O | 10.19170 | -8.54960 | -1.44870 |
| O | 8.84850  | -3.88460 | -0.58960 |
| C | 11.04930 | -6.11820 | 2.70090  |
| C | 11.44490 | -7.55060 | 3.10050  |
| C | 11.10570 | -5.20790 | 3.94810  |
| C | 12.03470 | -5.59940 | 1.63800  |
| H | 9.04620  | -6.56900 | 2.85580  |
| H | 9.55120  | -4.05640 | 1.90790  |
| H | 8.02390  | -4.91790 | 1.84250  |
| H | 9.60120  | -6.88510 | 0.04370  |
| H | 10.18850 | -5.58400 | -2.47100 |
| H | 8.51140  | -6.14710 | -2.49210 |
| H | 11.55390 | -9.42500 | -3.64420 |
| H | 9.85410  | -9.99150 | -3.70630 |
| H | 10.58120 | -9.17760 | -5.13330 |
| H | 10.74410 | -7.95760 | 3.83990  |
| H | 11.44460 | -8.21030 | 2.22590  |
| H | 12.44720 | -7.56180 | 3.54390  |
| H | 12.12070 | -5.18780 | 4.36180  |
| H | 10.82610 | -4.17510 | 3.71190  |
| H | 10.42920 | -5.57880 | 4.72730  |
| H | 13.04740 | -5.59190 | 2.05570  |
| H | 12.03810 | -6.24070 | 0.75100  |
| H | 11.80560 | -4.57450 | 1.32480  |

17. N1010t\_WP

|   |          |          |          |
|---|----------|----------|----------|
| N | 9.22690  | -6.34800 | 2.08430  |
| C | 9.15060  | -4.98600 | 1.55440  |
| C | 9.11270  | -4.93990 | 0.01700  |
| N | 9.41430  | -6.10760 | -0.57320 |
| C | 9.43360  | -6.37380 | -2.00350 |
| C | 8.56080  | -7.61140 | -2.24610 |
| O | 7.83630  | -7.51550 | -3.36550 |
| C | 7.00070  | -8.65600 | -3.71760 |
| O | 8.53120  | -8.58100 | -1.50240 |
| O | 8.84680  | -3.87800 | -0.58430 |
| C | 10.89720 | -6.53840 | -2.57880 |
| C | 11.65690 | -5.21710 | -2.33740 |
| C | 11.65430 | -7.69250 | -1.89200 |
| C | 10.82810 | -6.80040 | -4.09700 |
| C | 10.15670 | -6.63680 | 3.21180  |
| C | 9.92500  | -8.11010 | 3.59080  |
| C | 11.61310 | -6.46230 | 2.74290  |
| C | 9.88750  | -5.74180 | 4.44150  |
| H | 8.29230  | -6.67330 | 2.33020  |
| H | 10.03020 | -4.40060 | 1.84650  |
| H | 8.27620  | -4.42360 | 1.90840  |
| H | 9.53500  | -6.87220 | 0.09350  |
| H | 8.97010  | -5.52260 | -2.50940 |
| H | 7.62140  | -9.54440 | -3.85430 |
| H | 6.26110  | -8.83010 | -2.93280 |
| H | 6.51580  | -8.37420 | -4.65210 |
| H | 12.67100 | -5.29880 | -2.74540 |
| H | 11.16080 | -4.37300 | -2.83000 |
| H | 11.74520 | -4.98940 | -1.27030 |
| H | 12.67010 | -7.75300 | -2.29910 |
| H | 11.74450 | -7.53450 | -0.81170 |
| H | 11.17000 | -8.66010 | -2.05850 |
| H | 10.37090 | -7.76800 | -4.33060 |
| H | 10.25780 | -6.01830 | -4.61190 |
| H | 11.84290 | -6.80650 | -4.51120 |
| H | 10.58800 | -8.40310 | 4.41250  |
| H | 8.89020  | -8.27170 | 3.91750  |
| H | 10.12180 | -8.76500 | 2.73480  |
| H | 12.29970 | -6.72690 | 3.55490  |
| H | 11.82450 | -7.11480 | 1.88860  |
| H | 11.83670 | -5.42950 | 2.45220  |
| H | 8.85310  | -5.85980 | 4.78570  |
| H | 10.55490 | -6.01200 | 5.26830  |
| H | 10.05460 | -4.68290 | 4.21360  |

## 18. N1100t\_WP

|   |          |          |          |
|---|----------|----------|----------|
| N | 9.79610  | -3.85600 | 2.19380  |
| C | 9.09780  | -4.98780 | 1.58300  |
| C | 9.11120  | -4.93450 | 0.03930  |
| N | 9.41160  | -6.09670 | -0.58450 |
| C | 9.36040  | -6.26170 | -2.02670 |
| C | 9.35450  | -7.73960 | -2.37750 |
| O | 9.11850  | -7.92690 | -3.67710 |
| C | 9.09290  | -9.29900 | -4.16830 |
| O | 9.55120  | -8.64070 | -1.57560 |
| O | 8.85100  | -3.89430 | -0.59530 |
| C | 7.62620  | -5.11810 | 2.15130  |
| C | 6.85130  | -3.79150 | 2.03180  |
| C | 7.73490  | -5.50500 | 3.64070  |
| C | 6.85260  | -6.22890 | 1.41200  |
| C | 11.25850 | -3.93910 | 2.44710  |
| C | 12.09330 | -4.16270 | 1.16520  |
| C | 11.65180 | -2.59010 | 3.07700  |
| C | 11.55520 | -5.06180 | 3.45970  |
| H | 9.59330  | -3.00720 | 1.66710  |
| H | 9.60860  | -5.90990 | 1.87990  |
| H | 9.65620  | -6.91590 | -0.03630 |
| H | 10.22350 | -5.79610 | -2.52710 |
| H | 8.46010  | -5.78960 | -2.43740 |
| H | 10.06650 | -9.76860 | -4.01180 |
| H | 8.31140  | -9.86220 | -3.65350 |
| H | 8.87070  | -9.21380 | -5.23210 |
| H | 5.84580  | -3.91330 | 2.45230  |
| H | 7.35070  | -2.99180 | 2.58780  |
| H | 6.74610  | -3.47590 | 0.98900  |
| H | 6.73570  | -5.56500 | 4.08860  |
| H | 8.21610  | -6.48380 | 3.76250  |
| H | 8.31800  | -4.76380 | 4.19420  |
| H | 7.39400  | -7.18250 | 1.43790  |
| H | 5.87970  | -6.38540 | 1.89310  |
| H | 6.66390  | -5.97350 | 0.36320  |
| H | 13.16500 | -4.16690 | 1.39650  |
| H | 11.85320 | -5.12100 | 0.69220  |
| H | 11.90540 | -3.36530 | 0.43700  |
| H | 12.72530 | -2.56560 | 3.29470  |
| H | 11.42610 | -1.75960 | 2.39620  |
| H | 11.10180 | -2.42760 | 4.01010  |
| H | 10.96660 | -4.92380 | 4.37270  |
| H | 11.33850 | -6.05750 | 3.05670  |
| H | 12.61750 | -5.04650 | 3.72800  |

19. N1110t\_WP

|   |          |          |          |
|---|----------|----------|----------|
| N | 8.69120  | -6.29570 | 2.06200  |
| C | 9.12040  | -4.97410 | 1.57860  |
| C | 9.11150  | -4.93540 | 0.02760  |
| N | 9.41370  | -6.10490 | -0.57910 |
| C | 9.34970  | -6.33590 | -2.01840 |
| C | 8.40600  | -7.51840 | -2.26770 |
| O | 7.64190  | -7.33510 | -3.35030 |
| C | 6.75150  | -8.42070 | -3.73740 |
| O | 8.35950  | -8.51820 | -1.56560 |
| O | 8.84860  | -3.88510 | -0.58900 |
| C | 10.50720 | -4.54170 | 2.20200  |
| C | 10.99190 | -3.21850 | 1.57320  |
| C | 11.59690 | -5.61720 | 2.00330  |
| C | 10.30840 | -4.29640 | 3.71640  |
| C | 10.77110 | -6.55440 | -2.67250 |
| C | 11.58250 | -5.25530 | -2.48950 |
| C | 11.52450 | -7.72750 | -2.01460 |
| C | 10.61490 | -6.82720 | -4.18280 |
| C | 7.24450  | -6.49530 | 2.38330  |
| C | 6.37740  | -6.20270 | 1.14650  |
| C | 7.09440  | -7.97620 | 2.77130  |
| C | 6.77780  | -5.61240 | 3.56350  |
| H | 9.22780  | -6.56420 | 2.88360  |
| H | 8.41130  | -4.18360 | 1.86090  |
| H | 9.44930  | -6.90960 | 0.04410  |
| H | 8.90930  | -5.44560 | -2.47450 |
| H | 6.25090  | -8.06900 | -4.63980 |
| H | 7.33180  | -9.32310 | -3.94340 |
| H | 6.02750  | -8.61120 | -2.94200 |
| H | 11.89970 | -2.88420 | 2.08860  |
| H | 11.23280 | -3.32620 | 0.51160  |
| H | 10.23780 | -2.42940 | 1.66970  |
| H | 12.53610 | -5.27040 | 2.44920  |
| H | 11.34130 | -6.56830 | 2.48300  |
| H | 11.78400 | -5.81370 | 0.94310  |
| H | 9.99980  | -5.19870 | 4.25560  |
| H | 11.25280 | -3.96170 | 4.16050  |
| H | 9.55730  | -3.51840 | 3.89690  |
| H | 12.57530 | -5.37670 | -2.93750 |
| H | 11.09170 | -4.40540 | -2.97770 |
| H | 11.72190 | -5.01010 | -1.43260 |
| H | 12.51840 | -7.82070 | -2.46750 |
| H | 11.66490 | -7.57030 | -0.93970 |
| H | 11.00210 | -8.67920 | -2.15600 |
| H | 10.12160 | -7.78450 | -4.38400 |
| H | 10.04200 | -6.03470 | -4.67860 |
| H | 11.60700 | -6.86480 | -4.64710 |
| H | 5.32760  | -6.41550 | 1.37510  |

|   |         |          |         |
|---|---------|----------|---------|
| H | 6.43770 | -5.15270 | 0.83980 |
| H | 6.67520 | -6.83040 | 0.30140 |
| H | 6.05560 | -8.19940 | 3.03880 |
| H | 7.38620 | -8.62490 | 1.93850 |
| H | 7.72500 | -8.22010 | 3.63570 |
| H | 6.87750 | -4.54430 | 3.34090 |
| H | 5.72200 | -5.80340 | 3.78740 |
| H | 7.35960 | -5.83010 | 4.46680 |

## 20. N111'0t\_WP

|   |          |          |          |
|---|----------|----------|----------|
| N | 9.53120  | -3.66510 | 2.12850  |
| C | 9.12190  | -4.96190 | 1.58780  |
| C | 9.11060  | -4.93180 | 0.03540  |
| N | 9.41300  | -6.10230 | -0.58360 |
| C | 9.59130  | -6.25190 | -2.02890 |
| C | 10.83460 | -7.12620 | -2.22660 |
| O | 11.51180 | -6.81680 | -3.33330 |
| C | 12.67970 | -7.62750 | -3.65700 |
| O | 11.16430 | -8.01910 | -1.45660 |
| O | 8.85030  | -3.89140 | -0.59240 |
| C | 7.74440  | -5.42570 | 2.21680  |
| C | 7.33420  | -6.81890 | 1.69840  |
| C | 6.62290  | -4.41320 | 1.91540  |
| C | 7.93570  | -5.53020 | 3.74410  |
| C | 8.32170  | -6.82880 | -2.78010 |
| C | 8.57450  | -6.83880 | -4.30280 |
| C | 7.98100  | -8.25420 | -2.30260 |
| C | 7.12310  | -5.89730 | -2.50350 |
| C | 10.97350 | -3.40390 | 2.37910  |
| C | 11.47820 | -4.30670 | 3.52080  |
| C | 11.86370 | -3.60420 | 1.13010  |
| C | 11.05940 | -1.93450 | 2.82930  |
| H | 9.16700  | -2.93250 | 1.52070  |
| H | 9.85420  | -5.71980 | 1.88970  |
| H | 9.70760  | -6.88660 | -0.00970 |
| H | 13.42160 | -7.54550 | -2.85980 |
| H | 12.38270 | -8.67010 | -3.79160 |
| H | 13.06420 | -7.21210 | -4.58850 |
| H | 6.44990  | -7.16750 | 2.24440  |
| H | 7.08080  | -6.81340 | 0.63500  |
| H | 8.13100  | -7.55740 | 1.85600  |
| H | 5.68980  | -4.74050 | 2.38960  |
| H | 6.86880  | -3.42220 | 2.31090  |
| H | 6.43590  | -4.31830 | 0.84020  |
| H | 8.24760  | -4.57290 | 4.16790  |
| H | 6.99360  | -5.83360 | 4.21620  |
| H | 8.69340  | -6.28270 | 3.99630  |
| H | 7.65040  | -7.12470 | -4.81860 |
| H | 8.86710  | -5.84610 | -4.66550 |
| H | 9.35140  | -7.55180 | -4.59520 |
| H | 7.05720  | -8.58990 | -2.78780 |
| H | 8.76910  | -8.97170 | -2.55560 |
| H | 7.81910  | -8.29370 | -1.22020 |
| H | 6.87260  | -5.85560 | -1.44050 |
| H | 7.32150  | -4.87660 | -2.84610 |
| H | 6.24360  | -6.27320 | -3.03880 |
| H | 12.51680 | -4.05490 | 3.76350  |
| H | 10.86850 | -4.16890 | 4.41970  |

|   |          |          |          |
|---|----------|----------|----------|
| H | 11.45700 | -5.36830 | 3.24960  |
| H | 12.90760 | -3.35780 | 1.35720  |
| H | 11.84000 | -4.64320 | 0.78210  |
| H | 11.53130 | -2.96070 | 0.30790  |
| H | 10.45760 | -1.77390 | 3.73030  |
| H | 12.09670 | -1.65800 | 3.04770  |
| H | 10.68920 | -1.26290 | 2.04450  |
| H | 9.79380  | -5.26040 | -2.44380 |



21. N0000c\_GP

|   |          |           |          |
|---|----------|-----------|----------|
| N | 8.77670  | -3.67320  | 2.20740  |
| C | 9.10150  | -4.94150  | 1.58020  |
| C | 9.10840  | -4.92330  | 0.04070  |
| N | 9.41220  | -6.09880  | -0.58820 |
| C | 9.72780  | -7.36360  | 0.03740  |
| C | 10.00410 | -8.40460  | -1.03560 |
| O | 10.30450 | -9.58920  | -0.48210 |
| C | 10.58810 | -10.66740 | -1.40260 |
| O | 9.95870  | -8.19350  | -2.22940 |
| O | 8.85330  | -3.90340  | -0.59300 |
| H | 7.86740  | -3.35530  | 1.87970  |
| H | 9.43440  | -2.96200  | 1.89620  |
| H | 8.38710  | -5.70190  | 1.92270  |
| H | 10.08620 | -5.27310  | 1.93570  |
| H | 9.41470  | -6.08420  | -1.60340 |
| H | 8.90770  | -7.74130  | 0.66310  |
| H | 10.61580 | -7.30590  | 0.68140  |
| H | 10.80620 | -11.52980 | -0.77470 |
| H | 9.72050  | -10.85810 | -2.03790 |
| H | 11.44730 | -10.41330 | -2.02690 |

22. N0010c\_GP

|   |          |           |          |
|---|----------|-----------|----------|
| N | 8.68150  | -3.64670  | 2.17850  |
| C | 9.08490  | -4.91160  | 1.58870  |
| C | 9.10800  | -4.92200  | 0.04710  |
| N | 9.41160  | -6.09660  | -0.59140 |
| C | 9.84710  | -7.36210  | -0.01430 |
| C | 11.27340 | -7.63600  | -0.50400 |
| O | 12.08770 | -8.00350  | 0.50420  |
| C | 13.45530 | -8.29470  | 0.13990  |
| O | 11.63430 | -7.52880  | -1.65870 |
| O | 8.85420  | -3.90690  | -0.59620 |
| C | 8.86650  | -8.55330  | -0.33200 |
| C | 7.52750  | -8.26750  | 0.37540  |
| C | 8.62210  | -8.69800  | -1.84700 |
| C | 9.46120  | -9.86290  | 0.22380  |
| H | 7.73940  | -3.41340  | 1.87350  |
| H | 9.27010  | -2.90080  | 1.81440  |
| H | 8.41350  | -5.69950  | 1.94890  |
| H | 10.08670 | -5.16860  | 1.95690  |
| H | 9.50720  | -6.00230  | -1.59690 |
| H | 9.89060  | -7.25830  | 1.07010  |
| H | 13.48990 | -9.13430  | -0.55820 |
| H | 13.91610 | -7.42010  | -0.32410 |
| H | 13.95440 | -8.54770  | 1.07430  |
| H | 6.80860  | -9.06370  | 0.15430  |
| H | 7.64920  | -8.22490  | 1.46440  |
| H | 7.09110  | -7.32230  | 0.03850  |
| H | 8.12870  | -7.81270  | -2.26150 |
| H | 9.55180  | -8.86140  | -2.39910 |
| H | 7.96240  | -9.55290  | -2.03140 |
| H | 8.73770  | -10.67690 | 0.10970  |
| H | 10.37200 | -10.15900 | -0.30750 |
| H | 9.70470  | -9.77750  | 1.28880  |

## 23. N0100c\_GP

|   |          |           |          |
|---|----------|-----------|----------|
| N | 9.90610  | -3.73430  | 2.06120  |
| C | 9.12390  | -4.88510  | 1.59270  |
| C | 9.10850  | -4.92400  | 0.05040  |
| N | 9.41080  | -6.09310  | -0.59230 |
| C | 9.80960  | -7.36480  | -0.02830 |
| C | 10.07260 | -8.35270  | -1.15430 |
| O | 10.43070 | -9.54870  | -0.66120 |
| C | 10.71200 | -10.57910 | -1.63530 |
| O | 9.97530  | -8.09710  | -2.33630 |
| O | 8.85460  | -3.90840  | -0.59860 |
| C | 7.67820  | -4.86820  | 2.21130  |
| C | 6.95440  | -3.53890  | 1.91730  |
| C | 7.81640  | -5.04420  | 3.73680  |
| C | 6.84320  | -6.03470  | 1.64580  |
| H | 10.89970 | -3.90160  | 1.92510  |
| H | 9.66850  | -2.92240  | 1.49380  |
| H | 9.61620  | -5.78520  | 1.97790  |
| H | 9.40430  | -6.04450  | -1.60710 |
| H | 9.04000  | -7.79920  | 0.62040  |
| H | 10.72930 | -7.29390  | 0.56790  |
| H | 10.98070 | -11.45850 | -1.05210 |
| H | 9.82700  | -10.77240 | -2.24520 |
| H | 11.53850 | -10.27260 | -2.28000 |
| H | 7.48420  | -2.69230  | 2.36500  |
| H | 6.86000  | -3.35590  | 0.84380  |
| H | 5.94930  | -3.56410  | 2.35380  |
| H | 6.83070  | -5.00460  | 4.21430  |
| H | 8.26890  | -6.01230  | 3.98690  |
| H | 8.44250  | -4.25630  | 4.16240  |
| H | 7.31030  | -7.00510  | 1.85570  |
| H | 5.85380  | -6.04810  | 2.11570  |
| H | 6.69120  | -5.94970  | 0.56460  |

## 24. N0110c\_GP

|   |          |           |          |
|---|----------|-----------|----------|
| N | 9.90870  | -3.71290  | 2.04740  |
| C | 9.11080  | -4.86210  | 1.59920  |
| C | 9.10770  | -4.92120  | 0.05700  |
| N | 9.41070  | -6.09270  | -0.59600 |
| C | 9.92220  | -7.34740  | -0.06170 |
| C | 11.44310 | -7.25460  | 0.13880  |
| O | 11.80590 | -7.69730  | 1.36230  |
| C | 13.22100 | -7.67770  | 1.64960  |
| O | 12.23030 | -6.83090  | -0.68180 |
| O | 8.85540  | -3.91150  | -0.60150 |
| C | 7.66500  | -4.81310  | 2.21370  |
| C | 6.95960  | -3.47840  | 1.90140  |
| C | 6.81770  | -5.97610  | 1.66230  |
| C | 7.80000  | -4.97020  | 3.74150  |
| C | 9.52390  | -8.57010  | -0.96900 |
| C | 10.15110 | -9.85120  | -0.38080 |
| C | 7.98860  | -8.70900  | -0.94980 |
| C | 10.00590 | -8.39520  | -2.42470 |
| H | 9.68480  | -2.90810  | 1.46480  |
| H | 10.89990 | -3.89810  | 1.91660  |
| H | 9.59160  | -5.75700  | 2.00570  |
| H | 9.53390  | -5.94380  | -1.59120 |
| H | 9.47280  | -7.52380  | 0.91630  |
| H | 13.31310 | -8.03880  | 2.67310  |
| H | 13.75640 | -8.33230  | 0.95780  |
| H | 13.61220 | -6.66210  | 1.55830  |
| H | 7.50130  | -2.63300  | 2.33700  |
| H | 6.86760  | -3.30910  | 0.82540  |
| H | 5.95430  | -3.48350  | 2.33850  |
| H | 5.83360  | -5.98360  | 2.14330  |
| H | 6.65600  | -5.89270  | 0.58270  |
| H | 7.28460  | -6.94790  | 1.86430  |
| H | 6.81480  | -4.90800  | 4.21800  |
| H | 8.23710  | -5.94170  | 4.00490  |
| H | 8.43870  | -4.18660  | 4.15620  |
| H | 9.78940  | -10.72570 | -0.93140 |
| H | 11.24370 | -9.84720  | -0.45560 |
| H | 9.88490  | -9.98440  | 0.67350  |
| H | 7.68240  | -9.54480  | -1.58820 |
| H | 7.61770  | -8.90750  | 0.06190  |
| H | 7.49680  | -7.80440  | -1.31820 |
| H | 9.49610  | -7.57010  | -2.93460 |
| H | 11.08310 | -8.21840  | -2.48270 |
| H | 9.77680  | -9.30300  | -2.99310 |

25. N011'0c\_GP

|   |          |           |          |
|---|----------|-----------|----------|
| N | 9.88050  | -3.69150  | 2.05230  |
| C | 9.11180  | -4.85600  | 1.59700  |
| C | 9.10820  | -4.92300  | 0.05630  |
| N | 9.41020  | -6.09090  | -0.59520 |
| C | 9.76820  | -7.40990  | -0.09100 |
| C | 8.82550  | -8.42310  | -0.74860 |
| O | 8.36860  | -9.33070  | 0.13460  |
| C | 7.48270  | -10.34110 | -0.39630 |
| O | 8.52350  | -8.41370  | -1.92490 |
| O | 8.85540  | -3.91160  | -0.60160 |
| C | 7.65670  | -4.83530  | 2.19560  |
| C | 6.94170  | -3.50280  | 1.89550  |
| C | 7.77790  | -5.01320  | 3.72220  |
| C | 6.82540  | -5.99850  | 1.61780  |
| C | 11.28620 | -7.77130  | -0.32580 |
| C | 11.54920 | -9.21540  | 0.14700  |
| C | 12.14300 | -6.80580  | 0.51650  |
| C | 11.67640 | -7.63320  | -1.81050 |
| H | 9.65480  | -2.89470  | 1.45950  |
| H | 10.87730 | -3.86170  | 1.94560  |
| H | 9.60530  | -5.74010  | 2.01040  |
| H | 9.32000  | -6.01580  | -1.60340 |
| H | 6.59490  | -9.87390  | -0.82770 |
| H | 7.99270  | -10.92630 | -1.16500 |
| H | 7.21760  | -10.96700 | 0.45470  |
| H | 5.92940  | -3.52660  | 2.31520  |
| H | 7.46730  | -2.65990  | 2.35500  |
| H | 6.86530  | -3.31610  | 0.82110  |
| H | 8.41140  | -4.23370  | 4.15300  |
| H | 6.78860  | -4.95880  | 4.19080  |
| H | 8.21320  | -5.98820  | 3.97650  |
| H | 7.30080  | -6.97030  | 1.79850  |
| H | 5.84080  | -6.02600  | 2.09750  |
| H | 6.66110  | -5.89130  | 0.54020  |
| H | 11.03430 | -9.95310  | -0.47700 |
| H | 12.62100 | -9.43330  | 0.09350  |
| H | 11.22670 | -9.36810  | 1.18310  |
| H | 11.93130 | -6.90850  | 1.58750  |
| H | 13.20640 | -7.02170  | 0.36750  |
| H | 11.97370 | -5.76420  | 0.22670  |
| H | 11.56780 | -6.60180  | -2.16120 |
| H | 12.72740 | -7.91270  | -1.94120 |
| H | 11.07210 | -8.27760  | -2.45540 |
| H | 9.58400  | -7.44690  | 0.98220  |

26. N1000c\_GP

|   |          |           |          |
|---|----------|-----------|----------|
| N | 8.41510  | -3.78630  | 2.08140  |
| C | 9.14510  | -4.92900  | 1.57160  |
| C | 9.10860  | -4.92440  | 0.04160  |
| N | 9.41170  | -6.09670  | -0.58830 |
| C | 9.72690  | -7.36720  | 0.02610  |
| C | 10.05690 | -8.37930  | -1.05900 |
| O | 10.38740 | -9.56360  | -0.52180 |
| C | 10.71180 | -10.61770 | -1.45670 |
| O | 10.01990 | -8.14850  | -2.24930 |
| O | 8.85350  | -3.90430  | -0.59380 |
| C | 8.80040  | -3.22540  | 3.39170  |
| C | 8.64350  | -4.31080  | 4.47170  |
| C | 7.81390  | -2.07910  | 3.67240  |
| C | 10.24440 | -2.66810  | 3.40850  |
| H | 8.41140  | -3.06640  | 1.36050  |
| H | 8.71800  | -5.86550  | 1.95310  |
| H | 10.21790 | -4.94440  | 1.84800  |
| H | 9.41720  | -6.07290  | -1.60290 |
| H | 8.89010  | -7.77100  | 0.61230  |
| H | 10.58940 | -7.30420  | 0.70250  |
| H | 11.56960 | -10.32840 | -2.06760 |
| H | 10.94910 | -11.48370 | -0.84050 |
| H | 9.85660  | -10.82370 | -2.10380 |
| H | 9.35290  | -5.13370  | 4.32780  |
| H | 8.82670  | -3.89180  | 5.46670  |
| H | 7.62990  | -4.72450  | 4.45070  |
| H | 6.78630  | -2.45450  | 3.68070  |
| H | 8.02610  | -1.60830  | 4.63820  |
| H | 7.88550  | -1.30480  | 2.89920  |
| H | 10.36440 | -1.88440  | 2.65190  |
| H | 10.48630 | -2.23540  | 4.38590  |
| H | 10.98750 | -3.44770  | 3.20720  |

## 27. N1010c\_GP

|   |          |           |          |
|---|----------|-----------|----------|
| N | 8.30710  | -3.79260  | 2.04680  |
| C | 9.12110  | -4.89920  | 1.57920  |
| C | 9.10830  | -4.92310  | 0.04810  |
| N | 9.41110  | -6.09460  | -0.59150 |
| C | 9.85880  | -7.36600  | -0.03670 |
| C | 11.21040 | -7.69380  | -0.67910 |
| O | 12.10460 | -8.13490  | 0.22540  |
| C | 13.40460 | -8.49440  | -0.29310 |
| O | 11.45230 | -7.57030  | -1.86310 |
| O | 8.85450  | -3.90780  | -0.59710 |
| C | 8.81120  | -8.52930  | -0.23050 |
| C | 8.39550  | -8.66900  | -1.70820 |
| C | 9.42000  | -9.85680  | 0.26420  |
| C | 7.56790  | -8.20010  | 0.61850  |
| C | 8.58880  | -3.22500  | 3.38090  |
| C | 10.00330 | -2.60610  | 3.48740  |
| C | 7.53760  | -2.12500  | 3.60720  |
| C | 8.41520  | -4.32360  | 4.44520  |
| H | 8.31840  | -3.06750  | 1.33150  |
| H | 8.74330  | -5.84410  | 1.98230  |
| H | 10.18790 | -4.83530  | 1.87080  |
| H | 9.49050  | -5.99630  | -1.59800 |
| H | 10.03030 | -7.24900  | 1.03400  |
| H | 13.86940 | -7.63200  | -0.77550 |
| H | 13.98180 | -8.81330  | 0.57370  |
| H | 13.31140 | -9.30640  | -1.01790 |
| H | 7.69170  | -9.50180  | -1.81320 |
| H | 7.89030  | -7.76750  | -2.06940 |
| H | 9.25180  | -8.86550  | -2.35970 |
| H | 9.78890  | -9.77590  | 1.29300  |
| H | 10.25140 | -10.18980 | -0.36600 |
| H | 8.65830  | -10.64320 | 0.24230  |
| H | 7.80780  | -8.16660  | 1.68780  |
| H | 7.12720  | -7.24020  | 0.33370  |
| H | 6.80410  | -8.97210  | 0.47590  |
| H | 10.16600 | -2.16980  | 4.47950  |
| H | 10.79030 | -3.35150  | 3.32840  |
| H | 10.13440 | -1.81240  | 2.74310  |
| H | 7.62040  | -1.34330  | 2.84250  |
| H | 6.52890  | -2.54530  | 3.55300  |
| H | 7.67160  | -1.65160  | 4.58560  |
| H | 9.17070  | -5.11120  | 4.34500  |
| H | 8.51460  | -3.90210  | 5.45100  |
| H | 7.42560  | -4.78400  | 4.35830  |

## 28. N1100c\_GP

|   |          |           |          |
|---|----------|-----------|----------|
| N | 9.72760  | -3.65990  | 2.08210  |
| C | 9.08580  | -4.88360  | 1.59620  |
| C | 9.10840  | -4.92400  | 0.05160  |
| N | 9.41060  | -6.09230  | -0.59290 |
| C | 9.85570  | -7.34990  | -0.03380 |
| C | 10.17760 | -8.31600  | -1.16310 |
| O | 10.55940 | -9.50640  | -0.67370 |
| C | 10.89590 | -10.51670 | -1.65110 |
| O | 10.10170 | -8.05080  | -2.34470 |
| O | 8.85480  | -3.90930  | -0.59930 |
| C | 7.61260  | -4.99400  | 2.16190  |
| C | 7.70290  | -5.12690  | 3.69470  |
| C | 6.90200  | -6.24250  | 1.60110  |
| C | 6.78270  | -3.74360  | 1.81080  |
| C | 11.19620 | -3.63020  | 2.29350  |
| C | 11.53230 | -2.17230  | 2.65650  |
| C | 11.56310 | -4.53630  | 3.48280  |
| C | 12.01690 | -4.03920  | 1.04810  |
| H | 9.47160  | -2.90950  | 1.44300  |
| H | 9.63250  | -5.74380  | 1.99450  |
| H | 9.42190  | -6.03500  | -1.60720 |
| H | 9.09680  | -7.82250  | 0.60000  |
| H | 10.76270 | -7.24400  | 0.57700  |
| H | 11.17640 | -11.39430 | -1.07060 |
| H | 10.03240 | -10.72950 | -2.28490 |
| H | 11.72830 | -10.17830 | -2.27170 |
| H | 6.69820  | -5.17980  | 4.12980  |
| H | 8.23980  | -6.03850  | 3.98670  |
| H | 8.22410  | -4.26930  | 4.12660  |
| H | 5.89460  | -6.31750  | 2.02460  |
| H | 6.79690  | -6.20910  | 0.51170  |
| H | 7.43060  | -7.16480  | 1.87230  |
| H | 6.70000  | -3.59910  | 0.73020  |
| H | 5.77220  | -3.84570  | 2.22320  |
| H | 7.22740  | -2.84270  | 2.24390  |
| H | 12.60050 | -2.06070  | 2.86950  |
| H | 11.28390 | -1.49600  | 1.82990  |
| H | 10.96500 | -1.85730  | 3.53770  |
| H | 12.63240 | -4.45600  | 3.70590  |
| H | 10.99880 | -4.24470  | 4.37370  |
| H | 11.35350 | -5.59220  | 3.27930  |
| H | 11.75660 | -3.41740  | 0.18540  |
| H | 13.09090 | -3.92980  | 1.23780  |
| H | 11.84160 | -5.08480  | 0.77220  |



## 29. N1110c\_GP

|   |          |           |          |
|---|----------|-----------|----------|
| N | 9.70440  | -3.58720  | 2.05170  |
| C | 9.09490  | -4.84370  | 1.60740  |
| C | 9.10770  | -4.92110  | 0.06050  |
| N | 9.41010  | -6.09040  | -0.59760 |
| C | 9.82200  | -7.39290  | -0.09420 |
| C | 11.34750 | -7.44790  | 0.08140  |
| O | 11.68450 | -7.94760  | 1.29050  |
| C | 13.09900 | -8.09370  | 1.54310  |
| O | 12.15980 | -7.09740  | -0.74880 |
| O | 8.85610  | -3.91400  | -0.60340 |
| C | 7.63330  | -4.95760  | 2.20400  |
| C | 7.75470  | -5.03240  | 3.73870  |
| C | 6.92940  | -6.23290  | 1.70600  |
| C | 6.77590  | -3.73460  | 1.82230  |
| C | 9.32120  | -8.56420  | -1.02590 |
| C | 9.85490  | -9.90310  | -0.47430 |
| C | 7.78080  | -8.59770  | -1.00240 |
| C | 9.80270  | -8.39270  | -2.48240 |
| C | 11.17160 | -3.47000  | 2.24220  |
| C | 11.63520 | -4.43930  | 3.34400  |
| C | 11.98690 | -3.70330  | 0.95000  |
| C | 11.40400 | -2.02520  | 2.72280  |
| H | 9.40240  | -2.85980  | 1.40650  |
| H | 9.66870  | -5.67680  | 2.02270  |
| H | 9.50680  | -5.94050  | -1.59520 |
| H | 9.37400  | -7.55090  | 0.88720  |
| H | 13.17190 | -8.49660  | 2.55250  |
| H | 13.54270 | -8.78070  | 0.81860  |
| H | 13.59800 | -7.12500  | 1.47370  |
| H | 8.31140  | -5.92470  | 4.05220  |
| H | 8.27060  | -4.15210  | 4.12880  |
| H | 6.75900  | -5.08480  | 4.19410  |
| H | 5.93620  | -6.31120  | 2.16190  |
| H | 6.79200  | -6.23360  | 0.62090  |
| H | 7.48230  | -7.13740  | 1.98620  |
| H | 6.67590  | -3.62910  | 0.73840  |
| H | 5.77260  | -3.84160  | 2.25080  |
| H | 7.20760  | -2.81080  | 2.21800  |
| H | 9.41990  | -10.73340 | -1.04010 |
| H | 10.94340 | -9.98310  | -0.56330 |
| H | 9.59040  | -10.04040 | 0.57990  |
| H | 7.41910  | -9.39340  | -1.66260 |
| H | 7.39790  | -8.79810  | 0.00360  |
| H | 7.35040  | -7.65380  | -1.34810 |
| H | 9.35110  | -7.52100  | -2.96930 |
| H | 10.88920 | -8.29590  | -2.54910 |
| H | 9.49980  | -9.26800  | -3.06720 |
| H | 12.69140 | -4.26500  | 3.57580  |

|   |          |          |         |
|---|----------|----------|---------|
| H | 11.05230 | -4.28900 | 4.25810 |
| H | 11.53750 | -5.48810 | 3.04420 |
| H | 13.05590 | -3.53740 | 1.12870 |
| H | 11.87570 | -4.72210 | 0.56850 |
| H | 11.66520 | -3.01830 | 0.15860 |
| H | 10.85410 | -1.83520 | 3.64950 |
| H | 12.46880 | -1.84110 | 2.90070 |
| H | 11.06270 | -1.30420 | 1.97020 |

## 30. N111'0c\_GP

|   |          |           |          |
|---|----------|-----------|----------|
| N | 9.66880  | -3.54870  | 2.04850  |
| C | 9.09650  | -4.82330  | 1.60830  |
| C | 9.10750  | -4.92050  | 0.06270  |
| N | 9.41000  | -6.08990  | -0.59870 |
| C | 9.64000  | -7.45090  | -0.13480 |
| C | 8.40360  | -8.30630  | -0.45090 |
| O | 8.16030  | -9.21620  | 0.51300  |
| C | 7.03360  | -10.09120 | 0.28980  |
| O | 7.73410  | -8.19550  | -1.45720 |
| O | 8.85640  | -3.91520  | -0.60450 |
| C | 7.62680  | -4.95560  | 2.19070  |
| C | 7.73780  | -5.04070  | 3.72550  |
| C | 6.93200  | -6.23040  | 1.67910  |
| C | 6.76620  | -3.73390  | 1.81270  |
| C | 10.93890 | -8.09040  | -0.77260 |
| C | 12.15880 | -7.25750  | -0.34030 |
| C | 11.11680 | -9.53260  | -0.25310 |
| C | 10.86400 | -8.11080  | -2.31330 |
| C | 11.11870 | -3.39280  | 2.31450  |
| C | 11.99880 | -3.60200  | 1.06280  |
| C | 11.28960 | -1.94420  | 2.80970  |
| C | 11.55850 | -4.35400  | 3.43310  |
| H | 9.38060  | -2.83920  | 1.37790  |
| H | 9.68060  | -5.64200  | 2.03830  |
| H | 9.24870  | -5.99610  | -1.59610 |
| H | 6.11470  | -9.50730  | 0.20400  |
| H | 7.17880  | -10.67200 | -0.62410 |
| H | 6.99830  | -10.74380 | 1.16130  |
| H | 6.73930  | -5.09920  | 4.17400  |
| H | 8.29490  | -5.93350  | 4.03730  |
| H | 8.24690  | -4.16060  | 4.12500  |
| H | 5.93920  | -6.31610  | 2.13540  |
| H | 6.78740  | -6.21730  | 0.59380  |
| H | 7.48910  | -7.13350  | 1.94970  |
| H | 6.67700  | -3.61820  | 0.72890  |
| H | 5.75900  | -3.85340  | 2.22820  |
| H | 7.18740  | -2.81210  | 2.22330  |
| H | 13.07510 | -7.70580  | -0.73920 |
| H | 12.09630 | -6.23380  | -0.71620 |
| H | 12.25590 | -7.21980  | 0.75110  |
| H | 12.07600 | -9.92980  | -0.60130 |
| H | 11.11510 | -9.57160  | 0.84180  |
| H | 10.33280 | -10.20590 | -0.61170 |
| H | 9.99720  | -8.66840  | -2.67890 |
| H | 10.82150 | -7.10090  | -2.73490 |
| H | 11.76540 | -8.58650  | -2.71470 |
| H | 13.05650 | -3.42560  | 1.29130  |
| H | 11.90940 | -4.62210  | 0.68210  |

|   |          |          |         |
|---|----------|----------|---------|
| H | 11.70310 | -2.91750 | 0.26060 |
| H | 12.34070 | -1.73040 | 3.03130 |
| H | 10.95770 | -1.22980 | 2.04690 |
| H | 10.69750 | -1.77450 | 3.71400 |
| H | 11.51700 | -5.40340 | 3.12130 |
| H | 12.59440 | -4.14550 | 3.72050 |
| H | 10.92400 | -4.23400 | 4.31670 |
| H | 9.77720  | -7.44210 | 0.94760 |

31. N0000c\_WP

|   |          |           |          |
|---|----------|-----------|----------|
| N | 8.78130  | -3.64290  | 2.18740  |
| C | 9.10240  | -4.93770  | 1.58260  |
| C | 9.11140  | -4.93560  | 0.04870  |
| N | 9.40950  | -6.08840  | -0.58840 |
| C | 9.73410  | -7.38210  | -0.00290 |
| C | 10.00370 | -8.37130  | -1.12940 |
| O | 10.31560 | -9.57920  | -0.66020 |
| C | 10.59990 | -10.61880 | -1.64280 |
| O | 9.94110  | -8.08910  | -2.31560 |
| O | 8.85290  | -3.90150  | -0.60090 |
| H | 7.86900  | -3.32530  | 1.85120  |
| H | 9.44540  | -2.93840  | 1.85790  |
| H | 8.38100  | -5.69050  | 1.92850  |
| H | 10.08650 | -5.27150  | 1.93850  |
| H | 9.40500  | -6.04590  | -1.60610 |
| H | 8.91330  | -7.77960  | 0.61100  |
| H | 10.62940 | -7.33760  | 0.63330  |
| H | 10.82190 | -11.51100 | -1.05750 |
| H | 9.72490  | -10.77800 | -2.27670 |
| H | 11.46000 | -10.32820 | -2.24990 |

## 32. N0010c\_WP

|   |          |           |          |
|---|----------|-----------|----------|
| N | 8.42280  | -3.72550  | 2.15140  |
| C | 9.11280  | -4.89130  | 1.59100  |
| C | 9.11100  | -4.93410  | 0.05390  |
| N | 9.40910  | -6.08650  | -0.59110 |
| C | 9.77240  | -7.40220  | -0.05900 |
| C | 11.04750 | -7.84810  | -0.78990 |
| O | 11.87260 | -8.53260  | 0.00460  |
| C | 13.07300 | -9.09800  | -0.59810 |
| O | 11.26960 | -7.61800  | -1.96990 |
| O | 8.85380  | -3.90490  | -0.60340 |
| C | 8.60420  | -8.46760  | -0.20020 |
| C | 7.50420  | -8.12050  | 0.82450  |
| C | 8.00380  | -8.44480  | -1.61950 |
| C | 9.12920  | -9.88610  | 0.10810  |
| H | 7.43720  | -3.74920  | 1.87770  |
| H | 8.79670  | -2.87270  | 1.72920  |
| H | 8.66470  | -5.79700  | 2.00890  |
| H | 10.16230 | -4.88740  | 1.91850  |
| H | 9.44670  | -5.99210  | -1.60510 |
| H | 10.01940 | -7.31240  | 1.00090  |
| H | 12.79980 | -9.74630  | -1.43390 |
| H | 13.72950 | -8.29460  | -0.94020 |
| H | 13.54680 | -9.67250  | 0.19800  |
| H | 6.67710  | -8.83340  | 0.72780  |
| H | 7.88010  | -8.18510  | 1.85310  |
| H | 7.09300  | -7.11830  | 0.66280  |
| H | 7.54090  | -7.47860  | -1.84670 |
| H | 8.75630  | -8.65890  | -2.38610 |
| H | 7.22340  | -9.21060  | -1.69320 |
| H | 8.28450  | -10.58410 | 0.12310  |
| H | 9.83280  | -10.24160 | -0.65290 |
| H | 9.62450  | -9.93520  | 1.08450  |

## 33. N0100c WP

|   |          |           |          |
|---|----------|-----------|----------|
| N | 9.97910  | -3.78860  | 2.06500  |
| C | 9.12650  | -4.90200  | 1.59660  |
| C | 9.11120  | -4.93500  | 0.05410  |
| N | 9.40910  | -6.08650  | -0.59090 |
| C | 9.80510  | -7.37520  | -0.03590 |
| C | 10.11700 | -8.33550  | -1.17500 |
| O | 10.42980 | -9.54560  | -0.71070 |
| C | 10.76500 | -10.57520 | -1.68770 |
| O | 10.08430 | -8.03620  | -2.35830 |
| O | 8.85350  | -3.90400  | -0.60370 |
| C | 7.67380  | -4.85650  | 2.21430  |
| C | 6.99550  | -3.48590  | 2.01380  |
| C | 7.77590  | -5.14890  | 3.72660  |
| C | 6.78820  | -5.94860  | 1.57370  |
| H | 10.94730 | -3.96920  | 1.78790  |
| H | 9.71260  | -2.92840  | 1.58180  |
| H | 9.58960  | -5.82320  | 1.96680  |
| H | 9.40190  | -6.02760  | -1.60820 |
| H | 9.01500  | -7.83080  | 0.57340  |
| H | 10.70360 | -7.29900  | 0.59200  |
| H | 10.96100 | -11.47150 | -1.09920 |
| H | 9.92320  | -10.73200 | -2.36550 |
| H | 11.65410 | -10.27730 | -2.24780 |
| H | 7.55130  | -2.68220  | 2.50870  |
| H | 6.89290  | -3.23310  | 0.95440  |
| H | 5.99170  | -3.51000  | 2.45520  |
| H | 6.77770  | -5.12450  | 4.18030  |
| H | 8.20210  | -6.14280  | 3.90920  |
| H | 8.39870  | -4.40910  | 4.23760  |
| H | 7.21480  | -6.94950  | 1.71150  |
| H | 5.80120  | -5.94950  | 2.05080  |
| H | 6.63300  | -5.78290  | 0.50160  |

## 34. N0110c\_WP

|   |          |           |          |
|---|----------|-----------|----------|
| N | 9.99280  | -3.73140  | 2.02170  |
| C | 9.15770  | -4.87600  | 1.60100  |
| C | 9.11040  | -4.93190  | 0.05660  |
| N | 9.40930  | -6.08750  | -0.59290 |
| C | 9.71550  | -7.40960  | -0.04710 |
| C | 11.18350 | -7.49000  | 0.41110  |
| O | 11.29940 | -8.23650  | 1.51640  |
| C | 12.63360 | -8.47170  | 2.04820  |
| O | 12.12320 | -6.94460  | -0.14580 |
| O | 8.85410  | -3.90610  | -0.60420 |
| C | 7.73400  | -4.85630  | 2.27810  |
| C | 7.00480  | -3.51580  | 2.05790  |
| C | 6.85490  | -5.99680  | 1.71870  |
| C | 7.91610  | -5.09200  | 3.79300  |
| C | 9.33890  | -8.54540  | -1.07850 |
| C | 9.63590  | -9.92680  | -0.45580 |
| C | 7.82320  | -8.45770  | -1.36400 |
| C | 10.12710 | -8.40860  | -2.39790 |
| H | 9.66120  | -2.88250  | 1.55910  |
| H | 10.94920 | -3.86270  | 1.68300  |
| H | 9.65770  | -5.77420  | 1.97610  |
| H | 9.45760  | -5.97390  | -1.60290 |
| H | 9.09890  | -7.58530  | 0.83580  |
| H | 12.48460 | -9.12180  | 2.91100  |
| H | 13.25440 | -8.96430  | 1.29610  |
| H | 13.08630 | -7.52500  | 2.35210  |
| H | 7.55750  | -2.67450  | 2.48990  |
| H | 6.84030  | -3.31260  | 0.99540  |
| H | 6.02610  | -3.55170  | 2.55140  |
| H | 5.87990  | -5.98620  | 2.21980  |
| H | 6.67080  | -5.89480  | 0.64330  |
| H | 7.29800  | -6.98230  | 1.90590  |
| H | 6.93870  | -5.09350  | 4.29000  |
| H | 8.39110  | -6.06120  | 3.98850  |
| H | 8.52950  | -4.31150  | 4.25190  |
| H | 9.26830  | -10.70800 | -1.13050 |
| H | 10.70740 | -10.09670 | -0.30770 |
| H | 9.13170  | -10.05150 | 0.50970  |
| H | 7.54190  | -9.24940  | -2.06740 |
| H | 7.23640  | -8.59990  | -0.44880 |
| H | 7.53810  | -7.49910  | -1.80870 |
| H | 9.91200  | -7.47280  | -2.92820 |
| H | 11.20790 | -8.46880  | -2.23390 |
| H | 9.84320  | -9.22660  | -3.06970 |



## 35. N011'0c\_WP

|   |          |           |          |
|---|----------|-----------|----------|
| N | 9.94040  | -3.66900  | 2.01030  |
| C | 9.15890  | -4.85620  | 1.60430  |
| C | 9.11060  | -4.93260  | 0.05970  |
| N | 9.40880  | -6.08540  | -0.59410 |
| C | 9.65330  | -7.44710  | -0.10400 |
| C | 8.82700  | -8.38140  | -1.00360 |
| O | 8.28260  | -9.39250  | -0.32560 |
| C | 7.53310  | -10.38470 | -1.08700 |
| O | 8.69440  | -8.21590  | -2.20760 |
| O | 8.85440  | -3.90750  | -0.60610 |
| C | 7.73920  | -4.88930  | 2.28800  |
| C | 6.95090  | -3.58570  | 2.05540  |
| C | 7.94270  | -5.09360  | 3.80520  |
| C | 6.91000  | -6.07700  | 1.75240  |
| C | 11.18140 | -7.85980  | -0.06810 |
| C | 11.30410 | -9.34900  | 0.32230  |
| C | 11.89650 | -7.01820  | 1.00880  |
| C | 11.86170 | -7.62080  | -1.42900 |
| H | 9.60050  | -2.85170  | 1.49930  |
| H | 10.91400 | -3.78040  | 1.71730  |
| H | 9.69760  | -5.72630  | 1.98490  |
| H | 9.37850  | -5.99100  | -1.60870 |
| H | 6.68210  | -9.90980  | -1.58030 |
| H | 8.18560  | -10.85440 | -1.82690 |
| H | 7.19680  | -11.11380 | -0.34980 |
| H | 5.98260  | -3.65100  | 2.56600  |
| H | 7.47710  | -2.71460  | 2.46060  |
| H | 6.76090  | -3.41070  | 0.99220  |
| H | 8.51510  | -4.27390  | 4.24820  |
| H | 6.97030  | -5.14250  | 4.30940  |
| H | 8.47270  | -6.03180  | 4.01110  |
| H | 7.40040  | -7.03730  | 1.95050  |
| H | 5.93790  | -6.10440  | 2.25800  |
| H | 6.71690  | -6.00020  | 0.67640  |
| H | 10.92230 | -10.01650 | -0.45770 |
| H | 12.36070 | -9.59510  | 0.47740  |
| H | 10.76810 | -9.56890  | 1.25320  |
| H | 11.47070 | -7.18920  | 2.00490  |
| H | 12.95410 | -7.30190  | 1.04940  |
| H | 11.85570 | -5.94720  | 0.78500  |
| H | 11.82220 | -6.56510  | -1.71920 |
| H | 12.91750 | -7.90600  | -1.35950 |
| H | 11.40550 | -8.21690  | -2.22590 |
| H | 9.26450  | -7.54680  | 0.90970  |

36. N1000c\_WP

|   |          |           |          |
|---|----------|-----------|----------|
| N | 8.66480  | -3.69770  | 2.13700  |
| C | 9.14120  | -4.95960  | 1.57110  |
| C | 9.11110  | -4.93440  | 0.04630  |
| N | 9.41040  | -6.09170  | -0.58760 |
| C | 9.74580  | -7.36410  | 0.03540  |
| C | 10.31580 | -8.31360  | -1.00690 |
| O | 10.66540 | -9.47530  | -0.45210 |
| C | 11.22860 | -10.50080 | -1.32200 |
| O | 10.43200 | -8.04780  | -2.19280 |
| O | 8.85230  | -3.89950  | -0.59920 |
| C | 8.78950  | -3.55020  | 3.62000  |
| C | 7.84020  | -4.54160  | 4.31750  |
| C | 8.35220  | -2.11140  | 3.94570  |
| C | 10.23270 | -3.76470  | 4.13180  |
| H | 9.18570  | -2.93710  | 1.69560  |
| H | 8.51080  | -5.78750  | 1.91830  |
| H | 10.17620 | -5.21460  | 1.86000  |
| H | 9.42370  | -6.05810  | -1.60550 |
| H | 8.86940  | -7.84880  | 0.49070  |
| H | 10.49840 | -7.24250  | 0.82500  |
| H | 12.15110 | -10.13440 | -1.77730 |
| H | 11.43150 | -11.34740 | -0.66580 |
| H | 10.50380 | -10.77250 | -2.09240 |
| H | 8.12870  | -5.58270  | 4.13610  |
| H | 7.86270  | -4.38000  | 5.40080  |
| H | 6.80910  | -4.40260  | 3.97330  |
| H | 7.32400  | -1.93080  | 3.61260  |
| H | 8.40060  | -1.93270  | 5.02540  |
| H | 9.00770  | -1.38110  | 3.45460  |
| H | 10.93350 | -3.09330  | 3.62080  |
| H | 10.28630 | -3.55390  | 5.20610  |
| H | 10.57300 | -4.79540  | 3.98470  |

## 37. N1010c\_WP

|   |          |           |          |
|---|----------|-----------|----------|
| N | 8.34370  | -3.80580  | 2.11590  |
| C | 9.13900  | -4.91290  | 1.58020  |
| C | 9.11070  | -4.93270  | 0.05190  |
| N | 9.41000  | -6.09000  | -0.59060 |
| C | 9.77550  | -7.39150  | -0.02500 |
| C | 11.07320 | -7.84800  | -0.70630 |
| O | 11.88420 | -8.48530  | 0.14200  |
| C | 13.11240 | -9.05650  | -0.39380 |
| O | 11.32680 | -7.66490  | -1.88740 |
| O | 8.85320  | -3.90280  | -0.60180 |
| C | 8.62190  | -8.47140  | -0.14840 |
| C | 8.14160  | -8.61430  | -1.60570 |
| C | 9.12050  | -9.83840  | 0.36770  |
| C | 7.43900  | -8.02320  | 0.73530  |
| C | 8.08650  | -3.84350  | 3.58990  |
| C | 9.37150  | -4.04930  | 4.42310  |
| C | 7.45890  | -2.48640  | 3.95200  |
| C | 7.07720  | -4.96380  | 3.90750  |
| H | 8.82360  | -2.93170  | 1.89480  |
| H | 8.74710  | -5.85050  | 1.97580  |
| H | 10.20510 | -4.87770  | 1.86790  |
| H | 9.44620  | -6.00780  | -1.60550 |
| H | 10.00040 | -7.26960  | 1.03570  |
| H | 13.75100 | -8.26330  | -0.78870 |
| H | 13.58790 | -9.55070  | 0.45370  |
| H | 12.87450 | -9.77830  | -1.17860 |
| H | 7.34170  | -9.36200  | -1.65030 |
| H | 7.73430  | -7.67380  | -1.99320 |
| H | 8.94520  | -8.94540  | -2.27140 |
| H | 9.53210  | -9.76300  | 1.38110  |
| H | 9.88610  | -10.27580 | -0.28180 |
| H | 8.27780  | -10.53860 | 0.40000  |
| H | 7.72080  | -7.99000  | 1.79460  |
| H | 7.05410  | -7.04120  | 0.44130  |
| H | 6.61810  | -8.74250  | 0.63610  |
| H | 9.14290  | -3.98990  | 5.49340  |
| H | 9.82280  | -5.03020  | 4.23730  |
| H | 10.11620 | -3.27790  | 4.19250  |
| H | 8.15240  | -1.66290  | 3.74080  |
| H | 6.53780  | -2.31820  | 3.38260  |
| H | 7.21330  | -2.45380  | 5.01890  |
| H | 7.48320  | -5.95970  | 3.69920  |
| H | 6.81390  | -4.93810  | 4.97080  |
| H | 6.15910  | -4.83540  | 3.32370  |

## 38. N1100c\_WP

|   |          |           |          |
|---|----------|-----------|----------|
| N | 9.68940  | -3.57380  | 2.05240  |
| C | 9.10980  | -4.84770  | 1.61430  |
| C | 9.11020  | -4.93130  | 0.06300  |
| N | 9.40850  | -6.08420  | -0.59590 |
| C | 9.75240  | -7.40060  | -0.09000 |
| C | 8.68810  | -8.45180  | -0.41760 |
| O | 8.84670  | -9.54320  | 0.34020  |
| C | 7.93470  | -10.65870 | 0.11780  |
| O | 7.82740  | -8.33010  | -1.27280 |
| O | 8.85510  | -3.91000  | -0.60760 |
| C | 7.66550  | -5.04250  | 2.23980  |
| C | 7.81690  | -5.07790  | 3.77470  |
| C | 7.04050  | -6.37590  | 1.78760  |
| C | 6.72730  | -3.88140  | 1.85970  |
| C | 11.12420 | -3.49860  | 2.43400  |
| C | 11.41250 | -2.00720  | 2.68640  |
| C | 11.36240 | -4.27500  | 3.74380  |
| C | 12.08140 | -4.02440  | 1.33970  |
| H | 9.48410  | -2.86090  | 1.35470  |
| H | 9.72140  | -5.66070  | 2.01540  |
| H | 9.40740  | -5.98470  | -1.61060 |
| H | 9.91760  | -7.38470  | 0.98790  |
| H | 10.69000 | -7.74530  | -0.55070 |
| H | 8.23900  | -11.42150 | 0.83460  |
| H | 6.90690  | -10.34100 | 0.30660  |
| H | 8.03620  | -11.02610 | -0.90570 |
| H | 6.83520  | -5.21600  | 4.24330  |
| H | 8.45890  | -5.90890  | 4.09240  |
| H | 8.25230  | -4.14770  | 4.14730  |
| H | 6.06580  | -6.51130  | 2.27020  |
| H | 6.87600  | -6.41220  | 0.70590  |
| H | 7.66460  | -7.22960  | 2.07960  |
| H | 6.54120  | -3.84240  | 0.78160  |
| H | 5.76140  | -4.00670  | 2.36430  |
| H | 7.14730  | -2.92010  | 2.17240  |
| H | 12.45000 | -1.86510  | 3.00830  |
| H | 11.25820 | -1.41660  | 1.77470  |
| H | 10.75050 | -1.61570  | 3.46650  |
| H | 12.40800 | -4.16980  | 4.05540  |
| H | 10.72240 | -3.88720  | 4.54280  |
| H | 11.16120 | -5.34640  | 3.63250  |
| H | 11.93270 | -3.48260  | 0.39840  |
| H | 13.12590 | -3.89330  | 1.64690  |
| H | 11.92940 | -5.09350  | 1.15030  |

## 39. N1110c\_WP

|   |          |           |          |
|---|----------|-----------|----------|
| N | 9.78720  | -3.64260  | 2.07590  |
| C | 9.08950  | -4.84730  | 1.61290  |
| C | 9.10970  | -4.92940  | 0.06510  |
| N | 9.40890  | -6.08550  | -0.59730 |
| C | 9.85440  | -7.39320  | -0.11210 |
| C | 11.39160 | -7.47700  | -0.15740 |
| O | 11.88620 | -8.07880  | 0.93130  |
| C | 13.32040 | -8.32860  | 0.97520  |
| O | 12.07980 | -7.06440  | -1.07800 |
| O | 8.85520  | -3.91050  | -0.60830 |
| C | 7.62050  | -4.88360  | 2.21330  |
| C | 7.74840  | -5.01610  | 3.74530  |
| C | 6.83630  | -6.09920  | 1.69060  |
| C | 6.83700  | -3.59830  | 1.88670  |
| C | 9.21240  | -8.58880  | -0.93050 |
| C | 9.80680  | -9.92340  | -0.42750 |
| C | 7.69140  | -8.61490  | -0.68330 |
| C | 9.47170  | -8.45850  | -2.44600 |
| C | 11.22310 | -3.68080  | 2.45390  |
| C | 11.44040 | -4.64120  | 3.63870  |
| C | 12.15330 | -4.07220  | 1.28470  |
| C | 11.56930 | -2.25060  | 2.90900  |
| H | 9.63050  | -2.88770  | 1.41040  |
| H | 9.60070  | -5.72210  | 2.02200  |
| H | 9.45540  | -5.94370  | -1.60490 |
| H | 9.54660  | -7.51530  | 0.92780  |
| H | 13.49580 | -8.81180  | 1.93660  |
| H | 13.60670 | -8.98880  | 0.15280  |
| H | 13.86800 | -7.38630  | 0.90960  |
| H | 8.26260  | -5.94520  | 4.02170  |
| H | 8.30700  | -4.17640  | 4.16600  |
| H | 6.75220  | -5.03600  | 4.20320  |
| H | 5.84990  | -6.13720  | 2.16790  |
| H | 6.67530  | -6.05430  | 0.60900  |
| H | 7.34760  | -7.03920  | 1.92760  |
| H | 6.67780  | -3.48180  | 0.81050  |
| H | 5.85430  | -3.63660  | 2.37240  |
| H | 7.36020  | -2.71170  | 2.25780  |
| H | 9.26840  | -10.75480 | -0.89560 |
| H | 10.86600 | -10.03460 | -0.68470 |
| H | 9.70440  | -10.02620 | 0.65920  |
| H | 7.24580  | -9.43150  | -1.26250 |
| H | 7.45940  | -8.79050  | 0.37250  |
| H | 7.21140  | -7.68270  | -0.99420 |
| H | 8.98820  | -7.57350  | -2.87680 |
| H | 10.53940 | -8.42020  | -2.68140 |
| H | 9.04720  | -9.33180  | -2.95390 |
| H | 12.48430 | -4.59200  | 3.96730  |

|   |          |          |         |
|---|----------|----------|---------|
| H | 10.79940 | -4.36510 | 4.48200 |
| H | 11.23320 | -5.68490 | 3.37800 |
| H | 13.20510 | -4.03920 | 1.59310 |
| H | 11.94860 | -5.08700 | 0.93220 |
| H | 12.02210 | -3.38780 | 0.43850 |
| H | 10.94700 | -1.95770 | 3.76120 |
| H | 12.62190 | -2.18660 | 3.20580 |
| H | 11.40260 | -1.53090 | 2.09780 |

40. N111'0c\_WP

|   |          |           |          |
|---|----------|-----------|----------|
| N | 9.66800  | -3.56240  | 2.06820  |
| C | 9.11770  | -4.84190  | 1.61400  |
| C | 9.10980  | -4.92960  | 0.06480  |
| N | 9.40880  | -6.08520  | -0.59720 |
| C | 9.60260  | -7.45730  | -0.12470 |
| C | 8.40100  | -8.29840  | -0.59270 |
| O | 8.09360  | -9.26800  | 0.27180  |
| C | 7.01090  | -10.17390 | -0.08420 |
| O | 7.80740  | -8.10900  | -1.64410 |
| O | 8.85530  | -3.91070  | -0.60820 |
| C | 7.67010  | -5.03810  | 2.24200  |
| C | 7.84190  | -5.16880  | 3.76940  |
| C | 6.98590  | -6.31690  | 1.72500  |
| C | 6.76210  | -3.83160  | 1.93520  |
| C | 10.97310 | -8.08850  | -0.60590 |
| C | 12.12530 | -7.22600  | -0.05810 |
| C | 11.12170 | -9.51460  | -0.03180 |
| C | 11.06850 | -8.14090  | -2.14370 |
| C | 11.10910 | -3.38360  | 2.37910  |
| C | 12.01990 | -3.48330  | 1.13580  |
| C | 11.22900 | -1.96420  | 2.96770  |
| C | 11.56230 | -4.39790  | 3.44540  |
| H | 9.37330  | -2.82880  | 1.42630  |
| H | 9.73560  | -5.65170  | 2.01150  |
| H | 9.31050  | -5.98270  | -1.60590 |
| H | 6.07970  | -9.61480  | -0.20030 |
| H | 7.25380  | -10.69910 | -1.01090 |
| H | 6.94090  | -10.87340 | 0.74910  |
| H | 6.86390  | -5.29280  | 4.24960  |
| H | 8.45420  | -6.04310  | 4.02420  |
| H | 8.32440  | -4.28050  | 4.18410  |
| H | 6.01070  | -6.43370  | 2.21160  |
| H | 6.80330  | -6.28330  | 0.64520  |
| H | 7.56960  | -7.21330  | 1.95840  |
| H | 6.59050  | -3.71630  | 0.85990  |
| H | 5.78790  | -3.97380  | 2.41820  |
| H | 7.19410  | -2.90240  | 2.31840  |
| H | 13.08430 | -7.68190  | -0.32880 |
| H | 12.10530 | -6.21790  | -0.47920 |
| H | 12.08830 | -7.15130  | 1.03530  |
| H | 12.12400 | -9.89120  | -0.26530 |
| H | 11.00470 | -9.52320  | 1.05840  |
| H | 10.39750 | -10.21620 | -0.45670 |
| H | 10.29070 | -8.77400  | -2.58300 |
| H | 10.99970 | -7.14440  | -2.59530 |
| H | 12.03960 | -8.56010  | -2.43010 |
| H | 13.06890 | -3.31000  | 1.40540  |
| H | 11.95650 | -4.47130  | 0.67410  |

|   |          |          |         |
|---|----------|----------|---------|
| H | 11.73160 | -2.73760 | 0.38580 |
| H | 12.27290 | -1.73510 | 3.21000 |
| H | 10.87730 | -1.21330 | 2.24910 |
| H | 10.62920 | -1.87360 | 3.87930 |
| H | 11.54910 | -5.43000 | 3.07850 |
| H | 12.59150 | -4.17570 | 3.74910 |
| H | 10.92190 | -4.34050 | 4.33170 |
| H | 9.61330  | -7.46450 | 0.96620 |



41. N0000\_Anti120GP

|   |          |           |          |
|---|----------|-----------|----------|
| N | 8.78610  | -3.74660  | 2.27810  |
| C | 9.11430  | -4.96140  | 1.55800  |
| C | 9.10040  | -4.89210  | 0.03860  |
| N | 9.42600  | -6.15290  | -0.59610 |
| C | 8.33580  | -6.67700  | -1.42700 |
| C | 8.89840  | -7.65100  | -2.44430 |
| O | 7.94660  | -8.48100  | -2.90440 |
| C | 8.35320  | -9.40210  | -3.93970 |
| O | 10.05160 | -7.65380  | -2.82390 |
| O | 8.84740  | -3.88050  | -0.58300 |
| H | 7.86240  | -3.41380  | 2.01370  |
| H | 9.43530  | -3.00310  | 2.03430  |
| H | 8.43280  | -5.77250  | 1.84980  |
| H | 10.10900 | -5.32080  | 1.85360  |
| H | 10.22970 | -6.00680  | -1.21160 |
| H | 7.81630  | -5.88990  | -1.99880 |
| H | 7.59000  | -7.18700  | -0.80990 |
| H | 7.45940  | -9.97610  | -4.18060 |
| H | 8.71010  | -8.85420  | -4.81470 |
| H | 9.14710  | -10.05570 | -3.57200 |

42. N0010\_Anti120GP

|   |          |           |          |
|---|----------|-----------|----------|
| N | 8.95610  | -3.71310  | 2.26990  |
| C | 9.25490  | -4.93170  | 1.54410  |
| C | 9.10100  | -4.89420  | 0.02810  |
| N | 9.42730  | -6.15790  | -0.59090 |
| C | 8.40590  | -6.91730  | -1.35070 |
| C | 9.02610  | -8.31460  | -1.44170 |
| O | 8.23480  | -9.25670  | -0.89160 |
| C | 8.74910  | -10.60510 | -0.91310 |
| O | 10.11050 | -8.55230  | -1.93560 |
| O | 8.84560  | -3.87340  | -0.57770 |
| C | 7.93290  | -6.40030  | -2.76810 |
| C | 6.85720  | -5.30750  | -2.59620 |
| C | 9.11260  | -5.84750  | -3.58860 |
| C | 7.28580  | -7.57990  | -3.53130 |
| H | 7.98040  | -3.45460  | 2.14910  |
| H | 9.50250  | -2.93890  | 1.90110  |
| H | 8.64490  | -5.76130  | 1.92560  |
| H | 10.29120 | -5.24270  | 1.73620  |
| H | 10.24640 | -6.02940  | -1.18470 |
| H | 7.52020  | -6.99850  | -0.71290 |
| H | 8.90350  | -10.93630 | -1.94270 |
| H | 9.69660  | -10.65610 | -0.37200 |
| H | 7.98910  | -11.21160 | -0.42190 |
| H | 6.48870  | -4.99480  | -3.58000 |
| H | 5.99750  | -5.68610  | -2.02890 |
| H | 7.24830  | -4.42490  | -2.08880 |
| H | 9.52300  | -4.94040  | -3.13380 |
| H | 9.91330  | -6.58680  | -3.69300 |
| H | 8.76920  | -5.58020  | -4.59410 |
| H | 6.84550  | -7.21550  | -4.46550 |
| H | 8.01590  | -8.35260  | -3.79360 |
| H | 6.48430  | -8.04760  | -2.94790 |

43. N0100\_Anti120GP

|   |          |          |          |
|---|----------|----------|----------|
| N | 10.61200 | -5.26030 | 1.91720  |
| C | 9.20300  | -4.98640 | 1.57570  |
| C | 9.09930  | -4.88780 | 0.05040  |
| N | 9.42590  | -6.15230 | -0.60250 |
| C | 8.34390  | -6.62880 | -1.47150 |
| C | 8.90590  | -7.59770 | -2.49340 |
| O | 7.94600  | -8.39790 | -2.98880 |
| C | 8.35410  | -9.30990 | -4.03110 |
| O | 10.06700 | -7.62170 | -2.84840 |
| O | 8.84870  | -3.88540 | -0.58840 |
| C | 8.61730  | -3.80680 | 2.40300  |
| C | 9.42190  | -2.50510 | 2.20430  |
| C | 8.66590  | -4.20560 | 3.89370  |
| C | 7.14490  | -3.57580 | 2.00270  |
| H | 10.90420 | -6.14740 | 1.51600  |
| H | 11.22920 | -4.53350 | 1.56370  |
| H | 8.64650  | -5.89180 | 1.85180  |
| H | 10.23900 | -6.00200 | -1.20420 |
| H | 7.86130  | -5.81530 | -2.03850 |
| H | 7.56830  | -7.12930 | -0.88380 |
| H | 7.45390  | -9.86180 | -4.29840 |
| H | 8.73850  | -8.75530 | -4.89010 |
| H | 9.12770  | -9.98530 | -3.65970 |
| H | 10.45560 | -2.61580 | 2.55130  |
| H | 9.43110  | -2.19180 | 1.15740  |
| H | 8.97270  | -1.69860 | 2.79480  |
| H | 8.26840  | -3.39350 | 4.51280  |
| H | 8.05760  | -5.09820 | 4.08550  |
| H | 9.68850  | -4.42010 | 4.21320  |
| H | 6.56130  | -4.50160 | 2.08890  |
| H | 6.68720  | -2.83980 | 2.67310  |
| H | 7.05360  | -3.20370 | 0.97960  |

44. N0110\_Anti120GP

|   |          |           |          |
|---|----------|-----------|----------|
| N | 10.76100 | -5.11850  | 1.79710  |
| C | 9.31550  | -4.95210  | 1.55970  |
| C | 9.10000  | -4.89040  | 0.03950  |
| N | 9.42720  | -6.15740  | -0.59700 |
| C | 8.41440  | -6.86250  | -1.41870 |
| C | 8.98590  | -8.28150  | -1.49600 |
| O | 8.13380  | -9.19940  | -0.99770 |
| C | 8.59770  | -10.56590 | -1.01000 |
| O | 10.08540 | -8.55580  | -1.93550 |
| O | 8.84670  | -3.87780  | -0.58300 |
| C | 8.71260  | -3.79510  | 2.40800  |
| C | 9.43390  | -2.45330  | 2.16250  |
| C | 7.21150  | -3.64780  | 2.08360  |
| C | 8.86130  | -4.17810  | 3.89620  |
| C | 8.03160  | -6.31630  | -2.85360 |
| C | 7.40670  | -7.47210  | -3.67080 |
| C | 6.96690  | -5.20640  | -2.72930 |
| C | 9.26680  | -5.77600  | -3.59700 |
| H | 11.30140 | -4.37030  | 1.37040  |
| H | 11.08510 | -6.00510  | 1.42120  |
| H | 8.84630  | -5.88490  | 1.89610  |
| H | 10.26760 | -6.03650  | -1.16070 |
| H | 7.49540  | -6.91730  | -0.82690 |
| H | 7.79210  | -11.14800 | -0.56410 |
| H | 8.79040  | -10.89250 | -2.03460 |
| H | 9.51450  | -10.65870 | -0.42370 |
| H | 10.48780 | -2.50670  | 2.45810  |
| H | 9.37440  | -2.14810  | 1.11500  |
| H | 8.97130  | -1.66820  | 2.77140  |
| H | 6.74740  | -2.93570  | 2.77490  |
| H | 7.04760  | -3.28460  | 1.06620  |
| H | 6.68520  | -4.60430  | 2.19920  |
| H | 8.46540  | -3.37840  | 4.53240  |
| H | 8.30400  | -5.09410  | 4.12810  |
| H | 9.90920  | -4.34480  | 4.15800  |
| H | 7.02710  | -7.08520  | -4.62230 |
| H | 8.13510  | -8.25570  | -3.90340 |
| H | 6.56420  | -7.93140  | -3.14100 |
| H | 6.66280  | -4.87370  | -3.72860 |
| H | 6.06890  | -5.57760  | -2.21910 |
| H | 7.34260  | -4.33970  | -2.18510 |
| H | 9.66780  | -4.88400  | -3.10530 |
| H | 10.05740 | -6.53020  | -3.66750 |
| H | 8.98730  | -5.48760  | -4.61640 |

## 45. N011'0\_Anti120GP

|   |          |          |          |
|---|----------|----------|----------|
| N | 10.60650 | -5.22390 | 1.92610  |
| C | 9.19300  | -4.98470 | 1.57490  |
| C | 9.09930  | -4.88790 | 0.04780  |
| N | 9.42650  | -6.15480 | -0.60140 |
| C | 8.33470  | -6.62270 | -1.48500 |
| C | 8.41850  | -5.90980 | -2.83860 |
| O | 7.21270  | -5.51720 | -3.28550 |
| C | 7.20180  | -4.81650 | -4.54710 |
| O | 9.45730  | -5.72880 | -3.44500 |
| O | 8.84800  | -3.88280 | -0.58690 |
| C | 8.57460  | -3.81780 | 2.39710  |
| C | 9.35450  | -2.49950 | 2.20990  |
| C | 8.61420  | -4.21770 | 3.88780  |
| C | 7.10250  | -3.61650 | 1.98010  |
| C | 8.35240  | -8.18680 | -1.62460 |
| C | 7.25770  | -8.63100 | -2.61590 |
| C | 8.04590  | -8.78820 | -0.23900 |
| C | 9.72480  | -8.69250 | -2.10940 |
| H | 11.20900 | -4.48710 | 1.56790  |
| H | 10.92190 | -6.10810 | 1.53670  |
| H | 8.65560  | -5.90120 | 1.84930  |
| H | 10.23840 | -5.99200 | -1.20160 |
| H | 7.81080  | -3.91280 | -4.47740 |
| H | 7.59210  | -5.45670 | -5.34180 |
| H | 6.15720  | -4.56710 | -4.72940 |
| H | 8.88150  | -1.70340 | 2.79580  |
| H | 10.38580 | -2.58980 | 2.56970  |
| H | 9.37050  | -2.18500 | 1.16340  |
| H | 9.63700  | -4.41420 | 4.21810  |
| H | 8.19600  | -3.41370 | 4.50400  |
| H | 8.01970  | -5.12110 | 4.07240  |
| H | 6.53690  | -4.55410 | 2.05890  |
| H | 6.62180  | -2.89060 | 2.64540  |
| H | 7.01560  | -3.24580 | 0.95610  |
| H | 7.46960  | -8.30340 | -3.63890 |
| H | 7.19150  | -9.72420 | -2.62860 |
| H | 6.27440  | -8.23800 | -2.33450 |
| H | 7.04820  | -8.49570 | 0.11080  |
| H | 8.07260  | -9.88240 | -0.28800 |
| H | 8.78010  | -8.46050 | 0.50180  |
| H | 10.51440 | -8.44400 | -1.39320 |
| H | 9.70160  | -9.78320 | -2.20990 |
| H | 9.99700  | -8.26830 | -3.08030 |
| H | 7.37850  | -6.35000 | -1.02730 |

46. N1000\_Anti120GP

|   |          |          |          |
|---|----------|----------|----------|
| N | 8.62350  | -3.75210 | 2.15810  |
| C | 9.14490  | -4.95390 | 1.54530  |
| C | 9.10060  | -4.89290 | 0.03840  |
| N | 9.42580  | -6.15220 | -0.59580 |
| C | 8.34710  | -6.65540 | -1.45530 |
| C | 8.92610  | -7.60690 | -2.48400 |
| O | 7.98770  | -8.44150 | -2.96310 |
| C | 8.41340  | -9.34340 | -4.00710 |
| O | 10.08210 | -7.59030 | -2.85600 |
| O | 8.84740  | -3.88040 | -0.58310 |
| C | 9.06030  | -3.40460 | 3.52650  |
| C | 8.64490  | -4.53320 | 4.48730  |
| C | 8.31390  | -2.11310 | 3.90080  |
| C | 10.58460 | -3.15910 | 3.62960  |
| H | 8.74900  | -2.96810 | 1.52210  |
| H | 8.58430  | -5.84920 | 1.84880  |
| H | 10.20110 | -5.18830 | 1.78340  |
| H | 10.24200 | -6.00740 | -1.19520 |
| H | 7.83930  | -5.85400 | -2.01720 |
| H | 7.59060  | -7.17630 | -0.86090 |
| H | 9.20990  | -9.99490 | -3.64070 |
| H | 7.52740  | -9.92240 | -4.26500 |
| H | 8.77390  | -8.77990 | -4.87090 |
| H | 9.17510  | -5.46740 | 4.27180  |
| H | 8.87420  | -4.25830 | 5.52220  |
| H | 7.56960  | -4.72330 | 4.40880  |
| H | 7.23220  | -2.26750 | 3.84520  |
| H | 8.57280  | -1.79320 | 4.91550  |
| H | 8.57640  | -1.29710 | 3.21650  |
| H | 10.89370 | -2.35300 | 2.95420  |
| H | 10.86610 | -2.87120 | 4.64870  |
| H | 11.16250 | -4.05460 | 3.37590  |

## 47. N1010\_Anti120GP

|   |          |           |          |
|---|----------|-----------|----------|
| N | 8.75720  | -3.72770  | 2.16150  |
| C | 9.24190  | -4.93570  | 1.53170  |
| C | 9.10130  | -4.89530  | 0.02700  |
| N | 9.42710  | -6.15740  | -0.59010 |
| C | 8.42850  | -6.88220  | -1.40960 |
| C | 9.03010  | -8.28730  | -1.49970 |
| O | 8.18930  | -9.23020  | -1.03140 |
| C | 8.67930  | -10.58700 | -1.06380 |
| O | 10.14080 | -8.53060  | -1.92900 |
| O | 8.84540  | -3.87280  | -0.57740 |
| C | 8.02860  | -6.33390  | -2.83920 |
| C | 9.25090  | -5.76670  | -3.58350 |
| C | 7.42040  | -7.49370  | -3.66250 |
| C | 6.94550  | -5.24400  | -2.69870 |
| C | 9.25700  | -3.37790  | 3.50740  |
| C | 10.78320 | -3.12590  | 3.53620  |
| C | 8.52380  | -2.08990  | 3.91770  |
| C | 8.89410  | -4.50720  | 4.48820  |
| H | 8.86090  | -2.94740  | 1.51710  |
| H | 8.70920  | -5.82720  | 1.88940  |
| H | 10.31440 | -5.16100  | 1.69710  |
| H | 10.28860 | -6.05750  | -1.12590 |
| H | 7.51420  | -6.95880  | -0.81340 |
| H | 9.58820  | -10.67480 | -0.46430 |
| H | 7.87780  | -11.19330 | -0.64320 |
| H | 8.89460  | -10.88890 | -2.09160 |
| H | 8.96140  | -5.47320  | -4.59870 |
| H | 9.64060  | -4.87390  | -3.08460 |
| H | 10.05320 | -6.50750  | -3.66510 |
| H | 6.58820  | -7.97170  | -3.13330 |
| H | 8.16160  | -8.26280  | -3.90420 |
| H | 7.03090  | -7.10600  | -4.60980 |
| H | 6.05570  | -5.63640  | -2.19010 |
| H | 7.30670  | -4.37650  | -2.14550 |
| H | 6.63270  | -4.90480  | -3.69320 |
| H | 11.11450 | -2.84190  | 4.54140  |
| H | 11.35070 | -4.01750  | 3.24820  |
| H | 11.05470 | -2.31490  | 2.85070  |
| H | 8.74530  | -1.27410  | 3.21900  |
| H | 7.44170  | -2.25070  | 3.91870  |
| H | 8.83320  | -1.76600  | 4.91700  |
| H | 9.42420  | -5.43680  | 4.25410  |
| H | 9.16380  | -4.22550  | 5.51140  |
| H | 7.81850  | -4.70830  | 4.45600  |

## 48. N1100\_Anti120GP

|   |          |          |          |
|---|----------|----------|----------|
| N | 10.01280 | -3.72750 | 2.03890  |
| C | 9.20170  | -4.86370 | 1.59000  |
| C | 9.09980  | -4.89010 | 0.05260  |
| N | 9.42470  | -6.14760 | -0.60290 |
| C | 8.31830  | -6.75980 | -1.34990 |
| C | 8.88000  | -7.59670 | -2.48420 |
| O | 7.97810  | -8.49430 | -2.91840 |
| C | 8.37650  | -9.30050 | -4.04790 |
| O | 9.98680  | -7.45370 | -2.96310 |
| O | 8.84930  | -3.88780 | -0.59020 |
| C | 7.78900  | -4.85310 | 2.29270  |
| C | 8.01460  | -5.08490 | 3.79920  |
| C | 6.90900  | -5.99240 | 1.74260  |
| C | 7.06730  | -3.50790 | 2.08760  |
| C | 11.48770 | -3.87560 | 2.13920  |
| C | 12.02900 | -2.46840 | 2.44620  |
| C | 11.82700 | -4.81090 | 3.31420  |
| C | 12.14930 | -4.40490 | 0.84630  |
| H | 9.79250  | -2.92170 | 1.45820  |
| H | 9.69340  | -5.79220 | 1.88750  |
| H | 10.13820 | -5.92620 | -1.30270 |
| H | 7.65010  | -6.01490 | -1.81420 |
| H | 7.70930  | -7.39670 | -0.70450 |
| H | 7.52700  | -9.95160 | -4.25000 |
| H | 8.59180  | -8.66480 | -4.90980 |
| H | 9.26390  | -9.88650 | -3.79870 |
| H | 7.05960  | -5.04070 | 4.33540  |
| H | 8.45860  | -6.06980 | 3.98920  |
| H | 8.67970  | -4.32260 | 4.21210  |
| H | 5.99040  | -6.07560 | 2.33380  |
| H | 6.60470  | -5.81190 | 0.70590  |
| H | 7.42250  | -6.96010 | 1.79100  |
| H | 6.90980  | -3.28510 | 1.02800  |
| H | 6.08690  | -3.53600 | 2.57700  |
| H | 7.63620  | -2.68540 | 2.53120  |
| H | 13.11480 | -2.49280 | 2.58270  |
| H | 11.81210 | -1.77560 | 1.62390  |
| H | 11.57220 | -2.07150 | 3.35810  |
| H | 12.91230 | -4.87480 | 3.44700  |
| H | 11.38460 | -4.43610 | 4.24210  |
| H | 11.46000 | -5.82910 | 3.14800  |
| H | 11.91950 | -3.75590 | -0.00640 |
| H | 13.23920 | -4.44120 | 0.95430  |
| H | 11.81310 | -5.42070 | 0.61100  |



## 49. N1110\_Anti120GP

|   |          |           |          |
|---|----------|-----------|----------|
| N | 10.02910 | -3.67690  | 1.99590  |
| C | 9.26210  | -4.85320  | 1.57740  |
| C | 9.10040  | -4.89200  | 0.04120  |
| N | 9.42620  | -6.15380  | -0.59730 |
| C | 8.45090  | -6.94370  | -1.38630 |
| C | 9.18010  | -8.27750  | -1.57210 |
| O | 8.46520  | -9.31590  | -1.09540 |
| C | 9.07770  | -10.61640 | -1.21980 |
| O | 10.27990 | -8.39560  | -2.07640 |
| O | 8.84720  | -3.87970  | -0.58440 |
| C | 7.87670  | -4.90960  | 2.33310  |
| C | 8.16910  | -5.13680  | 3.82870  |
| C | 7.02420  | -6.08170  | 1.81070  |
| C | 7.09210  | -3.59470  | 2.16390  |
| C | 7.91420  | -6.38500  | -2.76500 |
| C | 7.32530  | -7.56170  | -3.57800 |
| C | 6.77480  | -5.37660  | -2.50930 |
| C | 9.03470  | -5.71210  | -3.57850 |
| C | 11.51100 | -3.75380  | 2.05800  |
| C | 11.92560 | -4.65360  | 3.23670  |
| C | 12.16410 | -4.27230  | 0.75600  |
| C | 11.99450 | -2.31830  | 2.32900  |
| H | 9.75530  | -2.88820  | 1.41450  |
| H | 9.80690  | -5.75690  | 1.85750  |
| H | 10.24560 | -5.99360  | -1.18390 |
| H | 7.58690  | -7.13920  | -0.74920 |
| H | 8.36960  | -11.31300 | -0.77230 |
| H | 9.24570  | -10.85840 | -2.27200 |
| H | 10.03200 | -10.63750 | -0.68870 |
| H | 8.65920  | -6.10350  | 3.99670  |
| H | 8.81760  | -4.34920  | 4.21990  |
| H | 7.23430  | -5.13320  | 4.40110  |
| H | 6.13770  | -6.21060  | 2.44130  |
| H | 6.66480  | -5.90160  | 0.79170  |
| H | 7.58000  | -7.02620  | 1.82040  |
| H | 6.88800  | -3.37120  | 1.11210  |
| H | 6.13060  | -3.66850  | 2.68510  |
| H | 7.64030  | -2.75170  | 2.59470  |
| H | 6.83580  | -7.17770  | -4.47930 |
| H | 8.09730  | -8.26750  | -3.90180 |
| H | 6.57420  | -8.11490  | -3.00290 |
| H | 6.36570  | -5.03070  | -3.46550 |
| H | 5.95310  | -5.84220  | -1.95060 |
| H | 7.12030  | -4.50090  | -1.95850 |
| H | 9.40050  | -4.81030  | -3.07790 |
| H | 9.87640  | -6.39220  | -3.74440 |
| H | 8.64870  | -5.40980  | -4.55870 |
| H | 13.01630 | -4.67050  | 3.33700  |

|   |          |          |          |
|---|----------|----------|----------|
| H | 11.49630 | -4.28140 | 4.17170  |
| H | 11.59560 | -5.68850 | 3.09860  |
| H | 13.25680 | -4.25250 | 0.83490  |
| H | 11.87530 | -5.30870 | 0.54880  |
| H | 11.87900 | -3.65160 | -0.10080 |
| H | 11.54070 | -1.92710 | 3.24490  |
| H | 13.08320 | -2.29090 | 2.44070  |
| H | 11.72710 | -1.65040 | 1.50110  |

50. N111'0\_Anti120GP

|   |          |           |          |
|---|----------|-----------|----------|
| N | 10.19430 | -3.83830  | 2.00050  |
| C | 9.22620  | -4.86310  | 1.58860  |
| C | 9.09960  | -4.88910  | 0.05010  |
| N | 9.42610  | -6.15290  | -0.60210 |
| C | 8.30940  | -6.76710  | -1.35820 |
| C | 8.12300  | -6.04660  | -2.69810 |
| O | 6.83180  | -5.75190  | -2.93870 |
| C | 6.56060  | -5.05340  | -4.17200 |
| O | 9.03080  | -5.77650  | -3.46050 |
| O | 8.84820  | -3.88350  | -0.58850 |
| C | 7.84850  | -4.65410  | 2.32670  |
| C | 8.08120  | -4.91310  | 3.82820  |
| C | 6.80420  | -5.66170  | 1.80840  |
| C | 7.31080  | -3.22310  | 2.13820  |
| C | 8.53380  | -8.31110  | -1.53910 |
| C | 8.47470  | -8.96820  | -0.14600 |
| C | 7.40430  | -8.89210  | -2.41450 |
| C | 9.89840  | -8.61510  | -2.18710 |
| C | 11.63770 | -4.16700  | 2.11140  |
| C | 12.24020 | -4.77260  | 0.82330  |
| C | 12.34390 | -2.83600  | 2.42450  |
| C | 11.85370 | -5.13670  | 3.28780  |
| H | 10.07260 | -3.01390  | 1.41770  |
| H | 9.60160  | -5.84250  | 1.89110  |
| H | 10.13930 | -5.92330  | -1.29900 |
| H | 7.10030  | -4.10430  | -4.19050 |
| H | 6.86480  | -5.66050  | -5.02810 |
| H | 5.48370  | -4.88810  | -4.17910 |
| H | 7.15630  | -4.73800  | 4.38970  |
| H | 8.39170  | -5.94900  | 4.01230  |
| H | 8.85410  | -4.24750  | 4.22030  |
| H | 5.89990  | -5.61580  | 2.42530  |
| H | 6.49880  | -5.44130  | 0.77960  |
| H | 7.17860  | -6.69140  | 1.84860  |
| H | 7.15180  | -2.98290  | 1.08330  |
| H | 6.35230  | -3.11810  | 2.65960  |
| H | 8.00020  | -2.48590  | 2.56060  |
| H | 8.66250  | -10.04450 | -0.22910 |
| H | 9.22730  | -8.53900  | 0.52060  |
| H | 7.48860  | -8.83790  | 0.31560  |
| H | 7.48890  | -9.98350  | -2.45300 |
| H | 6.41500  | -8.64640  | -2.01240 |
| H | 7.45040  | -8.52370  | -3.44490 |
| H | 9.99880  | -8.14410  | -3.16900 |
| H | 10.72270 | -8.27100  | -1.55430 |
| H | 10.01160 | -9.69740  | -2.31510 |
| H | 13.31790 | -4.93640  | 0.93680  |
| H | 11.78430 | -5.73980  | 0.58850  |

|   |          |          |          |
|---|----------|----------|----------|
| H | 12.09290 | -4.10150 | -0.03100 |
| H | 13.41830 | -2.99210 | 2.56460  |
| H | 12.21580 | -2.12010 | 1.60340  |
| H | 11.93490 | -2.38870 | 3.33570  |
| H | 11.37040 | -6.10420 | 3.11740  |
| H | 12.92290 | -5.32830 | 3.42850  |
| H | 11.45260 | -4.71300 | 4.21330  |
| H | 7.38870  | -6.64220 | -0.78530 |

51. N0000\_Anti-120GP

|   |          |          |          |
|---|----------|----------|----------|
| N | 8.79550  | -3.74440 | 2.27830  |
| C | 9.09680  | -4.96590 | 1.55790  |
| C | 9.10040  | -4.89210 | 0.03870  |
| N | 9.42600  | -6.15280 | -0.59620 |
| C | 10.64950 | -6.09040 | -1.40420 |
| C | 10.63700 | -7.20920 | -2.42800 |
| O | 11.87750 | -7.48470 | -2.86570 |
| C | 11.97750 | -8.48290 | -3.90460 |
| O | 9.63120  | -7.75740 | -2.83010 |
| O | 8.84740  | -3.88050 | -0.58300 |
| H | 7.87590  | -3.39690 | 2.01860  |
| H | 9.45540  | -3.01180 | 2.02980  |
| H | 8.38790  | -5.75640 | 1.83830  |
| H | 10.07700 | -5.35640 | 1.86470  |
| H | 8.66160  | -6.40190 | -1.22840 |
| H | 11.53660 | -6.18750 | -0.77110 |
| H | 10.74230 | -5.14780 | -1.96930 |
| H | 13.04100 | -8.56130 | -4.12600 |
| H | 11.58340 | -9.43750 | -3.54920 |
| H | 11.41930 | -8.16630 | -4.78850 |

52. N0010\_Anti-120GP

|   |          |          |          |
|---|----------|----------|----------|
| N | 8.81270  | -3.74140 | 2.27730  |
| C | 9.11140  | -4.96340 | 1.55630  |
| C | 9.10040  | -4.89200 | 0.03570  |
| N | 9.42680  | -6.15600 | -0.59490 |
| C | 10.64670 | -6.08460 | -1.43040 |
| C | 10.30160 | -5.50580 | -2.80640 |
| O | 11.21010 | -4.60790 | -3.22630 |
| C | 10.95290 | -3.99950 | -4.50970 |
| O | 9.32110  | -5.82820 | -3.44940 |
| O | 8.84660  | -3.87760 | -0.58130 |
| C | 11.35020 | -7.48540 | -1.52480 |
| C | 11.84900 | -7.85850 | -0.11490 |
| C | 10.37680 | -8.56940 | -2.02630 |
| C | 12.55950 | -7.39390 | -2.47790 |
| H | 7.89130  | -3.39570 | 2.02160  |
| H | 9.46970  | -3.00860 | 2.02160  |
| H | 8.40790  | -5.75570 | 1.84550  |
| H | 10.09640 | -5.34790 | 1.85410  |
| H | 8.65090  | -6.40250 | -1.21360 |
| H | 11.35280 | -5.39870 | -0.95200 |
| H | 10.93450 | -4.75960 | -5.29440 |
| H | 9.99470  | -3.47570 | -4.48950 |
| H | 11.77370 | -3.30080 | -4.66730 |
| H | 12.32500 | -8.84520 | -0.13190 |
| H | 12.59220 | -7.13790 | 0.24860  |
| H | 11.02040 | -7.88960 | 0.59750  |
| H | 9.53790  | -8.69850 | -1.33500 |
| H | 9.97380  | -8.33150 | -3.01500 |
| H | 10.89890 | -9.53010 | -2.09500 |
| H | 13.11800 | -8.33580 | -2.45820 |
| H | 12.25510 | -7.21500 | -3.51460 |
| H | 13.24520 | -6.59050 | -2.18580 |

## 53. N0100\_Anti-120GP

|   |          |          |          |
|---|----------|----------|----------|
| N | 9.57920  | -3.64450 | 2.14720  |
| C | 9.11860  | -4.91310 | 1.57860  |
| C | 9.10010  | -4.89110 | 0.04680  |
| N | 9.42530  | -6.15010 | -0.60000 |
| C | 10.61450 | -6.05120 | -1.45590 |
| C | 10.58770 | -7.16300 | -2.48670 |
| O | 11.81770 | -7.41330 | -2.96890 |
| C | 11.89890 | -8.40180 | -4.01820 |
| O | 9.57920  | -7.72780 | -2.85890 |
| O | 8.84840  | -3.88430 | -0.58720 |
| C | 7.71790  | -5.31980 | 2.18410  |
| C | 6.69860  | -4.17760 | 2.00370  |
| C | 7.92470  | -5.59000 | 3.68750  |
| C | 7.17320  | -6.59860 | 1.51710  |
| H | 10.58190 | -3.54210 | 2.01690  |
| H | 9.14180  | -2.86700 | 1.65760  |
| H | 9.82390  | -5.69890 | 1.87020  |
| H | 8.64500  | -6.40950 | -1.20850 |
| H | 11.52830 | -6.13170 | -0.85930 |
| H | 10.66220 | -5.10260 | -2.01640 |
| H | 12.95590 | -8.46360 | -4.27350 |
| H | 11.52940 | -9.36460 | -3.65870 |
| H | 11.30900 | -8.08640 | -4.88180 |
| H | 7.00370  | -3.27950 | 2.54930  |
| H | 6.56130  | -3.91180 | 0.95020  |
| H | 5.72450  | -4.48700 | 2.39890  |
| H | 6.96360  | -5.80710 | 4.16760  |
| H | 8.57960  | -6.45530 | 3.84580  |
| H | 8.37420  | -4.72430 | 4.18000  |
| H | 7.90600  | -7.41110 | 1.53330  |
| H | 6.27710  | -6.93630 | 2.04950  |
| H | 6.88020  | -6.43080 | 0.47450  |

## 54. N0110\_Anti-120GP

|   |          |          |          |
|---|----------|----------|----------|
| N | 9.58470  | -3.64050 | 2.14140  |
| C | 9.11980  | -4.91010 | 1.57780  |
| C | 9.10010  | -4.89110 | 0.04400  |
| N | 9.42610  | -6.15300 | -0.59880 |
| C | 10.63110 | -6.05300 | -1.45480 |
| C | 10.26930 | -5.42490 | -2.80490 |
| O | 11.16730 | -4.50200 | -3.19420 |
| C | 10.89670 | -3.84540 | -4.45040 |
| O | 9.28980  | -5.73320 | -3.45620 |
| O | 8.84770  | -3.88140 | -0.58570 |
| C | 7.71900  | -5.30890 | 2.18710  |
| C | 6.70180  | -4.16620 | 1.99990  |
| C | 7.17080  | -6.59140 | 1.53040  |
| C | 7.92680  | -5.56920 | 3.69210  |
| C | 11.32780 | -7.45200 | -1.60970 |
| C | 12.52230 | -7.33070 | -2.57820 |
| C | 11.84820 | -7.87630 | -0.22230 |
| C | 10.34360 | -8.51560 | -2.13330 |
| H | 9.15630  | -2.86450 | 1.64110  |
| H | 10.58890 | -3.54600 | 2.01640  |
| H | 9.82360  | -5.69570 | 1.87250  |
| H | 8.64570  | -6.39210 | -1.21520 |
| H | 11.34910 | -5.38780 | -0.96490 |
| H | 11.71210 | -3.13550 | -4.58640 |
| H | 10.87720 | -4.57390 | -5.26450 |
| H | 9.93550  | -3.32900 | -4.40230 |
| H | 7.01260  | -3.26370 | 2.53490  |
| H | 6.56080  | -3.91040 | 0.94440  |
| H | 5.72860  | -4.46840 | 2.40300  |
| H | 6.27290  | -6.92210 | 2.06410  |
| H | 6.88080  | -6.43150 | 0.48570  |
| H | 7.90120  | -7.40620 | 1.55700  |
| H | 6.96630  | -5.78450 | 4.17440  |
| H | 8.58350  | -6.43230 | 3.85620  |
| H | 8.37540  | -4.69970 | 4.17840  |
| H | 13.07700 | -8.27490 | -2.60170 |
| H | 12.20190 | -7.11340 | -3.60270 |
| H | 13.21600 | -6.54100 | -2.26840 |
| H | 12.31910 | -8.86390 | -0.28130 |
| H | 12.60040 | -7.17190 | 0.15400  |
| H | 11.03110 | -7.92840 | 0.50210  |
| H | 9.51580  | -8.66760 | -1.43360 |
| H | 9.92540  | -8.24150 | -3.10610 |
| H | 10.86210 | -9.47440 | -2.24450 |



## 55. N011'0\_Anti-120GP

|   |          |           |          |
|---|----------|-----------|----------|
| N | 9.46170  | -3.69160  | 2.18780  |
| C | 9.01580  | -4.94230  | 1.56730  |
| C | 9.10090  | -4.89370  | 0.03500  |
| N | 9.42670  | -6.15550  | -0.59410 |
| C | 10.65940 | -6.29510  | -1.40720 |
| C | 10.80470 | -7.81570  | -1.51680 |
| O | 11.97610 | -8.25180  | -1.01270 |
| C | 12.18980 | -9.67860  | -1.05520 |
| O | 9.95970  | -8.55270  | -1.98580 |
| O | 8.84630  | -3.87630  | -0.58140 |
| C | 7.56760  | -5.32370  | 2.07190  |
| C | 6.58960  | -4.15210  | 1.85530  |
| C | 7.67570  | -5.62790  | 3.57980  |
| C | 7.02950  | -6.57500  | 1.35000  |
| C | 10.76560 | -5.60030  | -2.82500 |
| C | 11.86060 | -6.32110  | -3.64670 |
| C | 11.20230 | -4.12950  | -2.65890 |
| C | 9.42920  | -5.66770  | -3.58600 |
| H | 9.07530  | -2.89810  | 1.68090  |
| H | 10.47320 | -3.61010  | 2.13040  |
| H | 9.68300  | -5.74560  | 1.89700  |
| H | 8.63230  | -6.46170  | -1.15520 |
| H | 11.41120 | -10.19420 | -0.48820 |
| H | 12.17860 | -10.03380 | -2.08830 |
| H | 13.16810 | -9.83740  | -0.60250 |
| H | 5.58590  | -4.44510  | 2.18350  |
| H | 6.88260  | -3.27420  | 2.43910  |
| H | 6.52430  | -3.86040  | 0.80190  |
| H | 8.11850  | -4.78440  | 4.11500  |
| H | 6.68160  | -5.82560  | 3.99710  |
| H | 8.29580  | -6.51460  | 3.75950  |
| H | 7.73950  | -7.40690  | 1.38910  |
| H | 6.09790  | -6.90010  | 1.82620  |
| H | 6.79480  | -6.37830  | 0.29740  |
| H | 11.57500 | -7.34560  | -3.90700 |
| H | 12.03150 | -5.78110  | -4.58420 |
| H | 12.81400 | -6.35590  | -3.10680 |
| H | 12.16440 | -4.06140  | -2.13510 |
| H | 11.33320 | -3.66980  | -3.64550 |
| H | 10.46430 | -3.54350  | -2.11050 |
| H | 8.65810  | -5.07300  | -3.08650 |
| H | 9.55710  | -5.25690  | -4.59390 |
| H | 9.07430  | -6.69870  | -3.68710 |
| H | 11.49380 | -5.93500  | -0.79740 |

56. N1000\_Anti-120GP

|   |          |          |          |
|---|----------|----------|----------|
| N | 8.61520  | -3.74830 | 2.15510  |
| C | 9.11780  | -4.95950 | 1.54650  |
| C | 9.10070  | -4.89320 | 0.03890  |
| N | 9.42560  | -6.15130 | -0.59590 |
| C | 10.67650 | -6.10280 | -1.36220 |
| C | 10.67780 | -7.21360 | -2.39470 |
| O | 11.92740 | -7.51190 | -2.79050 |
| C | 12.04340 | -8.50420 | -3.83330 |
| O | 9.67600  | -7.73800 | -2.83620 |
| O | 8.84750  | -3.88100 | -0.58350 |
| C | 9.06710  | -3.39270 | 3.51560  |
| C | 8.68590  | -4.52620 | 4.48470  |
| C | 8.30680  | -2.11280 | 3.90150  |
| C | 10.58910 | -3.12350 | 3.59140  |
| H | 8.73360  | -2.97020 | 1.51070  |
| H | 8.53020  | -5.84160 | 1.83470  |
| H | 10.16420 | -5.21930 | 1.80460  |
| H | 8.67830  | -6.37540 | -1.25720 |
| H | 11.54000 | -6.22050 | -0.70080 |
| H | 10.80470 | -5.15790 | -1.91660 |
| H | 11.52270 | -8.16990 | -4.73340 |
| H | 13.11230 | -8.60240 | -4.01850 |
| H | 11.61830 | -9.45310 | -3.49950 |
| H | 9.23010  | -5.45130 | 4.26470  |
| H | 8.92410  | -4.24370 | 5.51550  |
| H | 7.61340  | -4.73650 | 4.42160  |
| H | 7.22720  | -2.28700 | 3.87090  |
| H | 8.58280  | -1.78350 | 4.90880  |
| H | 8.53860  | -1.29560 | 3.20760  |
| H | 10.87130 | -2.30670 | 2.91700  |
| H | 10.88790 | -2.84030 | 4.60690  |
| H | 11.17510 | -4.00780 | 3.31680  |

## 57. N1010\_Anti-120GP

|   |          |          |          |
|---|----------|----------|----------|
| N | 8.74830  | -3.74350 | 2.24660  |
| C | 9.04320  | -4.98160 | 1.55170  |
| C | 9.10050  | -4.89240 | 0.03660  |
| N | 9.42660  | -6.15530 | -0.59520 |
| C | 10.66040 | -6.08490 | -1.40970 |
| C | 10.34120 | -5.49730 | -2.78830 |
| O | 11.26180 | -4.60300 | -3.18900 |
| C | 11.02950 | -3.98740 | -4.47370 |
| O | 9.36940  | -5.81090 | -3.44900 |
| O | 8.84670  | -3.87780 | -0.58190 |
| C | 11.35820 | -7.48910 | -1.50000 |
| C | 10.38760 | -8.56490 | -2.02390 |
| C | 12.58470 | -7.40010 | -2.43090 |
| C | 11.82970 | -7.87290 | -0.08370 |
| C | 9.86580  | -3.00800 | 2.89060  |
| C | 11.04070 | -2.71520 | 1.92870  |
| C | 9.27040  | -1.67840 | 3.38270  |
| C | 10.36580 | -3.81540 | 4.10260  |
| H | 8.26860  | -3.11950 | 1.60130  |
| H | 8.27970  | -5.74950 | 1.76220  |
| H | 9.98010  | -5.43470 | 1.89340  |
| H | 8.66070  | -6.38920 | -1.23130 |
| H | 11.36200 | -5.40530 | -0.91600 |
| H | 10.07480 | -3.45710 | -4.46690 |
| H | 11.85760 | -3.29380 | -4.61510 |
| H | 11.01860 | -4.74410 | -5.26180 |
| H | 10.90500 | -9.52850 | -2.08750 |
| H | 9.53540  | -8.69150 | -1.34880 |
| H | 10.00430 | -8.31990 | -3.01880 |
| H | 13.26970 | -6.60230 | -2.12280 |
| H | 12.29970 | -7.21450 | -3.47190 |
| H | 13.13720 | -8.34550 | -2.40620 |
| H | 12.57120 | -7.15940 | 0.29660  |
| H | 10.98810 | -7.90240 | 0.61360  |
| H | 12.29920 | -8.86280 | -0.09740 |
| H | 11.82510 | -2.14120 | 2.43540  |
| H | 11.50320 | -3.63880 | 1.56180  |
| H | 10.70060 | -2.14060 | 1.06110  |
| H | 8.90440  | -1.07730 | 2.54140  |
| H | 8.43230  | -1.86300 | 4.06170  |
| H | 10.02500 | -1.08680 | 3.91110  |
| H | 10.80170 | -4.77590 | 3.80610  |
| H | 11.14200 | -3.25930 | 4.63940  |
| H | 9.53950  | -4.01680 | 4.79110  |

## 58. N1100\_Anti-120GP

|   |          |          |          |
|---|----------|----------|----------|
| N | 9.40300  | -3.62480 | 2.16440  |
| C | 9.05840  | -4.92020 | 1.58010  |
| C | 9.10020  | -4.89130 | 0.04850  |
| N | 9.42500  | -6.14860 | -0.60070 |
| C | 10.64950 | -6.08370 | -1.40910 |
| C | 10.58700 | -7.14160 | -2.49410 |
| O | 11.81330 | -7.44620 | -2.95200 |
| C | 11.86960 | -8.39260 | -4.04100 |
| O | 9.55770  | -7.62470 | -2.92050 |
| O | 8.84870  | -3.88560 | -0.58830 |
| C | 7.64050  | -5.41130 | 2.10350  |
| C | 7.75950  | -5.62750 | 3.62440  |
| C | 7.22190  | -6.74450 | 1.45140  |
| C | 6.56350  | -4.34620 | 1.82320  |
| C | 10.81910 | -3.33210 | 2.50160  |
| C | 10.85490 | -1.84870 | 2.90910  |
| C | 11.24870 | -4.19220 | 3.70420  |
| C | 11.79900 | -3.55640 | 1.32670  |
| H | 9.05270  | -2.89570 | 1.54690  |
| H | 9.77820  | -5.67890 | 1.90110  |
| H | 8.66640  | -6.36380 | -1.25310 |
| H | 11.53590 | -6.25140 | -0.79120 |
| H | 10.77570 | -5.11510 | -1.92100 |
| H | 12.92930 | -8.51220 | -4.26310 |
| H | 11.42680 | -9.34380 | -3.73750 |
| H | 11.33310 | -8.00310 | -4.90930 |
| H | 6.78690  | -5.91630 | 4.03900  |
| H | 8.47150  | -6.42860 | 3.85740  |
| H | 8.09180  | -4.71350 | 4.12200  |
| H | 6.32380  | -7.12630 | 1.95000  |
| H | 6.97430  | -6.63290 | 0.39070  |
| H | 8.00580  | -7.50370 | 1.53170  |
| H | 6.45910  | -4.13880 | 0.75280  |
| H | 5.59230  | -4.69730 | 2.19000  |
| H | 6.79420  | -3.40700 | 2.33420  |
| H | 11.86250 | -1.55570 | 3.22130  |
| H | 10.56430 | -1.20410 | 2.07070  |
| H | 10.16510 | -1.66340 | 3.73810  |
| H | 12.27130 | -3.94050 | 4.00560  |
| H | 10.58330 | -4.02010 | 4.55520  |
| H | 11.23200 | -5.26230 | 3.47180  |
| H | 11.51100 | -2.95990 | 0.45470  |
| H | 12.81850 | -3.27280 | 1.61130  |
| H | 11.83090 | -4.61010 | 1.02730  |

## 59. N1110\_Anti-120GP

|   |          |          |          |
|---|----------|----------|----------|
| N | 9.41840  | -3.59790 | 2.14390  |
| C | 9.08580  | -4.90660 | 1.58130  |
| C | 9.10010  | -4.89100 | 0.04600  |
| N | 9.42570  | -6.15170 | -0.59970 |
| C | 10.63130 | -6.07010 | -1.45630 |
| C | 10.27680 | -5.43130 | -2.80370 |
| O | 11.18420 | -4.51410 | -3.18690 |
| C | 10.91860 | -3.84570 | -4.43790 |
| O | 9.29470  | -5.72440 | -3.45810 |
| O | 8.84800  | -3.88290 | -0.58680 |
| C | 7.68270  | -5.41040 | 2.13360  |
| C | 7.82440  | -5.60040 | 3.65610  |
| C | 7.27260  | -6.75990 | 1.51050  |
| C | 6.58640  | -4.36540 | 1.85270  |
| C | 11.29870 | -7.48260 | -1.62120 |
| C | 12.49160 | -7.37840 | -2.59370 |
| C | 11.81630 | -7.92680 | -0.23890 |
| C | 10.29280 | -8.52440 | -2.14790 |
| C | 10.82370 | -3.29440 | 2.51510  |
| C | 11.21920 | -4.11870 | 3.75390  |
| C | 11.83830 | -3.55230 | 1.37750  |
| C | 10.84740 | -1.79990 | 2.88020  |
| H | 9.08320  | -2.88350 | 1.50150  |
| H | 9.82240  | -5.65080 | 1.89740  |
| H | 8.64370  | -6.38830 | -1.21470 |
| H | 11.36170 | -5.42110 | -0.96710 |
| H | 11.73910 | -3.14080 | -4.56830 |
| H | 10.89400 | -4.56750 | -5.25790 |
| H | 9.96110  | -3.32300 | -4.38620 |
| H | 8.55510  | -6.38300 | 3.89390  |
| H | 8.14390  | -4.67200 | 4.13480  |
| H | 6.86280  | -5.90130 | 4.08730  |
| H | 6.38600  | -7.14450 | 2.02690  |
| H | 7.00940  | -6.66940 | 0.45140  |
| H | 8.06680  | -7.50810 | 1.59620  |
| H | 6.45830  | -4.18140 | 0.78050  |
| H | 5.62710  | -4.72030 | 2.24620  |
| H | 6.81660  | -3.41330 | 2.33920  |
| H | 13.02840 | -8.33260 | -2.62500 |
| H | 12.17120 | -7.14930 | -3.61550 |
| H | 13.20110 | -6.60360 | -2.28200 |
| H | 12.26360 | -8.92480 | -0.30640 |
| H | 12.58680 | -7.24290 | 0.13760  |
| H | 11.00190 | -7.96430 | 0.48930  |
| H | 9.46690  | -8.66880 | -1.44430 |
| H | 9.87340  | -8.23450 | -3.11560 |
| H | 10.79400 | -9.49100 | -2.27080 |
| H | 12.23780 | -3.86680 | 4.06860  |

|   |          |          |         |
|---|----------|----------|---------|
| H | 10.53870 | -3.91330 | 4.58530 |
| H | 11.19640 | -5.19540 | 3.55530 |
| H | 12.84670 | -3.24700 | 1.67900 |
| H | 11.88860 | -4.61650 | 1.12210 |
| H | 11.56990 | -2.99250 | 0.47530 |
| H | 10.13050 | -1.59020 | 3.68010 |
| H | 11.84450 | -1.49860 | 3.21760 |
| H | 10.58600 | -1.17970 | 2.01420 |

## 60. N111'0\_Anti-120GP

|   |          |           |          |
|---|----------|-----------|----------|
| N | 9.31030  | -3.67480  | 2.19890  |
| C | 8.96100  | -4.94730  | 1.56670  |
| C | 9.10080  | -4.89340  | 0.03740  |
| N | 9.42640  | -6.15440  | -0.59520 |
| C | 10.68080 | -6.31970  | -1.37070 |
| C | 10.81760 | -7.84350  | -1.44870 |
| O | 11.95900 | -8.27960  | -0.87770 |
| C | 12.16090 | -9.70850  | -0.88280 |
| O | 9.99240  | -8.58350  | -1.94680 |
| O | 8.84670  | -3.87780  | -0.58260 |
| C | 7.49410  | -5.39120  | 1.99080  |
| C | 7.51900  | -5.65510  | 3.50920  |
| C | 7.05330  | -6.68600  | 1.27900  |
| C | 6.47820  | -4.27350  | 1.68710  |
| C | 10.82320 | -5.65380  | -2.79790 |
| C | 11.23090 | -4.17310  | -2.65020 |
| C | 11.95500 | -6.37750  | -3.56530 |
| C | 9.51430  | -5.75590  | -3.60210 |
| C | 10.70760 | -3.44220  | 2.64440  |
| C | 11.76240 | -3.69590  | 1.54330  |
| C | 10.77220 | -1.96570  | 3.07240  |
| C | 11.01230 | -4.33040  | 3.86480  |
| H | 9.02880  | -2.92170  | 1.57510  |
| H | 9.63120  | -5.73460  | 1.92210  |
| H | 8.64610  | -6.42700  | -1.19210 |
| H | 11.35000 | -10.20680 | -0.34670 |
| H | 12.19810 | -10.08360 | -1.90830 |
| H | 13.11370 | -9.86720  | -0.37870 |
| H | 6.51310  | -5.91010  | 3.86200  |
| H | 8.18100  | -6.49380  | 3.75670  |
| H | 7.86280  | -4.77100  | 4.05100  |
| H | 6.11670  | -7.04300  | 1.72170  |
| H | 6.85810  | -6.53120  | 0.21220  |
| H | 7.79890  | -7.48140  | 1.37270  |
| H | 6.44400  | -4.02720  | 0.62060  |
| H | 5.47470  | -4.59590  | 1.98720  |
| H | 6.71660  | -3.36200  | 2.24260  |
| H | 11.38500 | -3.73240  | -3.64210 |
| H | 10.46550 | -3.58940  | -2.13770 |
| H | 12.17370 | -4.07670  | -2.09730 |
| H | 12.15400 | -5.85410  | -4.50670 |
| H | 12.88840 | -6.39020  | -2.99050 |
| H | 11.69050 | -7.41030  | -3.81460 |
| H | 9.17420  | -6.79270  | -3.69030 |
| H | 8.71920  | -5.15830  | -3.14460 |
| H | 9.67190  | -5.36650  | -4.61410 |
| H | 12.76860 | -3.45590  | 1.90510  |
| H | 11.77480 | -4.74770  | 1.23590  |

|   |          |          |          |
|---|----------|----------|----------|
| H | 11.56460 | -3.08070 | 0.65910  |
| H | 11.76430 | -1.71790 | 3.46350  |
| H | 10.57260 | -1.30100 | 2.22300  |
| H | 10.02980 | -1.75990 | 3.84960  |
| H | 10.96530 | -5.39660 | 3.61940  |
| H | 12.02100 | -4.12690 | 4.24060  |
| H | 10.29670 | -4.13570 | 4.66890  |
| H | 11.50240 | -5.95380 | -0.74930 |



61. N0000\_Syn60GP

|   |          |           |          |
|---|----------|-----------|----------|
| N | 10.46030 | -5.16780  | 2.06520  |
| C | 9.10730  | -4.85740  | 1.59010  |
| C | 9.09930  | -4.88820  | 0.06040  |
| N | 9.42170  | -6.13550  | -0.60680 |
| C | 8.55490  | -7.27270  | -0.34500 |
| C | 8.91090  | -8.16580  | 0.84200  |
| O | 7.95560  | -9.08880  | 1.04620  |
| C | 8.19900  | -10.04940 | 2.09730  |
| O | 9.93570  | -8.09870  | 1.49470  |
| O | 8.85290  | -3.90170  | -0.59410 |
| H | 10.60170 | -6.17070  | 2.14960  |
| H | 10.63870 | -4.73150  | 2.96300  |
| H | 8.83780  | -3.84220  | 1.88760  |
| H | 8.32840  | -5.53770  | 1.97820  |
| H | 10.40380 | -6.36510  | -0.46730 |
| H | 8.55210  | -7.92910  | -1.22610 |
| H | 7.51880  | -6.93660  | -0.23580 |
| H | 7.32790  | -10.70330 | 2.09610  |
| H | 9.10950  | -10.61520 | 1.88860  |
| H | 8.29960  | -9.54060  | 3.05850  |

## 62. N0010\_Syn60GP

|   |          |           |          |
|---|----------|-----------|----------|
| N | 10.51630 | -5.09750  | 2.02890  |
| C | 9.13590  | -4.85360  | 1.58930  |
| C | 9.09980  | -4.89040  | 0.05850  |
| N | 9.42130  | -6.13390  | -0.60540 |
| C | 8.60870  | -7.30970  | -0.28590 |
| C | 9.10500  | -8.04750  | 0.96220  |
| O | 8.09540  | -8.56630  | 1.68660  |
| C | 8.46700  | -9.32410  | 2.85830  |
| O | 10.27630 | -8.15160  | 1.28300  |
| O | 8.85280  | -3.90120  | -0.59370 |
| C | 8.51550  | -8.26460  | -1.54130 |
| C | 7.70870  | -9.53240  | -1.19690 |
| C | 7.78390  | -7.49230  | -2.65630 |
| C | 9.92110  | -8.66650  | -2.02860 |
| H | 10.73760 | -6.08830  | 2.07320  |
| H | 10.68770 | -4.68300  | 2.93840  |
| H | 8.83490  | -3.84890  | 1.89220  |
| H | 8.39720  | -5.56360  | 1.99990  |
| H | 10.41740 | -6.33010  | -0.52810 |
| H | 7.58790  | -6.97290  | -0.07760 |
| H | 9.09100  | -10.17560 | 2.57750  |
| H | 9.01470  | -8.69240  | 3.56120  |
| H | 7.52700  | -9.66070  | 3.29370  |
| H | 6.72900  | -9.28720  | -0.77270 |
| H | 7.54280  | -10.11730 | -2.10780 |
| H | 8.23110  | -10.17910 | -0.48420 |
| H | 6.75120  | -7.26310  | -2.36690 |
| H | 8.29250  | -6.55180  | -2.87980 |
| H | 7.74760  | -8.09770  | -3.56880 |
| H | 10.49060 | -7.79500  | -2.36560 |
| H | 10.49690 | -9.17640  | -1.24930 |
| H | 9.83360  | -9.34910  | -2.88100 |

## 63. N0100t\_Syn60GP

|   |          |           |          |
|---|----------|-----------|----------|
| N | 10.47150 | -5.36600  | 1.97810  |
| C | 9.12640  | -4.89430  | 1.61180  |
| C | 9.09980  | -4.89010  | 0.06130  |
| N | 9.42080  | -6.13200  | -0.60660 |
| C | 8.54580  | -7.26380  | -0.30870 |
| C | 9.14490  | -8.52940  | -0.89660 |
| O | 8.19130  | -9.44670  | -1.14860 |
| C | 8.65520  | -10.72320 | -1.63690 |
| O | 10.33070 | -8.71310  | -1.07140 |
| O | 8.85330  | -3.90340  | -0.59510 |
| C | 8.61140  | -3.59590  | 2.31990  |
| C | 8.62940  | -3.84530  | 3.84470  |
| C | 7.15280  | -3.31940  | 1.89630  |
| C | 9.49030  | -2.36790  | 2.00690  |
| H | 11.15840 | -4.61980  | 1.90900  |
| H | 10.50020 | -5.72490  | 2.92630  |
| H | 8.43790  | -5.69560  | 1.91470  |
| H | 10.36920 | -6.40030  | -0.33740 |
| H | 7.55330  | -7.09960  | -0.73730 |
| H | 8.40870  | -7.47600  | 0.76760  |
| H | 9.18400  | -10.59520 | -2.58390 |
| H | 9.32420  | -11.18770 | -0.90880 |
| H | 7.75630  | -11.32300 | -1.77410 |
| H | 9.64600  | -3.98290  | 4.22900  |
| H | 8.19820  | -2.98720  | 4.37150  |
| H | 8.03840  | -4.72950  | 4.11650  |
| H | 6.51250  | -4.18970  | 2.09140  |
| H | 6.74620  | -2.48090  | 2.47310  |
| H | 7.08040  | -3.06870  | 0.83640  |
| H | 9.47690  | -2.12660  | 0.94230  |
| H | 9.12310  | -1.49700  | 2.56170  |
| H | 10.53130 | -2.52290  | 2.31680  |

## 64. N0110\_Syn60GP

|   |          |           |          |
|---|----------|-----------|----------|
| N | 10.67410 | -4.72140  | 1.79570  |
| C | 9.22380  | -4.85920  | 1.60100  |
| C | 9.10020  | -4.89190  | 0.05870  |
| N | 9.42080  | -6.13210  | -0.60500 |
| C | 8.57850  | -7.29110  | -0.27600 |
| C | 9.33730  | -8.25820  | 0.63340  |
| O | 8.53950  | -8.81590  | 1.56960  |
| C | 9.16340  | -9.78470  | 2.43860  |
| O | 10.52440 | -8.50080  | 0.53800  |
| O | 8.85280  | -3.90150  | -0.59420 |
| C | 8.29050  | -3.85910  | 2.36150  |
| C | 8.64350  | -2.38260  | 2.09260  |
| C | 6.82940  | -4.12770  | 1.94600  |
| C | 8.43280  | -4.13780  | 3.87360  |
| C | 8.04770  | -7.99190  | -1.58640 |
| C | 7.18530  | -9.21670  | -1.22330 |
| C | 7.17620  | -6.96330  | -2.33310 |
| C | 9.21700  | -8.42380  | -2.48970 |
| H | 10.96940 | -5.01030  | 2.72190  |
| H | 10.98420 | -3.76770  | 1.63650  |
| H | 8.96490  | -5.85970  | 1.96700  |
| H | 10.40690 | -6.35340  | -0.46900 |
| H | 7.69170  | -6.95350  | 0.27280  |
| H | 8.38010  | -10.10290 | 3.12590  |
| H | 9.53460  | -10.63180 | 1.85680  |
| H | 9.99570  | -9.32970  | 2.98040  |
| H | 7.96750  | -1.73230  | 2.65930  |
| H | 9.66180  | -2.14370  | 2.42180  |
| H | 8.55570  | -2.13520  | 1.03310  |
| H | 6.14420  | -3.51870  | 2.54580  |
| H | 6.65900  | -3.88290  | 0.89390  |
| H | 6.55630  | -5.17870  | 2.10590  |
| H | 7.76630  | -3.48340  | 4.44580  |
| H | 8.17080  | -5.17460  | 4.11900  |
| H | 9.45280  | -3.95090  | 4.22840  |
| H | 6.72500  | -9.62470  | -2.12960 |
| H | 7.77370  | -10.01870 | -0.76520 |
| H | 6.37950  | -8.95390  | -0.52840 |
| H | 6.81600  | -7.39030  | -3.27560 |
| H | 6.29810  | -6.67990  | -1.73940 |
| H | 7.74550  | -6.05780  | -2.55740 |
| H | 9.82510  | -7.56170  | -2.77770 |
| H | 9.86830  | -9.15360  | -1.99810 |
| H | 8.82680  | -8.88290  | -3.40490 |

## 65. N011'0\_Syn60GP

|   |          |           |          |
|---|----------|-----------|----------|
| N | 10.63750 | -5.21960  | 1.86760  |
| C | 9.22950  | -4.86480  | 1.60730  |
| C | 9.09910  | -4.88770  | 0.06450  |
| N | 9.42130  | -6.13410  | -0.60870 |
| C | 8.70230  | -7.37050  | -0.22520 |
| C | 7.27510  | -7.21440  | -0.77410 |
| O | 6.60840  | -6.30620  | -0.02230 |
| C | 5.29090  | -5.94350  | -0.48490 |
| O | 6.77910  | -7.76690  | -1.73110 |
| O | 8.85340  | -3.90380  | -0.59620 |
| C | 8.68450  | -3.59100  | 2.33710  |
| C | 8.79620  | -3.83250  | 3.85920  |
| C | 7.19440  | -3.39060  | 1.98990  |
| C | 9.47690  | -2.31690  | 1.97840  |
| C | 9.45630  | -8.64710  | -0.71560 |
| C | 8.62000  | -9.89050  | -0.34260 |
| C | 10.80370 | -8.74160  | 0.03740  |
| C | 9.72510  | -8.63090  | -2.23430 |
| H | 10.76400 | -5.57900  | 2.80800  |
| H | 11.24470 | -4.41080  | 1.76420  |
| H | 8.63150  | -5.70790  | 1.97320  |
| H | 10.41370 | -6.28500  | -0.43500 |
| H | 4.92870  | -5.20070  | 0.22470  |
| H | 5.34960  | -5.52090  | -1.49010 |
| H | 4.63980  | -6.82040  | -0.49610 |
| H | 8.35960  | -2.99070  | 4.40770  |
| H | 8.25890  | -4.73950  | 4.16390  |
| H | 9.83740  | -3.92610  | 4.18750  |
| H | 6.77920  | -2.56780  | 2.58280  |
| H | 7.05810  | -3.15170  | 0.93330  |
| H | 6.61270  | -4.29160  | 2.21860  |
| H | 9.40920  | -2.08990  | 0.91270  |
| H | 9.07840  | -1.46350  | 2.53890  |
| H | 10.53620 | -2.40330  | 2.25090  |
| H | 9.17670  | -10.79990 | -0.59350 |
| H | 8.40780  | -9.92160  | 0.73380  |
| H | 7.67230  | -9.91680  | -0.88480 |
| H | 11.29900 | -9.68490  | -0.21560 |
| H | 11.50040 | -7.93880  | -0.22820 |
| H | 10.66350 | -8.71640  | 1.12430  |
| H | 10.29750 | -9.52310  | -2.51400 |
| H | 8.79230  | -8.62640  | -2.80100 |
| H | 10.30330 | -7.75030  | -2.52860 |
| H | 8.60200  | -7.47220  | 0.86840  |

## 66. N1010\_Syn60GP

|   |          |           |          |
|---|----------|-----------|----------|
| N | 10.53400 | -5.05010  | 2.00810  |
| C | 9.14260  | -4.84720  | 1.58920  |
| C | 9.09980  | -4.89030  | 0.05950  |
| N | 9.42120  | -6.13360  | -0.60580 |
| C | 8.60710  | -7.30820  | -0.28740 |
| C | 9.11650  | -8.05400  | 0.95080  |
| O | 8.11650  | -8.59410  | 1.67280  |
| C | 8.50150  | -9.35850  | 2.83560  |
| O | 10.29000 | -8.14660  | 1.26610  |
| O | 8.85290  | -3.90170  | -0.59420 |
| C | 8.49670  | -8.25350  | -1.54880 |
| C | 7.76070  | -7.46780  | -2.65170 |
| C | 9.89580  | -8.65960  | -2.05090 |
| C | 7.68460  | -9.51910  | -1.20850 |
| C | 10.94820 | -4.49340  | 3.31980  |
| C | 12.37840 | -5.00430  | 3.56320  |
| C | 10.96890 | -2.95630  | 3.24190  |
| C | 10.03200 | -4.95340  | 4.47640  |
| H | 10.76100 | -6.04140  | 1.97660  |
| H | 8.80610  | -3.85300  | 1.88340  |
| H | 8.43280  | -5.57870  | 2.01570  |
| H | 10.41660 | -6.33110  | -0.52480 |
| H | 7.58970  | -6.97010  | -0.06440 |
| H | 9.13720  | -10.19770 | 2.54440  |
| H | 9.04100  | -8.72590  | 3.54390  |
| H | 7.56720  | -9.71300  | 3.26910  |
| H | 7.71330  | -8.06570  | -3.56870 |
| H | 6.73170  | -7.23510  | -2.35200 |
| H | 8.27290  | -6.52840  | -2.87150 |
| H | 9.79790  | -9.33420  | -2.90850 |
| H | 10.46800 | -7.78830  | -2.38390 |
| H | 10.47470 | -9.18000  | -1.28070 |
| H | 8.20890  | -10.17610 | -0.50680 |
| H | 6.71080  | -9.27120  | -0.77220 |
| H | 7.50570  | -10.09400 | -2.12340 |
| H | 12.77280 | -4.61450  | 4.50710  |
| H | 12.40270 | -6.09950  | 3.61620  |
| H | 13.04000 | -4.68740  | 2.75140  |
| H | 11.36670 | -2.53510  | 4.17140  |
| H | 11.59940 | -2.62790  | 2.41040  |
| H | 9.96930  | -2.53420  | 3.09630  |
| H | 10.02010 | -6.04740  | 4.55200  |
| H | 10.38140 | -4.55530  | 5.43550  |
| H | 9.00100  | -4.61050  | 4.33540  |

## 67. N1100\_Syn60GP

|   |          |           |          |
|---|----------|-----------|----------|
| N | 10.20160 | -3.76180  | 1.97110  |
| C | 9.18790  | -4.76750  | 1.61770  |
| C | 9.09880  | -4.88680  | 0.07260  |
| N | 9.42060  | -6.13100  | -0.61260 |
| C | 8.59500  | -7.30850  | -0.39660 |
| C | 9.02740  | -8.22310  | 0.74710  |
| O | 8.12400  | -9.19890  | 0.95260  |
| C | 8.45680  | -10.18390 | 1.95520  |
| O | 10.07010 | -8.12270  | 1.36390  |
| O | 8.85440  | -3.90770  | -0.60050 |
| C | 7.80450  | -4.41260  | 2.29380  |
| C | 7.36570  | -2.96800  | 1.98470  |
| C | 7.97840  | -4.56660  | 3.81760  |
| C | 6.70300  | -5.38230  | 1.82380  |
| C | 11.61390 | -4.13650  | 2.22770  |
| C | 12.27110 | -4.94610  | 1.08580  |
| C | 12.36770 | -2.80530  | 2.39950  |
| C | 11.70320 | -4.94060  | 3.53750  |
| H | 10.15860 | -2.99630  | 1.30410  |
| H | 9.50500  | -5.73260  | 2.01870  |
| H | 10.39940 | -6.35610  | -0.44800 |
| H | 8.61760  | -7.92730  | -1.30460 |
| H | 7.54860  | -7.02880  | -0.26110 |
| H | 9.38240  | -10.69810 | 1.68730  |
| H | 8.57650  | -9.70660  | 2.93030  |
| H | 7.61770  | -10.87840 | 1.96580  |
| H | 6.41820  | -2.75600  | 2.49380  |
| H | 8.10540  | -2.24860  | 2.34810  |
| H | 7.22220  | -2.80450  | 0.91360  |
| H | 7.04760  | -4.30420  | 4.33340  |
| H | 8.23300  | -5.59800  | 4.09120  |
| H | 8.77110  | -3.90950  | 4.18380  |
| H | 6.96660  | -6.42810  | 2.02200  |
| H | 5.77090  | -5.17800  | 2.36220  |
| H | 6.48500  | -5.26970  | 0.75550  |
| H | 13.34330 | -5.07710  | 1.27070  |
| H | 11.83650 | -5.94840  | 1.01410  |
| H | 12.15990 | -4.43190  | 0.12380  |
| H | 13.41690 | -2.98590  | 2.65390  |
| H | 12.34560 | -2.21760  | 1.47340  |
| H | 11.91420 | -2.20700  | 3.19580  |
| H | 11.28870 | -4.36500  | 4.37050  |
| H | 11.16230 | -5.88960  | 3.47000  |
| H | 12.74820 | -5.17750  | 3.76510  |

## 68. N1110\_Syn60GP

|   |          |           |          |
|---|----------|-----------|----------|
| N | 8.31410  | -5.83430  | 2.25100  |
| C | 9.07190  | -4.75400  | 1.61750  |
| C | 9.10020  | -4.89190  | 0.06860  |
| N | 9.41930  | -6.12630  | -0.60940 |
| C | 8.55750  | -7.31180  | -0.48110 |
| C | 9.27620  | -8.38680  | 0.32950  |
| O | 8.42580  | -9.22110  | 0.95590  |
| C | 9.02490  | -10.30210 | 1.69810  |
| O | 10.48730 | -8.50050  | 0.39500  |
| O | 8.85430  | -3.90730  | -0.59970 |
| C | 10.52030 | -4.54550  | 2.22150  |
| C | 11.30480 | -3.53900  | 1.35280  |
| C | 11.33610 | -5.85030  | 2.33110  |
| C | 10.37470 | -3.94100  | 3.63540  |
| C | 8.11750  | -7.82540  | -1.91170 |
| C | 7.34380  | -6.67670  | -2.58860 |
| C | 9.34700  | -8.18470  | -2.76550 |
| C | 7.18630  | -9.04850  | -1.79690 |
| C | 6.92480  | -5.57360  | 2.72190  |
| C | 6.04340  | -5.11500  | 1.54620  |
| C | 6.40000  | -6.91570  | 3.26140  |
| C | 6.85310  | -4.51630  | 3.84810  |
| H | 8.84240  | -6.25940  | 3.00500  |
| H | 8.56890  | -3.79110  | 1.76470  |
| H | 10.38510 | -6.39600  | -0.42980 |
| H | 7.65150  | -7.05410  | 0.06620  |
| H | 8.19000  | -10.85700 | 2.12510  |
| H | 9.61410  | -10.94010 | 1.03490  |
| H | 9.67240  | -9.90980  | 2.48580  |
| H | 12.25460 | -3.29330  | 1.84000  |
| H | 11.53920 | -3.93840  | 0.36080  |
| H | 10.74500 | -2.60940  | 1.20820  |
| H | 12.31720 | -5.62560  | 2.76470  |
| H | 10.86410 | -6.59200  | 2.98470  |
| H | 11.50620 | -6.33510  | 1.36750  |
| H | 9.82370  | -4.59910  | 4.31440  |
| H | 11.36510 | -3.77500  | 4.07320  |
| H | 9.85590  | -2.97680  | 3.60620  |
| H | 7.04920  | -6.97030  | -3.60250 |
| H | 6.42830  | -6.43400  | -2.03470 |
| H | 7.95450  | -5.77290  | -2.65060 |
| H | 9.02800  | -8.49480  | -3.76680 |
| H | 10.01000 | -7.32170  | -2.87580 |
| H | 9.92450  | -9.00740  | -2.32960 |
| H | 7.70160  | -9.93390  | -1.41320 |
| H | 6.33410  | -8.84760  | -1.13750 |
| H | 6.78960  | -9.29930  | -2.78690 |
| H | 5.01840  | -4.94940  | 1.89350  |



|   |         |          |         |
|---|---------|----------|---------|
| H | 6.39700 | -4.17800 | 1.10530 |
| H | 6.00790 | -5.87040 | 0.75570 |
| H | 5.36860 | -6.81450 | 3.61490 |
| H | 6.43310 | -7.68520 | 2.48500 |
| H | 7.00660 | -7.26150 | 4.10820 |
| H | 7.23580 | -3.54450 | 3.52080 |
| H | 5.81660 | -4.36840 | 4.17150 |
| H | 7.43280 | -4.83330 | 4.72200 |

## 69. N111'0\_Syn60GP

|   |          |           |          |
|---|----------|-----------|----------|
| N | 10.20690 | -3.76010  | 1.95690  |
| C | 9.18870  | -4.76960  | 1.61690  |
| C | 9.09910  | -4.88780  | 0.06820  |
| N | 9.42110  | -6.13310  | -0.61040 |
| C | 8.53160  | -7.31090  | -0.46180 |
| C | 7.59970  | -7.24340  | -1.68600 |
| O | 6.58680  | -6.38450  | -1.44080 |
| C | 5.72380  | -6.08370  | -2.55630 |
| O | 7.74030  | -7.81770  | -2.74510 |
| O | 8.85370  | -3.90460  | -0.59840 |
| C | 7.82220  | -4.40310  | 2.32290  |
| C | 6.72290  | -5.41880  | 1.96240  |
| C | 7.34260  | -2.98800  | 1.94400  |
| C | 8.05540  | -4.45900  | 3.84650  |
| C | 9.30400  | -8.65910  | -0.31720 |
| C | 8.28150  | -9.81640  | -0.35420 |
| C | 10.35860 | -8.86960  | -1.42350 |
| C | 9.99850  | -8.68500  | 1.06260  |
| C | 11.62810 | -4.10820  | 2.18640  |
| C | 11.75410 | -4.96900  | 3.45600  |
| C | 12.30490 | -4.83280  | 0.99950  |
| C | 12.34560 | -2.76510  | 2.41900  |
| H | 10.14000 | -2.99160  | 1.29520  |
| H | 9.50460  | -5.73590  | 2.02170  |
| H | 10.37510 | -6.38820  | -0.37300 |
| H | 6.30190  | -5.62910  | -3.36390 |
| H | 5.24180  | -6.99380  | -2.92060 |
| H | 4.98520  | -5.38200  | -2.16970 |
| H | 5.80150  | -5.17130  | 2.50120  |
| H | 6.48690  | -5.42130  | 0.89440  |
| H | 7.00280  | -6.43720  | 2.25960  |
| H | 6.42010  | -2.75870  | 2.48970  |
| H | 8.08430  | -2.23210  | 2.21900  |
| H | 7.13860  | -2.89720  | 0.87450  |
| H | 8.82870  | -3.74970  | 4.14980  |
| H | 7.12900  | -4.20900  | 4.37600  |
| H | 8.36130  | -5.46190  | 4.16970  |
| H | 8.78400  | -10.76380 | -0.13200 |
| H | 7.49380  | -9.67710  | 0.39670  |
| H | 7.81230  | -9.90730  | -1.33630 |
| H | 10.85410 | -9.83600  | -1.27600 |
| H | 9.90000  | -8.85880  | -2.41340 |
| H | 11.13980 | -8.10140  | -1.40530 |
| H | 10.75410 | -7.89920  | 1.17120  |
| H | 9.27540  | -8.57330  | 1.87900  |
| H | 10.51260 | -9.64170  | 1.20220  |
| H | 12.80760 | -5.18270  | 3.66580  |
| H | 11.32730 | -4.44760  | 4.31750  |

|   |          |          |         |
|---|----------|----------|---------|
| H | 11.24110 | -5.93100 | 3.35320 |
| H | 13.38290 | -4.93530 | 1.16670 |
| H | 11.90980 | -5.84680 | 0.87460 |
| H | 12.16000 | -4.28180 | 0.06370 |
| H | 11.88280 | -2.22330 | 3.24920 |
| H | 13.40300 | -2.92560 | 2.65260 |
| H | 12.29400 | -2.13160 | 1.52510 |
| H | 7.89700  | -7.21420 | 0.42630 |

70. N0000\_Syn-60GP

|   |          |          |          |
|---|----------|----------|----------|
| N | 7.99640  | -5.79040 | 2.03820  |
| C | 9.04980  | -4.87310 | 1.58940  |
| C | 9.09940  | -4.88850 | 0.06020  |
| N | 9.42160  | -6.13530 | -0.60660 |
| C | 10.71680 | -6.72970 | -0.32360 |
| C | 10.80170 | -7.69550 | 0.85710  |
| O | 12.07510 | -8.06200 | 1.08110  |
| C | 12.29380 | -9.03180 | 2.12930  |
| O | 9.85450  | -8.12370 | 1.48990  |
| O | 8.85290  | -3.90170 | -0.59410 |
| H | 7.61810  | -5.49840 | 2.93260  |
| H | 8.34530  | -6.74150 | 2.12030  |
| H | 10.05020 | -5.10540 | 1.99570  |
| H | 8.79990  | -3.85320 | 1.88800  |
| H | 8.65980  | -6.80190 | -0.50020 |
| H | 11.46800 | -5.94450 | -0.19130 |
| H | 11.04860 | -7.29850 | -1.20310 |
| H | 13.36990 | -9.19880 | 2.14610  |
| H | 11.94850 | -8.63700 | 3.08730  |
| H | 11.76050 | -9.95800 | 1.90460  |

71. N0010\_Syn-60GP

|   |          |           |          |
|---|----------|-----------|----------|
| N | 8.24970  | -6.02020  | 2.08900  |
| C | 9.01140  | -4.87030  | 1.58800  |
| C | 9.09980  | -4.89010  | 0.05550  |
| N | 9.42230  | -6.13790  | -0.60410 |
| C | 10.66670 | -6.82900  | -0.18340 |
| C | 11.82920 | -5.96220  | -0.69340 |
| O | 11.92810 | -4.85220  | 0.07790  |
| C | 12.88140 | -3.85890  | -0.35470 |
| O | 12.55810 | -6.17330  | -1.63720 |
| O | 8.85180  | -3.89750  | -0.59190 |
| C | 10.69100 | -8.31100  | -0.67440 |
| C | 12.02840 | -8.95060  | -0.24220 |
| C | 9.54860  | -9.08050  | 0.02890  |
| C | 10.51670 | -8.43500  | -2.20170 |
| H | 7.24950  | -5.84850  | 2.03150  |
| H | 8.46470  | -6.20890  | 3.06300  |
| H | 10.03370 | -4.93110  | 1.97580  |
| H | 8.60830  | -3.89020  | 1.87180  |
| H | 8.64580  | -6.76920  | -0.41160 |
| H | 10.76060 | -6.86270  | 0.91400  |
| H | 13.88910 | -4.28010  | -0.36230 |
| H | 12.62540 | -3.50590  | -1.35590 |
| H | 12.80500 | -3.04890  | 0.36990  |
| H | 12.17510 | -8.87600  | 0.84290  |
| H | 12.03120 | -10.01480 | -0.50150 |
| H | 12.87960 | -8.48210  | -0.74140 |
| H | 9.58800  | -8.96310  | 1.11740  |
| H | 8.55420  | -8.76420  | -0.30640 |
| H | 9.63070  | -10.14800 | -0.20160 |
| H | 9.58820  | -7.96290  | -2.53590 |
| H | 11.34470 | -7.96520  | -2.73520 |
| H | 10.47960 | -9.49470  | -2.48020 |

72. N0100\_Syn-60GP

|   |          |           |          |
|---|----------|-----------|----------|
| N | 9.36300  | -6.13710  | 2.20080  |
| C | 8.96580  | -4.85250  | 1.60960  |
| C | 9.10000  | -4.89110  | 0.06340  |
| N | 9.41990  | -6.12850  | -0.60730 |
| C | 10.75500 | -6.68650  | -0.40510 |
| C | 10.67730 | -8.16320  | -0.06320 |
| O | 11.88990 | -8.73520  | -0.07460 |
| C | 11.93980 | -10.13830 | 0.26210  |
| O | 9.64520  | -8.75780  | 0.18980  |
| O | 8.85400  | -3.90590  | -0.59660 |
| C | 9.73920  | -3.65820  | 2.29180  |
| C | 9.62820  | -3.80760  | 3.82680  |
| C | 9.10250  | -2.30640  | 1.90870  |
| C | 11.22830 | -3.66560  | 1.89680  |
| H | 9.11470  | -6.16620  | 3.18410  |
| H | 8.88890  | -6.91940  | 1.75730  |
| H | 7.89150  | -4.63760  | 1.76240  |
| H | 8.71490  | -6.84490  | -0.43590 |
| H | 11.29130 | -6.20500  | 0.42090  |
| H | 11.36820 | -6.57130  | -1.30750 |
| H | 11.57470 | -10.29530 | 1.27950  |
| H | 11.33130 | -10.71680 | -0.43610 |
| H | 12.99000 | -10.41540 | 0.18210  |
| H | 10.18740 | -4.66980  | 4.20360  |
| H | 10.04320 | -2.91840  | 4.31330  |
| H | 8.58270  | -3.89650  | 4.14870  |
| H | 8.04290  | -2.27570  | 2.19040  |
| H | 9.61240  | -1.49750  | 2.44450  |
| H | 9.16750  | -2.11110  | 0.83820  |
| H | 11.36050 | -3.47460  | 0.82630  |
| H | 11.76670 | -2.87870  | 2.43670  |
| H | 11.69690 | -4.62310  | 2.14590  |

## 73. N0110\_Syn-60GP

|   |          |           |          |
|---|----------|-----------|----------|
| N | 9.95040  | -3.69450  | 1.96300  |
| C | 9.09690  | -4.82360  | 1.59950  |
| C | 9.09970  | -4.89000  | 0.05850  |
| N | 9.42170  | -6.13570  | -0.60550 |
| C | 10.76710 | -6.67390  | -0.32390 |
| C | 11.78540 | -5.90090  | -1.17960 |
| O | 12.77180 | -5.40210  | -0.40110 |
| C | 13.79420 | -4.65200  | -1.08460 |
| O | 11.74620 | -5.75860  | -2.38170 |
| O | 8.85240  | -3.89980  | -0.59360 |
| C | 7.62440  | -4.82380  | 2.18000  |
| C | 6.87330  | -3.52070  | 1.85190  |
| C | 6.84010  | -6.02340  | 1.60890  |
| C | 7.71730  | -4.98860  | 3.71120  |
| C | 10.84050 | -8.21790  | -0.59540 |
| C | 12.30630 | -8.67730  | -0.44530 |
| C | 9.99890  | -8.95140  | 0.47230  |
| C | 10.32750 | -8.58430  | -2.00170 |
| H | 9.94330  | -3.51950  | 2.96280  |
| H | 9.65000  | -2.85300  | 1.47870  |
| H | 9.57180  | -5.73290  | 1.98750  |
| H | 8.72770  | -6.82640  | -0.32640 |
| H | 11.06670 | -6.52110  | 0.72270  |
| H | 14.47230 | -4.30900  | -0.30380 |
| H | 14.31920 | -5.28810  | -1.80190 |
| H | 13.35110 | -3.80480  | -1.61300 |
| H | 5.86240  | -3.55830  | 2.27390  |
| H | 7.37510  | -2.64840  | 2.28390  |
| H | 6.78800  | -3.35870  | 0.77420  |
| H | 5.85680  | -6.09790  | 2.08630  |
| H | 6.66350  | -5.92200  | 0.53140  |
| H | 7.36160  | -6.97120  | 1.79180  |
| H | 6.71510  | -5.01330  | 4.15320  |
| H | 8.22650  | -5.92060  | 3.98500  |
| H | 8.25430  | -4.15770  | 4.18270  |
| H | 12.36430 | -9.76760  | -0.52890 |
| H | 12.94570 | -8.25480  | -1.22680 |
| H | 12.72270 | -8.39110  | 0.52710  |
| H | 10.08600 | -10.03430 | 0.33440  |
| H | 10.34130 | -8.71460  | 1.48650  |
| H | 8.93040  | -8.71420  | 0.41000  |
| H | 9.27490  | -8.31750  | -2.13430 |
| H | 10.89410 | -8.06700  | -2.77900 |
| H | 10.42420 | -9.66510  | -2.15630 |

74. N011'0\_Syn-60GP

|   |          |           |          |
|---|----------|-----------|----------|
| N | 8.30410  | -5.99220  | 2.10170  |
| C | 8.96840  | -4.78370  | 1.61200  |
| C | 9.09980  | -4.89070  | 0.06910  |
| N | 9.41930  | -6.12630  | -0.60990 |
| C | 10.70370 | -6.80180  | -0.40780 |
| C | 10.52000 | -8.08950  | 0.39540  |
| O | 11.63800 | -8.45100  | 1.05410  |
| C | 11.57370 | -9.69030  | 1.79200  |
| O | 9.48330  | -8.72450  | 0.44490  |
| O | 8.85470  | -3.90860  | -0.59970 |
| C | 10.22070 | -4.24580  | 2.42790  |
| C | 9.65580  | -3.51960  | 3.67080  |
| C | 11.01970 | -3.22890  | 1.59030  |
| C | 11.15650 | -5.36350  | 2.92440  |
| C | 11.40520 | -7.06070  | -1.80730 |
| C | 12.78410 | -7.72470  | -1.62580 |
| C | 11.60230 | -5.68570  | -2.47540 |
| C | 10.51310 | -7.94130  | -2.70020 |
| H | 7.91400  | -5.85740  | 3.02870  |
| H | 8.90200  | -6.81160  | 2.12150  |
| H | 8.22640  | -3.98440  | 1.69920  |
| H | 8.65160  | -6.78730  | -0.49180 |
| H | 12.55870 | -9.80810  | 2.24260  |
| H | 10.79960 | -9.63580  | 2.56130  |
| H | 11.35300 | -10.52170 | 1.11840  |
| H | 10.46930 | -3.15460  | 4.30750  |
| H | 9.04250  | -2.65830  | 3.38320  |
| H | 9.03740  | -4.18630  | 4.28400  |
| H | 11.79280 | -2.75790  | 2.20780  |
| H | 11.52120 | -3.70170  | 0.73860  |
| H | 10.37390 | -2.44070  | 1.19150  |
| H | 11.63320 | -5.92190  | 2.11560  |
| H | 11.95970 | -4.92540  | 3.52750  |
| H | 10.62870 | -6.08060  | 3.56280  |
| H | 13.29880 | -7.76210  | -2.59210 |
| H | 13.41780 | -7.16000  | -0.93260 |
| H | 12.71170 | -8.74930  | -1.25070 |
| H | 12.04720 | -5.81440  | -3.46830 |
| H | 10.65110 | -5.15990  | -2.58430 |
| H | 12.28010 | -5.05270  | -1.88900 |
| H | 10.98640 | -8.07810  | -3.67880 |
| H | 10.34990 | -8.93470  | -2.26800 |
| H | 9.53790  | -7.47320  | -2.86090 |
| H | 11.38490 | -6.15440  | 0.15140  |



75. N1000\_Syn-60GP

|   |          |           |          |
|---|----------|-----------|----------|
| N | 8.61480  | -6.06730  | 2.20200  |
| C | 9.09230  | -4.83060  | 1.59040  |
| C | 9.10050  | -4.89300  | 0.05300  |
| N | 9.42140  | -6.13470  | -0.60220 |
| C | 10.73020 | -6.68410  | -0.24780 |
| C | 10.79570 | -8.13940  | -0.66980 |
| O | 12.07040 | -8.55100  | -0.80310 |
| C | 12.25570 | -9.94370  | -1.13160 |
| O | 9.82800  | -8.85500  | -0.82490 |
| O | 8.85190  | -3.89790  | -0.59130 |
| C | 8.80820  | -6.23870  | 3.66730  |
| C | 8.05330  | -7.52310  | 4.04750  |
| C | 8.25350  | -5.05230  | 4.48690  |
| C | 10.30610 | -6.42760  | 3.96480  |
| H | 7.62180  | -6.17210  | 2.00240  |
| H | 10.13040 | -4.65710  | 1.90140  |
| H | 8.53100  | -3.92490  | 1.85850  |
| H | 8.72120  | -6.83990  | -0.36610 |
| H | 10.94140 | -6.67810  | 0.83490  |
| H | 11.52460 | -6.12360  | -0.74880 |
| H | 11.82810 | -10.57780 | -0.35130 |
| H | 11.77810 | -10.17320 | -2.08650 |
| H | 13.33410 | -10.08350 | -1.19520 |
| H | 6.97830  | -7.42010  | 3.85410  |
| H | 8.42420  | -8.37340  | 3.46720  |
| H | 8.17740  | -7.74490  | 5.11220  |
| H | 8.35360  | -5.24090  | 5.56140  |
| H | 8.78600  | -4.12140  | 4.26570  |
| H | 7.19010  | -4.89310  | 4.27240  |
| H | 10.45680 | -6.62790  | 5.03050  |
| H | 10.70670 | -7.27270  | 3.39630  |
| H | 10.89340 | -5.53590  | 3.72050  |

## 76. N1010\_Syn-60GP

|   |          |           |          |
|---|----------|-----------|----------|
| N | 7.66790  | -5.62470  | 1.85110  |
| C | 8.91470  | -4.89740  | 1.57750  |
| C | 9.09970  | -4.88980  | 0.05760  |
| N | 9.42210  | -6.13730  | -0.60510 |
| C | 10.64480 | -6.86110  | -0.19000 |
| C | 11.83140 | -5.97980  | -0.61090 |
| O | 11.85240 | -4.86880  | 0.16260  |
| C | 12.82040 | -3.85960  | -0.19420 |
| O | 12.63800 | -6.18540  | -1.49050 |
| O | 8.85210  | -3.89850  | -0.59300 |
| C | 10.66980 | -8.31320  | -0.76350 |
| C | 9.48860  | -9.10210  | -0.15220 |
| C | 10.55450 | -8.34430  | -2.30110 |
| C | 11.97790 | -9.00190  | -0.31700 |
| C | 7.38760  | -6.01790  | 3.25820  |
| C | 5.95020  | -6.56430  | 3.26790  |
| C | 8.35600  | -7.13800  | 3.67600  |
| C | 7.49660  | -4.83080  | 4.23980  |
| H | 6.88950  | -5.06020  | 1.51510  |
| H | 9.74750  | -5.41990  | 2.05350  |
| H | 8.92060  | -3.85470  | 1.92250  |
| H | 8.61760  | -6.74660  | -0.46510 |
| H | 10.71600 | -6.95830  | 0.90740  |
| H | 13.83250 | -4.26420  | -0.12090 |
| H | 12.63880 | -3.51140  | -1.21330 |
| H | 12.67250 | -3.05080  | 0.52060  |
| H | 9.55700  | -10.15400 | -0.44910 |
| H | 9.49870  | -9.06320  | 0.94340  |
| H | 8.51200  | -8.74330  | -0.49680 |
| H | 10.51550 | -9.38470  | -2.64440 |
| H | 9.64640  | -7.83860  | -2.64180 |
| H | 11.41010 | -7.85730  | -2.77230 |
| H | 12.85570 | -8.52200  | -0.75470 |
| H | 12.08250 | -8.99150  | 0.77550  |
| H | 11.97240 | -10.04970 | -0.63630 |
| H | 5.67440  | -6.91130  | 4.26870  |
| H | 5.23140  | -5.78890  | 2.97580  |
| H | 5.85240  | -7.40140  | 2.56980  |
| H | 8.11390  | -7.49190  | 4.68350  |
| H | 8.28230  | -7.98330  | 2.98520  |
| H | 9.39680  | -6.79770  | 3.69530  |
| H | 6.82190  | -4.01790  | 3.94670  |
| H | 7.22810  | -5.13980  | 5.25590  |
| H | 8.51450  | -4.42880  | 4.27660  |

77. N1100\_Syn-60GP

|   |          |          |          |
|---|----------|----------|----------|
| N | 9.44320  | -3.50880 | 2.12250  |
| C | 9.01420  | -4.81080 | 1.61050  |
| C | 9.09920  | -4.88820 | 0.06980  |
| N | 9.42060  | -6.13120 | -0.61100 |
| C | 10.71050 | -6.75600 | -0.37190 |
| C | 10.80710 | -7.73640 | 0.79520  |
| O | 12.09310 | -8.04420 | 1.05250  |
| C | 12.32260 | -9.04330 | 2.06980  |
| O | 9.86310  | -8.22430 | 1.38370  |
| O | 8.85400  | -3.90610 | -0.59930 |
| C | 7.52100  | -5.10790 | 2.08700  |
| C | 6.60030  | -3.91410 | 1.76940  |
| C | 7.56220  | -5.32650 | 3.61150  |
| C | 6.94010  | -6.37480 | 1.42550  |
| C | 10.83860 | -3.27910 | 2.56540  |
| C | 11.90270 | -3.61720 | 1.49670  |
| C | 10.92490 | -1.77780 | 2.89630  |
| C | 11.11630 | -4.08900 | 3.84460  |
| H | 9.18430  | -2.80060 | 1.44020  |
| H | 9.63440  | -5.60060 | 2.04070  |
| H | 8.66420  | -6.80260 | -0.50780 |
| H | 11.48710 | -5.99480 | -0.27320 |
| H | 10.98580 | -7.33390 | -1.26560 |
| H | 11.92500 | -8.70540 | 3.02930  |
| H | 11.84370 | -9.98440 | 1.79070  |
| H | 13.40440 | -9.15970 | 2.12050  |
| H | 5.57940  | -4.14450 | 2.09470  |
| H | 6.92510  | -3.01340 | 2.29680  |
| H | 6.56790  | -3.69470 | 0.69730  |
| H | 6.54700  | -5.47050 | 3.99860  |
| H | 8.14730  | -6.21710 | 3.87040  |
| H | 8.00160  | -4.46130 | 4.11400  |
| H | 7.59450  | -7.24190 | 1.55420  |
| H | 5.97380  | -6.61240 | 1.88390  |
| H | 6.74480  | -6.22720 | 0.35560  |
| H | 12.90170 | -3.31580 | 1.83150  |
| H | 11.94440 | -4.69360 | 1.30340  |
| H | 11.69120 | -3.10200 | 0.55350  |
| H | 11.91580 | -1.52200 | 3.28520  |
| H | 10.74960 | -1.16800 | 2.00180  |
| H | 10.17490 | -1.50820 | 3.64600  |
| H | 10.40530 | -3.82000 | 4.63110  |
| H | 11.03860 | -5.16800 | 3.67290  |
| H | 12.12980 | -3.88820 | 4.20880  |

## 78. N1110\_Syn-60GP

|   |          |           |          |
|---|----------|-----------|----------|
| N | 8.46580  | -6.06920  | 2.18730  |
| C | 8.90420  | -4.79230  | 1.61840  |
| C | 9.09960  | -4.88970  | 0.06800  |
| N | 9.42010  | -6.12910  | -0.60970 |
| C | 10.63740 | -6.86840  | -0.26210 |
| C | 11.84380 | -6.14940  | -0.88850 |
| O | 12.88020 | -6.09000  | -0.01120 |
| C | 14.09050 | -5.48880  | -0.51090 |
| O | 11.91100 | -5.70720  | -2.01260 |
| O | 8.85420  | -3.90670  | -0.59880 |
| C | 10.07570 | -4.09470  | 2.42780  |
| C | 11.22630 | -5.04540  | 2.81760  |
| C | 9.46870  | -3.52100  | 3.72900  |
| C | 10.66010 | -2.91880  | 1.61870  |
| C | 10.56150 | -8.35440  | -0.78570 |
| C | 9.47680  | -9.11130  | 0.01070  |
| C | 10.23460 | -8.41960  | -2.29050 |
| C | 11.91260 | -9.05310  | -0.52340 |
| C | 7.01490  | -6.30620  | 2.42400  |
| C | 6.24710  | -6.24770  | 1.09100  |
| C | 6.90330  | -7.72330  | 3.01260  |
| C | 6.38170  | -5.30300  | 3.41640  |
| H | 8.97440  | -6.28420  | 3.03750  |
| H | 8.09170  | -4.05650  | 1.66850  |
| H | 8.62240  | -6.74300  | -0.46570 |
| H | 10.80840 | -6.92970  | 0.81950  |
| H | 14.79240 | -5.51240  | 0.32250  |
| H | 14.47800 | -6.06060  | -1.35780 |
| H | 13.90160 | -4.46170  | -0.83130 |
| H | 11.94160 | -4.49860  | 3.44240  |
| H | 10.89030 | -5.90450  | 3.41000  |
| H | 11.77500 | -5.42140  | 1.95340  |
| H | 10.24630 | -3.01660  | 4.31250  |
| H | 8.68370  | -2.78780  | 3.51480  |
| H | 9.03720  | -4.30100  | 4.36410  |
| H | 9.88080  | -2.22220  | 1.29670  |
| H | 11.37660 | -2.37030  | 2.24030  |
| H | 11.18680 | -3.25500  | 0.72120  |
| H | 9.46890  | -10.16490 | -0.28930 |
| H | 9.66260  | -9.06360  | 1.08870  |
| H | 8.46870  | -8.72460  | -0.17330 |
| H | 10.19560 | -9.46730  | -2.61020 |
| H | 9.27040  | -7.95680  | -2.51610 |
| H | 10.98880 | -7.90310  | -2.88910 |
| H | 12.72020 | -8.62580  | -1.12580 |
| H | 12.20600 | -8.98670  | 0.53020  |
| H | 11.83550 | -10.11350 | -0.78600 |
| H | 5.18300  | -6.44000  | 1.26170  |

|   |         |          |         |
|---|---------|----------|---------|
| H | 6.32660 | -5.26760 | 0.60990 |
| H | 6.61030 | -7.00830 | 0.39220 |
| H | 5.85720 | -7.98120 | 3.20730 |
| H | 7.32280 | -8.46330 | 2.32520 |
| H | 7.44400 | -7.79690 | 3.96440 |
| H | 6.44730 | -4.27170 | 3.05620 |
| H | 5.32030 | -5.52950 | 3.56660 |
| H | 6.87520 | -5.35370 | 4.39290 |

79. N111'0\_Syn-60GP

|   |          |          |          |
|---|----------|----------|----------|
| N | 9.40270  | -3.48830 | 2.11150  |
| C | 9.03260  | -4.81280 | 1.61110  |
| C | 9.09970  | -4.89000 | 0.06700  |
| N | 9.42050  | -6.13070 | -0.60920 |
| C | 10.74860 | -6.71900 | -0.38540 |
| C | 10.70460 | -7.80100 | 0.69420  |
| O | 11.78570 | -7.76590 | 1.49970  |
| C | 11.85990 | -8.79050 | 2.51470  |
| O | 9.80160  | -8.60610 | 0.82410  |
| O | 8.85370  | -3.90480 | -0.59830 |
| C | 7.56940  | -5.18600 | 2.12200  |
| C | 7.04660  | -6.49820 | 1.50270  |
| C | 6.57750  | -4.05370 | 1.79310  |
| C | 7.64600  | -5.36470 | 3.65040  |
| C | 11.34750 | -7.26360 | -1.74050 |
| C | 12.71190 | -7.93440 | -1.48570 |
| C | 10.38920 | -8.27050 | -2.40320 |
| C | 11.54540 | -6.05310 | -2.67320 |
| C | 10.78560 | -3.18530 | 2.55380  |
| C | 11.10950 | -3.97800 | 3.83270  |
| C | 11.86620 | -3.46430 | 1.48470  |
| C | 10.78900 | -1.68110 | 2.88380  |
| H | 9.11640  | -2.80230 | 1.41710  |
| H | 9.70940  | -5.56550 | 2.02770  |
| H | 8.70100  | -6.83100 | -0.44500 |
| H | 10.99690 | -8.72880 | 3.18110  |
| H | 11.88740 | -9.77980 | 2.05210  |
| H | 12.78350 | -8.59240 | 3.05730  |
| H | 6.10860  | -6.78140 | 1.99270  |
| H | 6.81470  | -6.38870 | 0.43620  |
| H | 7.74610  | -7.33090 | 1.62800  |
| H | 5.57680  | -4.33020 | 2.14380  |
| H | 6.86270  | -3.12280 | 2.28990  |
| H | 6.51350  | -3.86490 | 0.71640  |
| H | 8.04130  | -4.46390 | 4.12570  |
| H | 6.64730  | -5.56020 | 4.05720  |
| H | 8.28670  | -6.21270 | 3.92210  |
| H | 13.17520 | -8.20020 | -2.44180 |
| H | 13.39950 | -7.26630 | -0.95500 |
| H | 12.61990 | -8.85570 | -0.90040 |
| H | 10.82510 | -8.63110 | -3.34160 |
| H | 10.19940 | -9.13910 | -1.76480 |
| H | 9.43000  | -7.80140 | -2.64140 |
| H | 10.60560 | -5.51450 | -2.81830 |
| H | 12.28310 | -5.35220 | -2.26370 |
| H | 11.91090 | -6.38780 | -3.65040 |
| H | 12.10950 | -3.71730 | 4.19610  |
| H | 10.38510 | -3.75160 | 4.62040  |

|   |          |          |          |
|---|----------|----------|----------|
| H | 11.09880 | -5.05930 | 3.65900  |
| H | 12.84470 | -3.09860 | 1.81640  |
| H | 11.97480 | -4.53700 | 1.29890  |
| H | 11.62160 | -2.96910 | 0.53890  |
| H | 10.02630 | -1.45230 | 3.63430  |
| H | 11.76500 | -1.37070 | 3.27070  |
| H | 10.57890 | -1.08270 | 1.98900  |
| H | 11.42890 | -5.93680 | -0.04220 |

80. N0000\_Anti120WP

|   |          |           |          |
|---|----------|-----------|----------|
| N | 8.78480  | -3.69720  | 2.24560  |
| C | 9.12870  | -4.94120  | 1.56030  |
| C | 9.10040  | -4.89220  | 0.04650  |
| N | 9.42570  | -6.15170  | -0.59960 |
| C | 8.31310  | -6.61230  | -1.45770 |
| C | 8.72960  | -7.81870  | -2.27510 |
| O | 7.68230  | -8.33190  | -2.93230 |
| C | 7.92940  | -9.45380  | -3.82630 |
| O | 9.86800  | -8.25300  | -2.35500 |
| O | 8.84770  | -3.88160  | -0.58740 |
| H | 7.83850  | -3.40990  | 1.98590  |
| H | 9.39480  | -2.94230  | 1.92380  |
| H | 8.45890  | -5.75400  | 1.87870  |
| H | 10.13730 | -5.27540  | 1.84580  |
| H | 10.23930 | -5.96800  | -1.20090 |
| H | 7.96440  | -5.84580  | -2.16640 |
| H | 7.45490  | -6.89150  | -0.83410 |
| H | 6.95720  | -9.69160  | -4.25800 |
| H | 8.63580  | -9.15810  | -4.60480 |
| H | 8.31980  | -10.30280 | -3.26190 |



## 81. N0010\_Anti120WP

|   |          |           |          |
|---|----------|-----------|----------|
| N | 8.95260  | -3.63440  | 2.20680  |
| C | 9.27820  | -4.89460  | 1.54000  |
| C | 9.10080  | -4.89330  | 0.03350  |
| N | 9.42770  | -6.15970  | -0.59360 |
| C | 8.41600  | -6.89410  | -1.41570 |
| C | 9.17460  | -8.14160  | -1.88490 |
| O | 8.46400  | -9.26370  | -1.72970 |
| C | 9.03850  | -10.50050 | -2.23970 |
| O | 10.30090 | -8.11530  | -2.36110 |
| O | 8.84530  | -3.87250  | -0.58040 |
| C | 7.68720  | -6.17850  | -2.63260 |
| C | 6.51930  | -5.31690  | -2.09890 |
| C | 8.66080  | -5.32850  | -3.46970 |
| C | 7.05710  | -7.25310  | -3.55130 |
| H | 7.97350  | -3.39830  | 2.02760  |
| H | 9.49040  | -2.87410  | 1.78410  |
| H | 8.67980  | -5.71700  | 1.95730  |
| H | 10.32550 | -5.17380  | 1.72630  |
| H | 10.23760 | -5.97000  | -1.19630 |
| H | 7.63130  | -7.23870  | -0.73330 |
| H | 9.23230  | -10.40590 | -3.31050 |
| H | 9.96370  | -10.73170 | -1.70770 |
| H | 8.28360  | -11.26410 | -2.05170 |
| H | 5.98480  | -4.86280  | -2.94110 |
| H | 5.80370  | -5.93700  | -1.54570 |
| H | 6.84950  | -4.51020  | -1.44580 |
| H | 9.08210  | -4.50450  | -2.89030 |
| H | 9.48380  | -5.93700  | -3.86120 |
| H | 8.12590  | -4.89910  | -4.32540 |
| H | 6.45620  | -6.75410  | -4.31960 |
| H | 7.81120  | -7.85700  | -4.06880 |
| H | 6.39670  | -7.92520  | -2.99300 |

## 82. N0100\_Anti120WP

|   |          |          |          |
|---|----------|----------|----------|
| N | 10.68200 | -4.80420 | 1.88580  |
| C | 9.23250  | -4.92530 | 1.58570  |
| C | 9.09900  | -4.88720 | 0.05800  |
| N | 9.42610  | -6.15300 | -0.60610 |
| C | 8.32380  | -6.61320 | -1.47960 |
| C | 7.17450  | -7.22070 | -0.67900 |
| O | 6.04940  | -7.25070 | -1.40980 |
| C | 4.86040  | -7.82820 | -0.79840 |
| O | 7.24730  | -7.63610 | 0.46550  |
| O | 8.84870  | -3.88530 | -0.59240 |
| C | 8.34460  | -3.91670 | 2.38910  |
| C | 8.85100  | -2.46240 | 2.29970  |
| C | 8.34720  | -4.35210 | 3.87190  |
| C | 6.88540  | -3.98630 | 1.88250  |
| H | 11.18940 | -5.61290 | 1.52150  |
| H | 11.08780 | -3.97660 | 1.44410  |
| H | 8.93710  | -5.93440 | 1.89120  |
| H | 10.22200 | -5.95210 | -1.22450 |
| H | 8.70790  | -7.40350 | -2.13730 |
| H | 7.91850  | -5.82260 | -2.12400 |
| H | 4.08570  | -7.75810 | -1.56170 |
| H | 5.04320  | -8.87020 | -0.52780 |
| H | 4.57860  | -7.25250 | 0.08580  |
| H | 9.85230  | -2.35690 | 2.73200  |
| H | 8.87670  | -2.10430 | 1.26680  |
| H | 8.18090  | -1.80590 | 2.86830  |
| H | 7.73790  | -3.65890 | 4.46430  |
| H | 7.91970  | -5.35510 | 3.99060  |
| H | 9.35750  | -4.35670 | 4.29170  |
| H | 6.50370  | -5.01440 | 1.90530  |
| H | 6.24080  | -3.38370 | 2.53350  |
| H | 6.78090  | -3.59980 | 0.86460  |

## 83. N0110\_Anti120WP

|   |          |           |          |
|---|----------|-----------|----------|
| N | 10.79110 | -4.87100  | 1.76260  |
| C | 9.32130  | -4.93260  | 1.55840  |
| C | 9.10040  | -4.89220  | 0.04010  |
| N | 9.42710  | -6.15720  | -0.59680 |
| C | 8.37770  | -6.83000  | -1.40750 |
| C | 8.79760  | -8.30730  | -1.38000 |
| O | 7.82280  | -9.09970  | -0.91090 |
| C | 8.09190  | -10.52750 | -0.83000 |
| O | 9.89340  | -8.72370  | -1.72790 |
| O | 8.84630  | -3.87610  | -0.58380 |
| C | 8.52090  | -3.89530  | 2.40770  |
| C | 9.03680  | -2.45100  | 2.24920  |
| C | 7.02870  | -3.95980  | 2.00980  |
| C | 8.63390  | -4.30650  | 3.89200  |
| C | 8.07470  | -6.33280  | -2.88270 |
| C | 7.41020  | -7.48200  | -3.67800 |
| C | 7.06680  | -5.16270  | -2.84840 |
| C | 9.36290  | -5.89200  | -3.60160 |
| H | 11.19900 | -4.07350  | 1.27040  |
| H | 11.23230 | -5.70870  | 1.37690  |
| H | 9.00530  | -5.92880  | 1.88910  |
| H | 10.27140 | -6.02470  | -1.15950 |
| H | 7.44140  | -6.76550  | -0.84340 |
| H | 7.17480  | -10.96860 | -0.43910 |
| H | 8.31760  | -10.92280 | -1.82280 |
| H | 8.92840  | -10.71200 | -0.15240 |
| H | 10.07710 | -2.35640  | 2.58080  |
| H | 8.96950  | -2.11000  | 1.21300  |
| H | 8.43410  | -1.77630  | 2.86940  |
| H | 6.43090  | -3.35720  | 2.70380  |
| H | 6.85500  | -3.57480  | 1.00100  |
| H | 6.65080  | -4.98920  | 2.05610  |
| H | 8.07850  | -3.60020  | 4.52020  |
| H | 8.21140  | -5.30500  | 4.05800  |
| H | 9.67460  | -4.31520  | 4.22990  |
| H | 7.10770  | -7.11260  | -4.66440 |
| H | 8.08890  | -8.32700  | -3.84020 |
| H | 6.51080  | -7.85110  | -3.17120 |
| H | 6.82720  | -4.85590  | -3.87370 |
| H | 6.12990  | -5.46550  | -2.36370 |
| H | 7.46430  | -4.29650  | -2.31900 |
| H | 9.80740  | -5.01080  | -3.12660 |
| H | 10.11070 | -6.69260  | -3.62140 |
| H | 9.13240  | -5.62370  | -4.63910 |

## 84. N011'0\_Anti120WP

|   |          |          |          |
|---|----------|----------|----------|
| N | 10.80990 | -4.97930 | 1.74950  |
| C | 9.33210  | -4.92480 | 1.56200  |
| C | 9.09970  | -4.88940 | 0.04540  |
| N | 9.42770  | -6.15940 | -0.59990 |
| C | 8.42870  | -6.87520 | -1.43440 |
| C | 7.19460  | -7.14160 | -0.57680 |
| O | 6.53250  | -8.24680 | -0.94430 |
| C | 5.29210  | -8.54180 | -0.24130 |
| O | 6.83090  | -6.41690 | 0.33600  |
| O | 8.84650  | -3.87670 | -0.58600 |
| C | 8.66340  | -3.80130 | 2.41820  |
| C | 9.30750  | -2.41580 | 2.20240  |
| C | 8.80930  | -4.19160 | 3.90610  |
| C | 7.15380  | -3.71140 | 2.10400  |
| C | 8.04610  | -6.27640 | -2.86290 |
| C | 7.64290  | -7.44900 | -3.78460 |
| C | 9.29010  | -5.59750 | -3.47110 |
| C | 6.88210  | -5.26420 | -2.80670 |
| H | 11.26680 | -4.19550 | 1.27760  |
| H | 11.17860 | -5.82860 | 1.31710  |
| H | 8.93840  | -5.88400 | 1.91240  |
| H | 10.27300 | -6.01440 | -1.15680 |
| H | 5.49090  | -8.70120 | 0.82080  |
| H | 4.58380  | -7.72030 | -0.37040 |
| H | 4.91250  | -9.45320 | -0.70300 |
| H | 8.80350  | -1.67620 | 2.83660  |
| H | 10.36810 | -2.41090 | 2.47780  |
| H | 9.21540  | -2.08810 | 1.16370  |
| H | 9.85930  | -4.26650 | 4.20310  |
| H | 8.32890  | -3.43660 | 4.53960  |
| H | 8.32560  | -5.15480 | 4.10970  |
| H | 6.66010  | -4.67690 | 2.24870  |
| H | 6.68330  | -2.98530 | 2.77780  |
| H | 6.96760  | -3.38830 | 1.07650  |
| H | 6.76380  | -7.98170 | -3.41060 |
| H | 7.40660  | -7.06540 | -4.78440 |
| H | 8.46350  | -8.17050 | -3.88380 |
| H | 10.15340 | -6.27540 | -3.48670 |
| H | 9.07660  | -5.31060 | -4.50710 |
| H | 9.56550  | -4.69320 | -2.92240 |
| H | 7.10250  | -4.42880 | -2.13910 |
| H | 6.70350  | -4.85890 | -3.81000 |
| H | 5.94790  | -5.73470 | -2.47720 |
| H | 8.89090  | -7.84750 | -1.63880 |

## 85. N1000\_Anti120WP

|   |          |          |          |
|---|----------|----------|----------|
| N | 8.80680  | -3.74550 | 2.28950  |
| C | 9.18460  | -4.95960 | 1.56590  |
| C | 9.09920  | -4.88770 | 0.05160  |
| N | 9.42640  | -6.15430 | -0.60310 |
| C | 8.32990  | -6.68270 | -1.44410 |
| C | 7.30090  | -7.46520 | -0.63160 |
| O | 6.22730  | -7.75770 | -1.38380 |
| C | 5.15610  | -8.52560 | -0.76340 |
| O | 7.41600  | -7.79570 | 0.53680  |
| O | 8.84820  | -3.88340 | -0.58900 |
| C | 7.38450  | -3.61550 | 2.75190  |
| C | 6.42730  | -3.57610 | 1.54770  |
| C | 7.29720  | -2.27650 | 3.50620  |
| C | 6.96280  | -4.75400 | 3.71020  |
| H | 9.40270  | -3.68260 | 3.11700  |
| H | 8.63360  | -5.86510 | 1.86100  |
| H | 10.23800 | -5.19780 | 1.77670  |
| H | 10.20370 | -5.93680 | -1.23930 |
| H | 8.75610  | -7.38010 | -2.17550 |
| H | 7.80210  | -5.90740 | -2.01620 |
| H | 4.74150  | -7.97290 | 0.08240  |
| H | 4.40540  | -8.65020 | -1.54400 |
| H | 5.53130  | -9.49570 | -0.43130 |
| H | 6.41450  | -4.52170 | 0.99520  |
| H | 5.40510  | -3.39800 | 1.90010  |
| H | 6.69960  | -2.77550 | 0.85320  |
| H | 7.55570  | -1.43940 | 2.84840  |
| H | 6.28060  | -2.11680 | 3.88250  |
| H | 7.97810  | -2.26440 | 4.36610  |
| H | 7.61990  | -4.78980 | 4.58740  |
| H | 5.93810  | -4.58750 | 4.06290  |
| H | 6.98080  | -5.73630 | 3.22610  |

## 86. N1010\_Anti120WP

|   |          |           |          |
|---|----------|-----------|----------|
| N | 8.91220  | -3.74600  | 2.27700  |
| C | 9.28950  | -4.95200  | 1.54310  |
| C | 9.10010  | -4.89070  | 0.03450  |
| N | 9.42820  | -6.16160  | -0.59470 |
| C | 8.42700  | -6.87910  | -1.43850 |
| C | 9.07480  | -8.25090  | -1.67100 |
| O | 8.24110  | -9.26350  | -1.40250 |
| C | 8.71870  | -10.61570 | -1.65400 |
| O | 10.22300 | -8.40870  | -2.06260 |
| O | 8.84550  | -3.87310  | -0.58030 |
| C | 7.91400  | -6.25180  | -2.80550 |
| C | 9.04880  | -5.54670  | -3.56880 |
| C | 7.33190  | -7.37710  | -3.69580 |
| C | 6.76120  | -5.26220  | -2.52440 |
| C | 7.50760  | -3.66220  | 2.79870  |
| C | 7.20430  | -4.76200  | 3.84280  |
| C | 7.37580  | -2.28320  | 3.46820  |
| C | 6.49080  | -3.76270  | 1.64790  |
| H | 9.53960  | -3.65880  | 3.07900  |
| H | 8.79970  | -5.87610  | 1.89160  |
| H | 10.36490 | -5.14380  | 1.67590  |
| H | 10.26570 | -5.99060  | -1.16240 |
| H | 7.54440  | -7.05390  | -0.81450 |
| H | 9.57410  | -10.83660 | -1.01170 |
| H | 7.87660  | -11.26480 | -1.41170 |
| H | 8.99800  | -10.72370 | -2.70460 |
| H | 8.67160  | -5.18430  | -4.53240 |
| H | 9.43140  | -4.68490  | -3.01510 |
| H | 9.88100  | -6.22970  | -3.77220 |
| H | 6.55070  | -7.94060  | -3.17400 |
| H | 8.09850  | -8.08220  | -4.03640 |
| H | 6.88160  | -6.93120  | -4.58970 |
| H | 5.93500  | -5.76460  | -2.00630 |
| H | 7.07950  | -4.41090  | -1.92260 |
| H | 6.37090  | -4.87480  | -3.47320 |
| H | 6.18860  | -4.64100  | 4.23660  |
| H | 7.26750  | -5.76770  | 3.41240  |
| H | 7.90230  | -4.70270  | 4.68660  |
| H | 8.10290  | -2.17030  | 4.28190  |
| H | 7.54270  | -1.48070  | 2.74160  |
| H | 6.37370  | -2.15910  | 3.89420  |
| H | 6.50100  | -4.74990  | 1.17200  |
| H | 5.48020  | -3.61010  | 2.04390  |
| H | 6.68100  | -3.00600  | 0.88150  |

## 87. N1100\_Anti120WP

|   |          |           |          |
|---|----------|-----------|----------|
| N | 10.21770 | -3.85550  | 2.01370  |
| C | 9.22760  | -4.85850  | 1.59690  |
| C | 9.09950  | -4.88890  | 0.05850  |
| N | 9.42530  | -6.14970  | -0.60590 |
| C | 8.29930  | -6.72510  | -1.37310 |
| C | 8.78360  | -7.91640  | -2.18150 |
| O | 7.76490  | -8.70250  | -2.54760 |
| C | 8.07080  | -9.86230  | -3.37390 |
| O | 9.94840  | -8.12220  | -2.48470 |
| O | 8.84910  | -3.88680  | -0.59320 |
| C | 7.84680  | -4.63590  | 2.33200  |
| C | 8.07060  | -4.91070  | 3.83250  |
| C | 6.79480  | -5.62890  | 1.79990  |
| C | 7.32960  | -3.19560  | 2.16140  |
| C | 11.63920 | -4.24040  | 2.22040  |
| C | 12.38150 | -2.93480  | 2.55830  |
| C | 11.75270 | -5.20180  | 3.41900  |
| C | 12.28720 | -4.88680  | 0.97600  |
| H | 10.16200 | -3.03140  | 1.41770  |
| H | 9.58130  | -5.84720  | 1.89700  |
| H | 10.14860 | -5.90940  | -1.29510 |
| H | 7.84450  | -6.01500  | -2.08360 |
| H | 7.51010  | -7.06260  | -0.69560 |
| H | 7.11160  | -10.35110 | -3.54380 |
| H | 8.51410  | -9.54070  | -4.31840 |
| H | 8.75370  | -10.52720 | -2.84140 |
| H | 7.14140  | -4.73460  | 4.38720  |
| H | 8.37470  | -5.94970  | 4.00740  |
| H | 8.84330  | -4.25320  | 4.23910  |
| H | 5.87950  | -5.56010  | 2.39940  |
| H | 6.51360  | -5.41400  | 0.76250  |
| H | 7.15190  | -6.66440  | 1.86110  |
| H | 7.13070  | -2.95390  | 1.11330  |
| H | 6.39360  | -3.07310  | 2.71980  |
| H | 8.05000  | -2.47150  | 2.55430  |
| H | 13.44120 | -3.13740  | 2.74760  |
| H | 12.31790 | -2.22040  | 1.72790  |
| H | 11.95180 | -2.46640  | 3.45040  |
| H | 12.80650 | -5.43420  | 3.61020  |
| H | 11.32950 | -4.74700  | 4.32040  |
| H | 11.23840 | -6.15220  | 3.23860  |
| H | 12.21870 | -4.21740  | 0.11030  |
| H | 13.34750 | -5.09960  | 1.15590  |
| H | 11.79890 | -5.83370  | 0.72230  |

## 88. N1110\_Anti120WP

|   |          |           |          |
|---|----------|-----------|----------|
| N | 10.18740 | -3.70740  | 1.94320  |
| C | 9.32290  | -4.83190  | 1.57600  |
| C | 9.10000  | -4.89050  | 0.04700  |
| N | 9.42680  | -6.15590  | -0.60030 |
| C | 8.42660  | -6.94120  | -1.38380 |
| C | 9.20290  | -8.21670  | -1.74030 |
| O | 8.54760  | -9.32920  | -1.38800 |
| C | 9.16720  | -10.60600 | -1.71310 |
| O | 10.29910 | -8.22240  | -2.28280 |
| O | 8.84710  | -3.87910  | -0.58720 |
| C | 7.96010  | -4.78710  | 2.37610  |
| C | 8.27890  | -5.02790  | 3.86470  |
| C | 7.01940  | -5.90600  | 1.88560  |
| C | 7.25870  | -3.42350  | 2.22690  |
| C | 7.72630  | -6.31980  | -2.66230 |
| C | 7.11350  | -7.47120  | -3.49570 |
| C | 6.55780  | -5.40690  | -2.22790 |
| C | 8.71620  | -5.53370  | -3.54070 |
| C | 11.65890 | -3.90540  | 2.01960  |
| C | 11.99670 | -4.83930  | 3.19750  |
| C | 12.27320 | -4.47190  | 0.71910  |
| C | 12.25470 | -2.51370  | 2.29690  |
| H | 9.97800  | -2.90360  | 1.35370  |
| H | 9.81190  | -5.76730  | 1.85530  |
| H | 10.19000 | -5.93210  | -1.24780 |
| H | 7.63120  | -7.24170  | -0.69670 |
| H | 8.46570  | -11.36090 | -1.35740 |
| H | 9.30770  | -10.68780 | -2.79340 |
| H | 10.12730 | -10.69650 | -1.19990 |
| H | 8.71870  | -6.02070  | 4.02130  |
| H | 8.97950  | -4.27710  | 4.23990  |
| H | 7.35850  | -4.97070  | 4.45820  |
| H | 6.13020  | -5.95470  | 2.52490  |
| H | 6.66450  | -5.72690  | 0.86410  |
| H | 7.50760  | -6.88790  | 1.91920  |
| H | 7.00150  | -3.20620  | 1.18520  |
| H | 6.32910  | -3.42240  | 2.80910  |
| H | 7.89070  | -2.61270  | 2.60360  |
| H | 6.52460  | -7.04850  | -4.31730 |
| H | 7.87820  | -8.11740  | -3.94170 |
| H | 6.44440  | -8.09390  | -2.89080 |
| H | 6.03440  | -5.03610  | -3.11730 |
| H | 5.82930  | -5.96160  | -1.62340 |
| H | 6.89470  | -4.54090  | -1.65750 |
| H | 9.11760  | -4.66410  | -3.01300 |
| H | 9.55200  | -6.16200  | -3.86660 |
| H | 8.20030  | -5.17150  | -4.43770 |
| H | 13.08380 | -4.93080  | 3.30140  |



|   |          |          |          |
|---|----------|----------|----------|
| H | 11.59060 | -4.44130 | 4.13310  |
| H | 11.59790 | -5.84930 | 3.05150  |
| H | 13.36430 | -4.53700 | 0.80230  |
| H | 11.90170 | -5.48130 | 0.51040  |
| H | 12.03800 | -3.82850 | -0.13710 |
| H | 11.84180 | -2.09550 | 3.22120  |
| H | 13.34340 | -2.57710 | 2.39850  |
| H | 12.03230 | -1.82130 | 1.47520  |

## 89. N111'0\_Anti120WP

|   |          |           |          |
|---|----------|-----------|----------|
| N | 10.20800 | -3.88740  | 2.02110  |
| C | 9.20250  | -4.87320  | 1.59330  |
| C | 9.10030  | -4.89200  | 0.05200  |
| N | 9.42550  | -6.15080  | -0.60210 |
| C | 8.32470  | -6.75530  | -1.38960 |
| C | 8.27900  | -6.15190  | -2.80110 |
| O | 7.02920  | -5.92350  | -3.22060 |
| C | 6.85420  | -5.40070  | -4.56820 |
| O | 9.27260  | -5.91260  | -3.47450 |
| O | 8.84800  | -3.88260  | -0.59040 |
| C | 7.82490  | -4.63210  | 2.32870  |
| C | 8.04770  | -4.92360  | 3.82760  |
| C | 6.75000  | -5.60120  | 1.79880  |
| C | 7.32980  | -3.18290  | 2.16750  |
| C | 8.43990  | -8.32960  | -1.41520 |
| C | 8.24780  | -8.84500  | 0.02640  |
| C | 7.32380  | -8.92450  | -2.30070 |
| C | 9.81440  | -8.78960  | -1.93870 |
| C | 11.62510 | -4.29580  | 2.21570  |
| C | 12.25340 | -4.95780  | 0.96890  |
| C | 12.39050 | -3.00100  | 2.54280  |
| C | 11.73240 | -5.25570  | 3.41590  |
| H | 10.16460 | -3.06080  | 1.42740  |
| H | 9.54190  | -5.86740  | 1.88970  |
| H | 10.19680 | -5.95540  | -1.24840 |
| H | 7.35400  | -4.43350  | -4.66030 |
| H | 7.25980  | -6.10640  | -5.29670 |
| H | 5.77650  | -5.29290  | -4.69460 |
| H | 7.12110  | -4.74500  | 4.38630  |
| H | 8.34150  | -5.96830  | 3.99110  |
| H | 8.82880  | -4.27920  | 4.23970  |
| H | 5.83740  | -5.50970  | 2.39930  |
| H | 6.47160  | -5.38190  | 0.76120  |
| H | 7.08110  | -6.64400  | 1.86030  |
| H | 7.13470  | -2.93400  | 1.12000  |
| H | 6.39510  | -3.05120  | 2.72620  |
| H | 8.06070  | -2.47110  | 2.56420  |
| H | 8.36930  | -9.93430  | 0.04990  |
| H | 8.98330  | -8.40280  | 0.70490  |
| H | 7.24340  | -8.61490  | 0.40220  |
| H | 7.33230  | -10.01710 | -2.21000 |
| H | 6.33240  | -8.57010  | -1.99220 |
| H | 7.45950  | -8.68130  | -3.36100 |
| H | 9.98970  | -8.46280  | -2.96930 |
| H | 10.62940 | -8.41270  | -1.31080 |
| H | 9.86110  | -9.88520  | -1.92190 |
| H | 13.31320 | -5.18000  | 1.14120  |
| H | 11.75350 | -5.90150  | 0.72620  |

|   |          |          |          |
|---|----------|----------|----------|
| H | 12.18490 | -4.29320 | 0.09910  |
| H | 13.44770 | -3.21910 | 2.72880  |
| H | 12.33400 | -2.29110 | 1.70820  |
| H | 11.97190 | -2.52060 | 3.43370  |
| H | 11.20110 | -6.19760 | 3.24080  |
| H | 12.78360 | -5.50480 | 3.60010  |
| H | 11.32270 | -4.79240 | 4.31910  |
| H | 7.37300  | -6.51850 | -0.90730 |

90. N0000\_Anti-120WP

|   |          |          |          |
|---|----------|----------|----------|
| N | 8.79500  | -3.69240 | 2.24420  |
| C | 9.09860  | -4.94790 | 1.56030  |
| C | 9.10040  | -4.89210 | 0.04640  |
| N | 9.42580  | -6.15200 | -0.59960 |
| C | 10.60690 | -6.01070 | -1.47770 |
| C | 10.82200 | -7.26650 | -2.29830 |
| O | 11.96010 | -7.18580 | -2.99880 |
| C | 12.28030 | -8.28530 | -3.89740 |
| O | 10.05580 | -8.21600 | -2.34460 |
| O | 8.84770  | -3.88150 | -0.58730 |
| H | 7.89110  | -3.33360 | 1.92870  |
| H | 9.47700  | -2.97950 | 1.97600  |
| H | 8.38230  | -5.73100 | 1.84970  |
| H | 10.08070 | -5.33050 | 1.87630  |
| H | 8.61510  | -6.40260 | -1.18020 |
| H | 11.50240 | -5.83630 | -0.86800 |
| H | 10.52730 | -5.17080 | -2.18400 |
| H | 13.21470 | -7.99540 | -4.37750 |
| H | 12.40870 | -9.20750 | -3.32730 |
| H | 11.48610 | -8.40310 | -4.63720 |

91. N0010\_Anti-120WP

|   |          |          |          |
|---|----------|----------|----------|
| N | 8.86360  | -3.66490 | 2.22640  |
| C | 9.10620  | -4.94220 | 1.55720  |
| C | 9.10080  | -4.89390 | 0.04330  |
| N | 9.42580  | -6.15220 | -0.59770 |
| C | 10.63490 | -6.01650 | -1.45240 |
| C | 10.32690 | -5.19070 | -2.71210 |
| O | 11.21960 | -4.20790 | -2.89310 |
| C | 11.03260 | -3.32350 | -4.03180 |
| O | 9.38320  | -5.39570 | -3.46230 |
| O | 8.84720  | -3.87950 | -0.58600 |
| C | 11.28210 | -7.41080 | -1.77720 |
| C | 11.82470 | -8.00890 | -0.46260 |
| C | 10.26590 | -8.38530 | -2.40330 |
| C | 12.46590 | -7.20670 | -2.74710 |
| H | 7.98730  | -3.26000 | 1.88890  |
| H | 9.58910  | -2.99760 | 1.95290  |
| H | 8.35690  | -5.69090 | 1.85430  |
| H | 10.07100 | -5.36290 | 1.87430  |
| H | 8.62420  | -6.41330 | -1.18410 |
| H | 11.37770 | -5.45210 | -0.87780 |
| H | 11.08130 | -3.89240 | -4.96280 |
| H | 10.06960 | -2.81390 | -3.95020 |
| H | 11.85290 | -2.60770 | -3.97370 |
| H | 12.27760 | -8.98720 | -0.66040 |
| H | 12.59560 | -7.36630 | -0.02060 |
| H | 11.02800 | -8.14410 | 0.27380  |
| H | 9.43360  | -8.59690 | -1.72300 |
| H | 9.85610  | -7.99650 | -3.34020 |
| H | 10.76140 | -9.33840 | -2.62140 |
| H | 12.98820 | -8.15900 | -2.89320 |
| H | 12.13900 | -6.85610 | -3.73280 |
| H | 13.18790 | -6.48470 | -2.34830 |

92. N0100\_Anti-120WP

|   |          |          |          |
|---|----------|----------|----------|
| N | 9.70370  | -3.62200 | 2.10190  |
| C | 9.17790  | -4.89710 | 1.58510  |
| C | 9.10040  | -4.89230 | 0.04950  |
| N | 9.42550  | -6.15070 | -0.60090 |
| C | 10.52800 | -5.99620 | -1.56940 |
| C | 10.83280 | -7.33070 | -2.22290 |
| O | 12.09080 | -7.37600 | -2.67770 |
| C | 12.50820 | -8.57720 | -3.38630 |
| O | 10.02830 | -8.24150 | -2.34830 |
| O | 8.84800  | -3.88250 | -0.58910 |
| C | 7.80240  | -5.29070 | 2.26110  |
| C | 6.79410  | -4.12470 | 2.20690  |
| C | 8.07670  | -5.66080 | 3.73330  |
| C | 7.18230  | -6.51860 | 1.56040  |
| H | 10.65440 | -3.48520 | 1.75090  |
| H | 9.16190  | -2.84320 | 1.72320  |
| H | 9.89300  | -5.68640 | 1.84540  |
| H | 8.59190  | -6.48570 | -1.09480 |
| H | 11.42350 | -5.63960 | -1.05090 |
| H | 10.31240 | -5.28190 | -2.37970 |
| H | 13.55540 | -8.40760 | -3.63850 |
| H | 12.40310 | -9.44810 | -2.73540 |
| H | 11.90760 | -8.70380 | -4.29020 |
| H | 7.13490  | -3.25910 | 2.78490  |
| H | 6.59900  | -3.79930 | 1.17890  |
| H | 5.83950  | -4.44900 | 2.63870  |
| H | 7.13600  | -5.91180 | 4.23770  |
| H | 8.73730  | -6.53280 | 3.80430  |
| H | 8.54160  | -4.83300 | 4.27610  |
| H | 7.88560  | -7.35620 | 1.51630  |
| H | 6.29610  | -6.84980 | 2.11410  |
| H | 6.85430  | -6.28970 | 0.53900  |

## 93. N0110\_Anti-120WP

|   |          |          |          |
|---|----------|----------|----------|
| N | 9.57070  | -3.60850 | 2.12200  |
| C | 9.15130  | -4.91280 | 1.57920  |
| C | 9.10120  | -4.89510 | 0.04470  |
| N | 9.42530  | -6.15000 | -0.59800 |
| C | 10.59640 | -6.04810 | -1.49780 |
| C | 10.21040 | -5.43130 | -2.84870 |
| O | 11.09100 | -4.50530 | -3.24970 |
| C | 10.84680 | -3.84470 | -4.52190 |
| O | 9.21710  | -5.74370 | -3.49080 |
| O | 8.84740  | -3.88040 | -0.58720 |
| C | 7.80340  | -5.42390 | 2.23200  |
| C | 6.70270  | -4.34800 | 2.14340  |
| C | 7.29760  | -6.71050 | 1.54360  |
| C | 8.08600  | -5.75460 | 3.71270  |
| C | 11.31520 | -7.44300 | -1.63670 |
| C | 12.52500 | -7.31120 | -2.58490 |
| C | 11.82510 | -7.85240 | -0.23860 |
| C | 10.35830 | -8.52900 | -2.16550 |
| H | 8.99070  | -2.86700 | 1.72510  |
| H | 10.51920 | -3.40520 | 1.79770  |
| H | 9.92110  | -5.64750 | 1.84380  |
| H | 8.61080  | -6.45770 | -1.13770 |
| H | 11.32060 | -5.37000 | -1.03320 |
| H | 11.66300 | -3.13060 | -4.63300 |
| H | 10.86080 | -4.57680 | -5.33240 |
| H | 9.88430  | -3.32910 | -4.49470 |
| H | 6.96390  | -3.44550 | 2.70650  |
| H | 6.49690  | -4.06110 | 1.10560  |
| H | 5.77190  | -4.74230 | 2.56870  |
| H | 6.44360  | -7.10780 | 2.10450  |
| H | 6.95120  | -6.52720 | 0.51970  |
| H | 8.07190  | -7.48330 | 1.50920  |
| H | 7.16230  | -6.08070 | 4.20530  |
| H | 8.81690  | -6.56750 | 3.80050  |
| H | 8.47280  | -4.88620 | 4.25290  |
| H | 13.08680 | -8.25260 | -2.59370 |
| H | 12.22430 | -7.09740 | -3.61670 |
| H | 13.20510 | -6.51680 | -2.25510 |
| H | 12.33020 | -8.82350 | -0.29800 |
| H | 12.54500 | -7.12300 | 0.15330  |
| H | 10.99880 | -7.93450 | 0.47250  |
| H | 9.49890  | -8.66750 | -1.50070 |
| H | 9.98680  | -8.29220 | -3.16740 |
| H | 10.88960 | -9.48650 | -2.22150 |

94. N011'0\_Anti-120WP

|   |          |           |          |
|---|----------|-----------|----------|
| N | 9.36910  | -3.68420  | 2.19010  |
| C | 8.94650  | -4.95290  | 1.56320  |
| C | 9.10100  | -4.89450  | 0.03770  |
| N | 9.42680  | -6.15600  | -0.59510 |
| C | 10.66410 | -6.30600  | -1.41590 |
| C | 10.65150 | -7.80230  | -1.76310 |
| O | 11.78030 | -8.42300  | -1.39880 |
| C | 11.89480 | -9.84310  | -1.70010 |
| O | 9.71370  | -8.37100  | -2.30380 |
| O | 8.84600  | -3.87500  | -0.58310 |
| C | 7.48610  | -5.37130  | 2.00830  |
| C | 6.47250  | -4.23740  | 1.75380  |
| C | 7.53250  | -5.69050  | 3.51760  |
| C | 7.01280  | -6.63930  | 1.26530  |
| C | 10.91850 | -5.41180  | -2.69700 |
| C | 12.01590 | -6.08790  | -3.55460 |
| C | 11.47170 | -4.03400  | -2.26840 |
| C | 9.64670  | -5.23780  | -3.54660 |
| H | 8.91580  | -2.90150  | 1.71460  |
| H | 10.37000 | -3.55300  | 2.02690  |
| H | 9.61910  | -5.74350  | 1.91720  |
| H | 8.63290  | -6.38110  | -1.20420 |
| H | 11.10460 | -10.39840 | -1.18990 |
| H | 11.83030 | -10.00140 | -2.77900 |
| H | 12.87640 | -10.13480 | -1.32590 |
| H | 5.47210  | -4.56920  | 2.05720  |
| H | 6.70760  | -3.33710  | 2.33140  |
| H | 6.42370  | -3.96470  | 0.69410  |
| H | 7.87570  | -4.83060  | 4.09900  |
| H | 6.53190  | -5.96680  | 3.87080  |
| H | 8.20460  | -6.53310  | 3.72000  |
| H | 7.74300  | -7.45080  | 1.34500  |
| H | 6.06910  | -6.98430  | 1.70320  |
| H | 6.82330  | -6.45370  | 0.20190  |
| H | 11.67860 | -7.03180  | -3.99820 |
| H | 12.29260 | -5.42030  | -4.37830 |
| H | 12.91990 | -6.28480  | -2.96650 |
| H | 12.38470 | -4.14820  | -1.67080 |
| H | 11.72910 | -3.44970  | -3.15950 |
| H | 10.75060 | -3.45700  | -1.69040 |
| H | 8.86420  | -4.70930  | -2.99540 |
| H | 9.88270  | -4.64930  | -4.44110 |
| H | 9.24960  | -6.20390  | -3.87630 |
| H | 11.51570 | -6.14880  | -0.74480 |



95. N1000\_Anti-120WP

|   |          |          |          |
|---|----------|----------|----------|
| N | 8.71950  | -3.75520 | 2.30530  |
| C | 9.00370  | -4.97990 | 1.56310  |
| C | 9.09960  | -4.88930 | 0.05000  |
| N | 9.42640  | -6.15430 | -0.60200 |
| C | 10.65060 | -6.07190 | -1.42850 |
| C | 11.91930 | -6.12100 | -0.58150 |
| O | 12.99510 | -5.81050 | -1.32230 |
| C | 14.29460 | -5.82470 | -0.66440 |
| O | 11.97340 | -6.40140 | 0.60510  |
| O | 8.84780  | -3.88190 | -0.58850 |
| C | 9.86340  | -2.90740 | 2.77480  |
| C | 10.70630 | -3.68700 | 3.80190  |
| C | 9.23150  | -1.68920 | 3.47400  |
| C | 10.77390 | -2.41120 | 1.62950  |
| H | 8.08980  | -3.17090 | 1.75280  |
| H | 8.20940  | -5.72530 | 1.73820  |
| H | 9.91400  | -5.46660 | 1.92550  |
| H | 8.64780  | -6.34730 | -1.24570 |
| H | 10.69330 | -5.17520 | -2.06170 |
| H | 10.67600 | -6.93940 | -2.09970 |
| H | 14.51550 | -6.82660 | -0.29030 |
| H | 15.00700 | -5.53510 | -1.43710 |
| H | 14.30660 | -5.10480 | 0.15710  |
| H | 11.22260 | -4.54560 | 3.35890  |
| H | 11.47800 | -3.02870 | 4.21680  |
| H | 10.08410 | -4.04550 | 4.62950  |
| H | 8.62400  | -2.00200 | 4.33040  |
| H | 10.01210 | -1.01130 | 3.83720  |
| H | 8.59210  | -1.12440 | 2.78400  |
| H | 10.20040 | -1.83610 | 0.89480  |
| H | 11.56590 | -1.76630 | 2.02910  |
| H | 11.26330 | -3.24020 | 1.10780  |

96. N1010\_Anti-120WP

|   |          |          |          |
|---|----------|----------|----------|
| N | 8.82510  | -3.71830 | 2.20830  |
| C | 9.15330  | -4.97410 | 1.54140  |
| C | 9.10120  | -4.89520 | 0.03880  |
| N | 9.42630  | -6.15390 | -0.59540 |
| C | 10.66300 | -6.08520 | -1.42060 |
| C | 10.29510 | -5.84070 | -2.88830 |
| O | 11.18570 | -5.07060 | -3.51980 |
| C | 10.97440 | -4.81770 | -4.93830 |
| O | 9.29770  | -6.30370 | -3.42580 |
| O | 8.84640  | -3.87630 | -0.58390 |
| C | 11.56560 | -7.36490 | -1.21890 |
| C | 10.79550 | -8.65590 | -1.55460 |
| C | 12.82970 | -7.27280 | -2.10070 |
| C | 12.00960 | -7.39930 | 0.25880  |
| C | 9.07080  | -3.67860 | 3.68510  |
| C | 10.53580 | -4.00360 | 4.06070  |
| C | 8.74470  | -2.24520 | 4.13750  |
| C | 8.12400  | -4.66780 | 4.38780  |
| H | 9.37900  | -2.97480 | 1.77580  |
| H | 8.46210  | -5.77700 | 1.83340  |
| H | 10.15940 | -5.36550 | 1.77020  |
| H | 8.63820  | -6.41930 | -1.19620 |
| H | 11.26050 | -5.22710 | -1.09330 |
| H | 10.02810 | -4.29200 | -5.08620 |
| H | 11.81490 | -4.19390 | -5.24350 |
| H | 10.97310 | -5.76080 | -5.48860 |
| H | 11.43510 | -9.52510 | -1.36190 |
| H | 9.89710  | -8.75960 | -0.93660 |
| H | 10.49690 | -8.68900 | -2.60820 |
| H | 13.37300 | -6.33670 | -1.92590 |
| H | 12.60030 | -7.34130 | -3.16940 |
| H | 13.50250 | -8.10230 | -1.85400 |
| H | 12.59110 | -6.50650 | 0.52070  |
| H | 11.15160 | -7.46270 | 0.93360  |
| H | 12.64520 | -8.27450 | 0.43410  |
| H | 10.68660 | -3.86730 | 5.13790  |
| H | 10.80230 | -5.03960 | 3.82540  |
| H | 11.23220 | -3.33840 | 3.53580  |
| H | 9.40120  | -1.51910 | 3.64150  |
| H | 7.70510  | -1.98960 | 3.90380  |
| H | 8.88920  | -2.14450 | 5.21870  |
| H | 8.34410  | -5.70670 | 4.11970  |
| H | 8.23580  | -4.58080 | 5.47400  |
| H | 7.07900  | -4.45660 | 4.13410  |

97. N1100\_Anti-120WP

|   |          |          |          |
|---|----------|----------|----------|
| N | 8.75450  | -3.57790 | 2.11200  |
| C | 8.94420  | -4.93410 | 1.58540  |
| C | 9.10150  | -4.89660 | 0.05440  |
| N | 9.42270  | -6.13970 | -0.60190 |
| C | 10.73500 | -6.14290 | -1.27350 |
| C | 10.93550 | -7.47180 | -1.98370 |
| O | 12.23030 | -7.70430 | -2.23160 |
| C | 12.56880 | -8.91960 | -2.95960 |
| O | 10.03210 | -8.22240 | -2.31530 |
| O | 8.84970  | -3.88910 | -0.59310 |
| C | 7.78010  | -5.93170 | 2.05180  |
| C | 7.51670  | -5.71470 | 3.55720  |
| C | 8.19070  | -7.41000 | 1.88220  |
| C | 6.48170  | -5.64390 | 1.27430  |
| C | 9.89210  | -2.90160 | 2.80480  |
| C | 9.38980  | -1.48830 | 3.15200  |
| C | 10.25070 | -3.63330 | 4.11130  |
| C | 11.15390 | -2.78960 | 1.91770  |
| H | 8.46740  | -2.97870 | 1.33890  |
| H | 9.87370  | -5.37280 | 1.97500  |
| H | 8.71700  | -6.25120 | -1.33870 |
| H | 11.53520 | -6.01480 | -0.53670 |
| H | 10.84920 | -5.34640 | -2.02810 |
| H | 13.65580 | -8.90830 | -3.04110 |
| H | 12.23250 | -9.79450 | -2.39920 |
| H | 12.10630 | -8.90340 | -3.94880 |
| H | 6.72010  | -6.39550 | 3.88030  |
| H | 8.40730  | -5.94010 | 4.15400  |
| H | 7.21150  | -4.68950 | 3.77360  |
| H | 7.41640  | -8.05300 | 2.31840  |
| H | 8.33310  | -7.68790 | 0.83840  |
| H | 9.12990  | -7.61420 | 2.41220  |
| H | 6.58090  | -5.87280 | 0.20620  |
| H | 5.66280  | -6.25880 | 1.66570  |
| H | 6.18660  | -4.59270 | 1.37210  |
| H | 10.16980 | -0.91820 | 3.66880  |
| H | 9.11180  | -0.93510 | 2.24610  |
| H | 8.51140  | -1.54240 | 3.80490  |
| H | 11.04930 | -3.08930 | 4.62840  |
| H | 9.38610  | -3.68950 | 4.77940  |
| H | 10.61390 | -4.65120 | 3.93070  |
| H | 10.93360 | -2.24610 | 0.99180  |
| H | 11.94830 | -2.25060 | 2.44770  |
| H | 11.55100 | -3.77670 | 1.65310  |

## 98. N1110\_Anti-120WP

|   |          |          |          |
|---|----------|----------|----------|
| N | 9.40860  | -3.60550 | 2.16690  |
| C | 9.10500  | -4.91340 | 1.58380  |
| C | 9.10110  | -4.89500 | 0.04670  |
| N | 9.42510  | -6.14940 | -0.59890 |
| C | 10.62010 | -6.11090 | -1.47290 |
| C | 10.21000 | -5.77850 | -2.91390 |
| O | 11.10130 | -5.00450 | -3.54150 |
| C | 10.84030 | -4.67340 | -4.93520 |
| O | 9.18140  | -6.18540 | -3.43790 |
| O | 8.84760  | -3.88120 | -0.58830 |
| C | 7.72510  | -5.47630 | 2.15300  |
| C | 7.89900  | -5.67810 | 3.67140  |
| C | 7.34460  | -6.83500 | 1.53030  |
| C | 6.59040  | -4.46660 | 1.90180  |
| C | 11.43310 | -7.46120 | -1.37410 |
| C | 12.64940 | -7.42430 | -2.32250 |
| C | 11.94500 | -7.59830 | 0.07460  |
| C | 10.54970 | -8.67630 | -1.71550 |
| C | 10.79710 | -3.30270 | 2.60990  |
| C | 11.16570 | -4.17370 | 3.82650  |
| C | 11.85430 | -3.49540 | 1.49880  |
| C | 10.78800 | -1.82610 | 3.04390  |
| H | 9.09250  | -2.87410 | 1.53220  |
| H | 9.86660  | -5.64050 | 1.87880  |
| H | 8.61870  | -6.44790 | -1.15370 |
| H | 11.28650 | -5.31160 | -1.13540 |
| H | 11.68270 | -4.05420 | -5.24350 |
| H | 10.79320 | -5.58660 | -5.53270 |
| H | 9.90220  | -4.12040 | -5.01690 |
| H | 8.66490  | -6.43340 | 3.88640  |
| H | 8.18820  | -4.74530 | 4.16080  |
| H | 6.95540  | -6.02380 | 4.11020  |
| H | 6.48160  | -7.24760 | 2.06600  |
| H | 7.05640  | -6.74960 | 0.47720  |
| H | 8.16470  | -7.55680 | 1.59970  |
| H | 6.42130  | -4.30130 | 0.83150  |
| H | 5.65530  | -4.84580 | 2.33040  |
| H | 6.81010  | -3.50270 | 2.37060  |
| H | 13.27000 | -8.31120 | -2.15040 |
| H | 12.35510 | -7.42860 | -3.37780 |
| H | 13.27190 | -6.53930 | -2.14490 |
| H | 12.49390 | -8.54000 | 0.18740  |
| H | 12.62880 | -6.78150 | 0.33580  |
| H | 11.11540 | -7.59730 | 0.78660  |
| H | 9.68790  | -8.74390 | -1.04350 |
| H | 10.18380 | -8.63870 | -2.74710 |
| H | 11.13530 | -9.59610 | -1.60210 |
| H | 12.16890 | -3.91200 | 4.18160  |

|   |          |          |         |
|---|----------|----------|---------|
| H | 10.45730 | -4.01420 | 4.64560 |
| H | 11.17410 | -5.24210 | 3.58460 |
| H | 12.84970 | -3.21070 | 1.85940 |
| H | 11.91560 | -4.54210 | 1.18120 |
| H | 11.62030 | -2.87850 | 0.62330 |
| H | 10.05340 | -1.66540 | 3.84030 |
| H | 11.77480 | -1.52940 | 3.41590 |
| H | 10.53380 | -1.17030 | 2.20170 |

99. N111'0\_Anti-120WP

|   |          |           |          |
|---|----------|-----------|----------|
| N | 8.66480  | -3.61260  | 2.11080  |
| C | 8.81290  | -4.96520  | 1.55990  |
| C | 9.10150  | -4.89670  | 0.04680  |
| N | 9.42410  | -6.14510  | -0.59850 |
| C | 10.73080 | -6.39350  | -1.27320 |
| C | 10.59980 | -7.85920  | -1.71520 |
| O | 11.60630 | -8.62340  | -1.27410 |
| C | 11.59920 | -10.03030 | -1.65130 |
| O | 9.67240  | -8.28610  | -2.38900 |
| O | 8.84830  | -3.88370  | -0.58890 |
| C | 7.55220  | -5.88830  | 1.90480  |
| C | 7.24810  | -5.73220  | 3.41080  |
| C | 7.84170  | -7.38620  | 1.66490  |
| C | 6.31850  | -5.44700  | 1.09480  |
| C | 11.22780 | -5.47070  | -2.45680 |
| C | 11.79920 | -4.15630  | -1.88080 |
| C | 12.38790 | -6.19520  | -3.18090 |
| C | 10.11090 | -5.16600  | -3.47100 |
| C | 9.81150  | -3.00440  | 2.84940  |
| C | 11.11600 | -2.96660  | 2.02020  |
| C | 9.38150  | -1.56310  | 3.17760  |
| C | 10.06620 | -3.75970  | 4.16620  |
| H | 8.42890  | -2.98910  | 1.33980  |
| H | 9.67240  | -5.47140  | 2.01990  |
| H | 8.70710  | -6.25050  | -1.32600 |
| H | 10.70350 | -10.51650 | -1.25860 |
| H | 11.63390 | -10.12550 | -2.73900 |
| H | 12.49780 | -10.45060 | -1.19840 |
| H | 6.38660  | -6.35930  | 3.66960  |
| H | 8.09620  | -6.06240  | 4.02250  |
| H | 7.02220  | -4.69720  | 3.67360  |
| H | 7.01560  | -7.98130  | 2.07310  |
| H | 7.95770  | -7.63380  | 0.60990  |
| H | 8.76140  | -7.69340  | 2.17990  |
| H | 6.45200  | -5.61090  | 0.01840  |
| H | 5.43780  | -6.02040  | 1.40710  |
| H | 6.09920  | -4.38450  | 1.25290  |
| H | 12.22630 | -3.55660  | -2.69310 |
| H | 11.03730 | -3.55070  | -1.38910 |
| H | 12.60200 | -4.35890  | -1.16050 |
| H | 12.82360 | -5.52240  | -3.92790 |
| H | 13.18380 | -6.48020  | -2.48270 |
| H | 12.05280 | -7.09540  | -3.70880 |
| H | 9.70470  | -6.08320  | -3.91010 |
| H | 9.29220  | -4.60750  | -3.00950 |
| H | 10.51630 | -4.55520  | -4.28620 |
| H | 11.91560 | -2.47520  | 2.58720  |
| H | 11.46720 | -3.97450  | 1.76960  |

|   |          |          |          |
|---|----------|----------|----------|
| H | 10.97080 | -2.41050 | 1.08760  |
| H | 10.17150 | -1.04070 | 3.72840  |
| H | 9.17840  | -0.99500 | 2.26120  |
| H | 8.47360  | -1.56230 | 3.79080  |
| H | 10.37850 | -4.79590 | 3.99430  |
| H | 10.86910 | -3.26560 | 4.72530  |
| H | 9.16760  | -3.76960 | 4.79070  |
| H | 11.50790 | -6.36570 | -0.50140 |

|      |                |          |          |
|------|----------------|----------|----------|
| 100. | N0010_Syn-60WP |          |          |
| N    | 8.89580        | -3.56230 | 2.17150  |
| C    | 9.03460        | -4.90110 | 1.58170  |
| C    | 9.09980        | -4.89020 | 0.06420  |
| N    | 9.42210        | -6.13720 | -0.60790 |
| C    | 10.71070       | -6.76600 | -0.20820 |
| C    | 11.84120       | -5.75270 | -0.44170 |
| O    | 12.79000       | -5.85030 | 0.50050  |
| C    | 13.94630       | -4.97350 | 0.38470  |
| O    | 11.88480       | -4.95170 | -1.36120 |
| O    | 8.85200        | -3.89810 | -0.59670 |
| C    | 10.97560       | -8.12430 | -0.97640 |
| C    | 12.09540       | -8.88950 | -0.23520 |
| C    | 9.69440        | -8.98640 | -0.93490 |
| C    | 11.39240       | -7.90550 | -2.44420 |
| H    | 9.67300        | -2.97160 | 1.86430  |
| H    | 9.00310        | -3.64510 | 3.18590  |
| H    | 8.15670        | -5.51770 | 1.83400  |
| H    | 9.90090        | -5.45450 | 1.96920  |
| H    | 8.65650        | -6.79170 | -0.42210 |
| H    | 10.72440       | -7.02050 | 0.85950  |
| H    | 14.50590       | -5.21110 | -0.52300 |
| H    | 13.62340       | -3.93030 | 0.36530  |
| H    | 14.54640       | -5.17580 | 1.27210  |
| H    | 11.81270       | -9.09900 | 0.80390  |
| H    | 12.27560       | -9.84760 | -0.73580 |
| H    | 13.03960       | -8.33580 | -0.22490 |
| H    | 9.31400        | -9.10450 | 0.08760  |
| H    | 8.89690        | -8.57530 | -1.56410 |
| H    | 9.92390        | -9.98620 | -1.32010 |
| H    | 10.66340       | -7.29680 | -2.98830 |
| H    | 12.37070       | -7.41880 | -2.52170 |
| H    | 11.46790       | -8.87650 | -2.94700 |



|      |                |          |          |
|------|----------------|----------|----------|
| 101. | N0100_Syn-60WP |          |          |
| N    | 8.43000        | -6.11080 | 2.15600  |
| C    | 8.86550        | -4.81040 | 1.61120  |
| C    | 9.10050        | -4.89340 | 0.07700  |
| N    | 9.41830        | -6.12230 | -0.61270 |
| C    | 10.61260       | -6.90130 | -0.26920 |
| C    | 11.93560       | -6.34940 | -0.79750 |
| O    | 11.91770       | -5.04530 | -1.06560 |
| C    | 13.16900       | -4.42370 | -1.48270 |
| O    | 12.93470       | -7.05220 | -0.89780 |
| O    | 8.85500        | -3.90990 | -0.60480 |
| C    | 9.97700        | -4.04340 | 2.44720  |
| C    | 9.39670        | -3.79950 | 3.85890  |
| C    | 10.29500       | -2.67080 | 1.81780  |
| C    | 11.28480       | -4.84810 | 2.58100  |
| H    | 9.20910        | -6.68220 | 2.48870  |
| H    | 7.84000        | -5.94810 | 2.97470  |
| H    | 7.98650        | -4.15580 | 1.65350  |
| H    | 8.58730        | -6.72100 | -0.62770 |
| H    | 10.49950       | -7.89770 | -0.70650 |
| H    | 10.76970       | -7.05730 | 0.80910  |
| H    | 13.93270       | -4.57080 | -0.71480 |
| H    | 13.49990       | -4.85060 | -2.43270 |
| H    | 12.93550       | -3.36510 | -1.59660 |
| H    | 9.19800        | -4.73670 | 4.38850  |
| H    | 10.11020       | -3.22520 | 4.46080  |
| H    | 8.46150        | -3.22930 | 3.80960  |
| H    | 9.38940        | -2.06450 | 1.70320  |
| H    | 10.98710       | -2.12460 | 2.47030  |
| H    | 10.76730       | -2.76030 | 0.83520  |
| H    | 11.80810       | -4.93770 | 1.62480  |
| H    | 11.96440       | -4.33410 | 3.27060  |
| H    | 11.11900       | -5.85280 | 2.98700  |

|      |                |          |          |
|------|----------------|----------|----------|
| 102. | N0110_Syn-60WP |          |          |
| N    | 9.73140        | -3.57460 | 2.02260  |
| C    | 9.05840        | -4.82030 | 1.60580  |
| C    | 9.09980        | -4.89060 | 0.06970  |
| N    | 9.42080        | -6.13180 | -0.61030 |
| C    | 10.75900       | -6.69430 | -0.31680 |
| C    | 11.78620       | -5.98470 | -1.21930 |
| O    | 12.91550       | -5.71070 | -0.54940 |
| C    | 14.00990       | -5.10560 | -1.29370 |
| O    | 11.61750       | -5.70970 | -2.39600 |
| O    | 8.85330        | -3.90310 | -0.60000 |
| C    | 7.57210        | -5.00910 | 2.14420  |
| C    | 6.68580        | -3.79340 | 1.81520  |
| C    | 6.92790        | -6.27730 | 1.54460  |
| C    | 7.65210        | -5.19010 | 3.67570  |
| C    | 10.80280       | -8.26130 | -0.49960 |
| C    | 12.23860       | -8.76050 | -0.22440 |
| C    | 9.86390        | -8.91140 | 0.54220  |
| C    | 10.37290       | -8.69680 | -1.91470 |
| H    | 9.63950        | -3.43940 | 3.03120  |
| H    | 9.28410        | -2.76920 | 1.58140  |
| H    | 9.63710        | -5.65700 | 2.01470  |
| H    | 8.69280        | -6.81970 | -0.41430 |
| H    | 11.06560       | -6.49910 | 0.71940  |
| H    | 14.81670       | -4.98780 | -0.56960 |
| H    | 14.31590       | -5.76550 | -2.10890 |
| H    | 13.70050       | -4.13580 | -1.68950 |
| H    | 5.67960        | -3.95640 | 2.21830  |
| H    | 7.07440        | -2.87220 | 2.26220  |
| H    | 6.59230        | -3.63690 | 0.73570  |
| H    | 5.94770        | -6.44640 | 2.00500  |
| H    | 6.75800        | -6.18930 | 0.46380  |
| H    | 7.53370        | -7.17010 | 1.73690  |
| H    | 6.64750        | -5.34610 | 4.08500  |
| H    | 8.26370        | -6.06100 | 3.93970  |
| H    | 8.07460        | -4.31170 | 4.17610  |
| H    | 12.25040       | -9.85570 | -0.25080 |
| H    | 12.95210       | -8.40580 | -0.97570 |
| H    | 12.59400       | -8.44310 | 0.76310  |
| H    | 9.98350        | -9.99970 | 0.50640  |
| H    | 10.10070       | -8.58190 | 1.56090  |
| H    | 8.80500        | -8.70740 | 0.34650  |
| H    | 9.35040        | -8.38280 | -2.15030 |
| H    | 11.03990       | -8.29340 | -2.68230 |
| H    | 10.40660       | -9.79040 | -1.97980 |

|      |                 |           |          |
|------|-----------------|-----------|----------|
| 103. | N011'0_Syn-60WP |           |          |
| N    | 8.59160         | -6.13220  | 2.18950  |
| C    | 8.88600         | -4.81080  | 1.60910  |
| C    | 9.10080         | -4.89450  | 0.07270  |
| N    | 9.41860         | -6.12330  | -0.61050 |
| C    | 10.68630        | -6.82330  | -0.31780 |
| C    | 10.37020        | -8.32140  | -0.23670 |
| O    | 11.32260        | -9.01560  | 0.39050  |
| C    | 11.16850        | -10.46240 | 0.45430  |
| O    | 9.35710         | -8.82880  | -0.69950 |
| O    | 8.85450         | -3.90760  | -0.60270 |
| C    | 9.93810         | -3.92230  | 2.40570  |
| C    | 9.34820         | -3.68100  | 3.81310  |
| C    | 10.14270        | -2.54970  | 1.72990  |
| C    | 11.31150        | -4.60880  | 2.55810  |
| C    | 11.81950        | -6.50570  | -1.39020 |
| C    | 13.19180        | -7.01550  | -0.89830 |
| C    | 11.92300        | -4.97710  | -1.57290 |
| C    | 11.48580        | -7.14510  | -2.75050 |
| H    | 8.01680         | -6.01350  | 3.02740  |
| H    | 9.43250         | -6.62010  | 2.49970  |
| H    | 7.94890         | -4.24300  | 1.65880  |
| H    | 8.62750         | -6.76360  | -0.50800 |
| H    | 12.04530        | -10.81530 | 0.99630  |
| H    | 10.25130        | -10.71660 | 0.98950  |
| H    | 11.14490        | -10.87900 | -0.55550 |
| H    | 10.01050        | -3.02330  | 4.38780  |
| H    | 8.36440         | -3.19970  | 3.75250  |
| H    | 9.24040         | -4.61340  | 4.37580  |
| H    | 10.77420        | -1.92100  | 2.36950  |
| H    | 10.63780        | -2.63250  | 0.75910  |
| H    | 9.18960         | -2.03140  | 1.57980  |
| H    | 11.83850        | -4.69800  | 1.60170  |
| H    | 11.94980        | -4.00730  | 3.21620  |
| H    | 11.23720        | -5.60600  | 3.00990  |
| H    | 13.96530        | -6.69520  | -1.60590 |
| H    | 13.44930        | -6.59940  | 0.08350  |
| H    | 13.23450        | -8.10530  | -0.82450 |
| H    | 12.73720        | -4.75380  | -2.27190 |
| H    | 11.00240        | -4.55320  | -1.97960 |
| H    | 12.15610        | -4.46700  | -0.63030 |
| H    | 12.22780        | -6.83550  | -3.49540 |
| H    | 11.50310        | -8.23980  | -2.70670 |
| H    | 10.50030        | -6.82830  | -3.10420 |
| H    | 11.09560        | -6.53390  | 0.65780  |

|      |                |           |          |
|------|----------------|-----------|----------|
| 104. | N1000_Syn-60WP |           |          |
| N    | 8.70230        | -6.06730  | 2.21800  |
| C    | 9.13750        | -4.82200  | 1.59040  |
| C    | 9.10040        | -4.89290  | 0.06590  |
| N    | 9.42080        | -6.13200  | -0.60790 |
| C    | 10.78050       | -6.62490  | -0.29400 |
| C    | 11.02520       | -7.94260  | -1.01130 |
| O    | 12.33180       | -8.22130  | -1.08770 |
| C    | 12.71570       | -9.48650  | -1.70320 |
| O    | 10.14550       | -8.67620  | -1.43760 |
| O    | 8.85260        | -3.90060  | -0.59840 |
| C    | 8.98470        | -6.23710  | 3.67260  |
| C    | 8.34060        | -7.57400  | 4.07760  |
| C    | 8.38420        | -5.10040  | 4.53050  |
| C    | 10.50420       | -6.32000  | 3.90750  |
| H    | 7.69490        | -6.17310  | 2.07650  |
| H    | 10.19020       | -4.62370  | 1.84110  |
| H    | 8.57320        | -3.92280  | 1.87930  |
| H    | 8.76400        | -6.83710  | -0.24900 |
| H    | 10.93960       | -6.80740  | 0.78060  |
| H    | 11.52870       | -5.89350  | -0.62380 |
| H    | 12.25660       | -10.31970 | -1.16490 |
| H    | 12.41030       | -9.49750  | -2.75410 |
| H    | 13.80190       | -9.52500  | -1.61910 |
| H    | 7.25710        | -7.55210  | 3.91130  |
| H    | 8.76360        | -8.39760  | 3.49260  |
| H    | 8.51450        | -7.77620  | 5.14080  |
| H    | 8.54520        | -5.30080  | 5.59640  |
| H    | 8.84450        | -4.13190  | 4.30370  |
| H    | 7.30350        | -5.01670  | 4.36180  |
| H    | 10.70090       | -6.53360  | 4.96440  |
| H    | 10.94830       | -7.12240  | 3.30850  |
| H    | 11.01580       | -5.38010  | 3.67020  |

|      |                |           |          |
|------|----------------|-----------|----------|
| 105. | N1010_Syn-60WP |           |          |
| N    | 8.17350        | -5.93790  | 2.09960  |
| C    | 9.02550        | -4.85700  | 1.59450  |
| C    | 9.10060        | -4.89340  | 0.06520  |
| N    | 9.42080        | -6.13190  | -0.60750 |
| C    | 10.66440       | -6.79840  | -0.14920 |
| C    | 11.86420       | -5.90310  | -0.49010 |
| O    | 12.79920       | -5.96210  | 0.46860  |
| C    | 14.03150       | -5.21940  | 0.26070  |
| O    | 11.97360       | -5.22500  | -1.49880 |
| O    | 8.85250        | -3.90020  | -0.59820 |
| C    | 10.80600       | -8.23900  | -0.78150 |
| C    | 9.58100        | -9.08150  | -0.36120 |
| C    | 10.89250       | -8.19200  | -2.31780 |
| C    | 12.07120       | -8.92410  | -0.21910 |
| C    | 8.33200        | -6.31460  | 3.53720  |
| C    | 7.18710        | -7.29440  | 3.84890  |
| C    | 9.67820        | -7.03340  | 3.74640  |
| C    | 8.24030        | -5.09740  | 4.48440  |
| H    | 7.19750        | -5.67420  | 1.94450  |
| H    | 10.04670       | -4.98090  | 1.97910  |
| H    | 8.70430        | -3.84450  | 1.87400  |
| H    | 8.63340        | -6.76030  | -0.43210 |
| H    | 10.67350       | -6.94310  | 0.93740  |
| H    | 14.52600       | -5.56050  | -0.65250 |
| H    | 13.81580       | -4.15000  | 0.19610  |
| H    | 14.64610       | -5.43690  | 1.13510  |
| H    | 9.71500        | -10.11260 | -0.70680 |
| H    | 9.46390        | -9.10600  | 0.72700  |
| H    | 8.64620        | -8.71850  | -0.80200 |
| H    | 10.93530       | -9.21450  | -2.70920 |
| H    | 10.02130       | -7.69670  | -2.75660 |
| H    | 11.79080       | -7.66700  | -2.65690 |
| H    | 12.99110       | -8.41920  | -0.53040 |
| H    | 12.05800       | -8.96230  | 0.87660  |
| H    | 12.11790       | -9.95430  | -0.59040 |
| H    | 7.24940        | -7.63660  | 4.88780  |
| H    | 6.21040        | -6.81300  | 3.70940  |
| H    | 7.23750        | -8.17020  | 3.19220  |
| H    | 9.76720        | -7.35890  | 4.78900  |
| H    | 9.74850        | -7.91910  | 3.10610  |
| H    | 10.53640       | -6.38270  | 3.54070  |
| H    | 7.29400        | -4.56160  | 4.34070  |
| H    | 8.29020        | -5.42440  | 5.52920  |
| H    | 9.06380        | -4.39250  | 4.32140  |

|      |                |           |          |
|------|----------------|-----------|----------|
| 106. | N1100_Syn-60WP |           |          |
| N    | 9.23740        | -3.48550  | 2.13280  |
| C    | 8.99830        | -4.83280  | 1.61730  |
| C    | 9.09970        | -4.89020  | 0.07610  |
| N    | 9.41970        | -6.12760  | -0.61320 |
| C    | 10.72480       | -6.75150  | -0.34060 |
| C    | 10.70780       | -8.17150  | -0.88890 |
| O    | 11.93740       | -8.67690  | -1.00310 |
| C    | 12.05240       | -10.05660 | -1.46040 |
| O    | 9.68570        | -8.78310  | -1.16030 |
| O    | 8.85450        | -3.90760  | -0.60340 |
| C    | 7.59180        | -5.37300  | 2.14650  |
| C    | 6.45810        | -4.39550  | 1.78410  |
| C    | 7.70300        | -5.48190  | 3.68160  |
| C    | 7.24740        | -6.77180  | 1.59490  |
| C    | 10.60770       | -3.05510  | 2.51760  |
| C    | 11.63310       | -3.16030  | 1.36550  |
| C    | 10.47420       | -1.57860  | 2.93720  |
| C    | 11.09740       | -3.87240  | 3.72770  |
| H    | 8.85060        | -2.80770  | 1.47820  |
| H    | 9.74380        | -5.52080  | 2.03030  |
| H    | 8.68650        | -6.81640  | -0.43830 |
| H    | 10.97620       | -6.83900  | 0.72970  |
| H    | 11.53070       | -6.18790  | -0.82270 |
| H    | 11.56050       | -10.72470 | -0.75030 |
| H    | 11.60250       | -10.15700 | -2.44970 |
| H    | 13.12320       | -10.25430 | -1.50070 |
| H    | 5.50670        | -4.77070  | 2.17940  |
| H    | 6.63400        | -3.40630  | 2.21710  |
| H    | 6.34590        | -4.28450  | 0.69940  |
| H    | 6.74280        | -5.80150  | 4.10360  |
| H    | 8.46100        | -6.22010  | 3.97100  |
| H    | 7.97420        | -4.51960  | 4.12130  |
| H    | 8.07380        | -7.48000  | 1.73180  |
| H    | 6.38390        | -7.17300  | 2.13780  |
| H    | 6.96050        | -6.74980  | 0.53630  |
| H    | 12.61010       | -2.77840  | 1.68410  |
| H    | 11.78050       | -4.19930  | 1.04840  |
| H    | 11.30620       | -2.57780  | 0.49670  |
| H    | 11.44410       | -1.17810  | 3.25160  |
| H    | 10.11080       | -0.96480  | 2.10320  |
| H    | 9.76920        | -1.47840  | 3.76940  |
| H    | 10.39300       | -3.78540  | 4.56160  |
| H    | 11.21960       | -4.93520  | 3.48960  |
| H    | 12.07280       | -3.49800  | 4.05860  |

|      |                |           |          |
|------|----------------|-----------|----------|
| 107. | N1110_Syn-60WP |           |          |
| N    | 8.44740        | -6.05280  | 2.19810  |
| C    | 8.89920        | -4.78590  | 1.62950  |
| C    | 9.09990        | -4.89110  | 0.08030  |
| N    | 9.41890        | -6.12430  | -0.61480 |
| C    | 10.64810       | -6.84580  | -0.23590 |
| C    | 11.83870       | -6.15320  | -0.92630 |
| O    | 12.91990       | -6.13420  | -0.13410 |
| C    | 14.14840       | -5.57560  | -0.67460 |
| O    | 11.82410       | -5.68160  | -2.05290 |
| O    | 8.85510        | -3.91010  | -0.60600 |
| C    | 10.07100       | -4.09080  | 2.45150  |
| C    | 11.22920       | -5.03860  | 2.82910  |
| C    | 9.45720        | -3.54960  | 3.76480  |
| C    | 10.64540       | -2.89190  | 1.66950  |
| C    | 10.57900       | -8.37800  | -0.61910 |
| C    | 9.46800        | -9.05160  | 0.21490  |
| C    | 10.29410       | -8.59270  | -2.11810 |
| C    | 11.91770       | -9.05540  | -0.25240 |
| C    | 6.99130        | -6.26530  | 2.44700  |
| C    | 6.22060        | -6.23160  | 1.11480  |
| C    | 6.86550        | -7.66350  | 3.07720  |
| C    | 6.37330        | -5.23000  | 3.41620  |
| H    | 8.96050        | -6.28570  | 3.04290  |
| H    | 8.09440        | -4.03990  | 1.66630  |
| H    | 8.61360        | -6.74240  | -0.50500 |
| H    | 10.82750       | -6.81440  | 0.84300  |
| H    | 14.87490       | -5.64930  | 0.13540  |
| H    | 14.47490       | -6.15770  | -1.54030 |
| H    | 13.99290       | -4.53310  | -0.96110 |
| H    | 11.91950       | -4.50320  | 3.49150  |
| H    | 10.89360       | -5.92730  | 3.37680  |
| H    | 11.80730       | -5.36530  | 1.96230  |
| H    | 10.23060       | -3.03060  | 4.34230  |
| H    | 8.64900        | -2.83650  | 3.56720  |
| H    | 9.05920        | -4.35080  | 4.39550  |
| H    | 9.86110        | -2.17900  | 1.39430  |
| H    | 11.37490       | -2.36800  | 2.29750  |
| H    | 11.15950       | -3.19630  | 0.75210  |
| H    | 9.48360        | -10.13130 | 0.02930  |
| H    | 9.61390        | -8.88450  | 1.28620  |
| H    | 8.46530        | -8.69980  | -0.04930 |
| H    | 10.24390       | -9.66780  | -2.32510 |
| H    | 9.33990        | -8.15060  | -2.42060 |
| H    | 11.08210       | -8.16690  | -2.74570 |
| H    | 12.74700       | -8.70040  | -0.87180 |
| H    | 12.18020       | -8.88610  | 0.79810  |
| H    | 11.82910       | -10.13640 | -0.40730 |
| H    | 5.15730        | -6.42430  | 1.29360  |

|   |         |          |         |
|---|---------|----------|---------|
| H | 6.29350 | -5.25570 | 0.62100 |
| H | 6.58620 | -7.00110 | 0.42620 |
| H | 5.81610 | -7.89380 | 3.29100 |
| H | 7.26120 | -8.43140 | 2.40580 |
| H | 7.41980 | -7.71500 | 4.02300 |
| H | 6.44310 | -4.20750 | 3.02980 |
| H | 5.31040 | -5.44780 | 3.57140 |
| H | 6.87010 | -5.26310 | 4.39200 |



|      |                 |           |          |
|------|-----------------|-----------|----------|
| 108. | N111'0_Syn-60WP |           |          |
| N    | 9.31220         | -3.52350  | 2.16350  |
| C    | 8.99280         | -4.83930  | 1.61090  |
| C    | 9.10020         | -4.89190  | 0.06920  |
| N    | 9.42050         | -6.13080  | -0.60970 |
| C    | 10.76770        | -6.70270  | -0.39160 |
| C    | 10.61960        | -8.11830  | 0.18030  |
| O    | 11.64420        | -8.47010  | 0.96210  |
| C    | 11.64740        | -9.82440  | 1.50170  |
| O    | 9.66440         | -8.84670  | -0.05160 |
| O    | 8.85320         | -3.90280  | -0.60000 |
| C    | 7.53940         | -5.28800  | 2.10020  |
| C    | 7.07990         | -6.61640  | 1.46610  |
| C    | 6.49870         | -4.19880  | 1.77950  |
| C    | 7.61820         | -5.48740  | 3.62750  |
| C    | 11.64490        | -6.67180  | -1.70920 |
| C    | 13.07240        | -7.18010  | -1.41800 |
| C    | 11.00300        | -7.52620  | -2.81700 |
| C    | 11.73920        | -5.20670  | -2.18180 |
| C    | 10.68530        | -3.17310  | 2.61540  |
| C    | 11.12980        | -4.10630  | 3.75640  |
| C    | 11.73830        | -3.19630  | 1.48440  |
| C    | 10.58130        | -1.73640  | 3.16310  |
| H    | 8.97820         | -2.80260  | 1.52670  |
| H    | 9.68660         | -5.58140  | 2.01850  |
| H    | 8.69970         | -6.83890  | -0.47410 |
| H    | 10.77710        | -9.97240  | 2.14510  |
| H    | 11.64020        | -10.55050 | 0.68570  |
| H    | 12.57060        | -9.89830  | 2.07680  |
| H    | 6.15190         | -6.94400  | 1.94880  |
| H    | 6.85650         | -6.51840  | 0.39660  |
| H    | 7.81600         | -7.41670  | 1.60360  |
| H    | 5.51430         | -4.51450  | 2.14410  |
| H    | 6.75050         | -3.25330  | 2.26790  |
| H    | 6.41240         | -4.02180  | 0.70160  |
| H    | 7.96540         | -4.57680  | 4.12160  |
| H    | 6.62750         | -5.74270  | 4.02170  |
| H    | 8.30260         | -6.30510  | 3.88720  |
| H    | 13.69660        | -7.02840  | -2.30620 |
| H    | 13.53370        | -6.63070  | -0.58810 |
| H    | 13.09680        | -8.24650  | -1.17410 |
| H    | 11.58520        | -7.42950  | -3.74030 |
| H    | 10.97640        | -8.58890  | -2.55090 |
| H    | 9.97990         | -7.19870  | -3.02750 |
| H    | 10.75250        | -4.78720  | -2.39310 |
| H    | 12.23020        | -4.57400  | -1.43270 |
| H    | 12.33610        | -5.15690  | -3.09940 |
| H    | 12.09970        | -3.77610  | 4.14490  |
| H    | 10.40540        | -4.08870  | 4.57710  |

|   |          |          |         |
|---|----------|----------|---------|
| H | 11.25280 | -5.14390 | 3.42560 |
| H | 12.70960 | -2.84680 | 1.85420 |
| H | 11.89120 | -4.20790 | 1.09440 |
| H | 11.43520 | -2.54810 | 0.65430 |
| H | 9.86500  | -1.69190 | 3.99010 |
| H | 11.55620 | -1.39110 | 3.52500 |
| H | 10.24720 | -1.04280 | 2.38130 |
| H | 11.31290 | -6.11520 | 0.35530 |

|      |               |          |          |
|------|---------------|----------|----------|
| 109. | N0000_Syn60WP |          |          |
| N    | 8.68940       | -3.67040 | 2.21040  |
| C    | 9.25600       | -4.86710 | 1.57310  |
| C    | 9.09970       | -4.88990 | 0.06310  |
| N    | 9.42250       | -6.13870 | -0.60760 |
| C    | 8.58610       | -7.32170 | -0.30430 |
| C    | 7.09710       | -7.02620 | -0.30350 |
| O    | 6.38410       | -8.15480 | -0.19690 |
| C    | 4.94190       | -8.02470 | -0.03570 |
| O    | 6.60270       | -5.91070 | -0.33890 |
| O    | 8.85170       | -3.89680 | -0.59610 |
| H    | 8.81110       | -3.75500 | 3.22300  |
| H    | 7.67740       | -3.65190 | 2.06110  |
| H    | 8.86250       | -5.80870 | 1.98120  |
| H    | 10.34390      | -4.89950 | 1.74270  |
| H    | 10.40300      | -6.37040 | -0.41360 |
| H    | 8.80750       | -7.77760 | 0.67390  |
| H    | 8.78670       | -8.09100 | -1.05870 |
| H    | 4.58030       | -9.04290 | 0.10830  |
| H    | 4.72040       | -7.40970 | 0.83920  |
| H    | 4.50120       | -7.58070 | -0.93080 |

|      |               |           |          |
|------|---------------|-----------|----------|
| 110. | N0010_Syn60WP |           |          |
| N    | 9.43720       | -5.86300  | 2.44560  |
| C    | 9.19510       | -4.69300  | 1.59450  |
| C    | 9.10120       | -4.89600  | 0.07430  |
| N    | 9.41820       | -6.12180  | -0.61080 |
| C    | 8.69850       | -7.39030  | -0.32470 |
| C    | 9.40950       | -8.46430  | -1.16280 |
| O    | 9.50240       | -9.62680  | -0.50380 |
| C    | 10.06260      | -10.75910 | -1.22590 |
| O    | 9.83530       | -8.30080  | -2.29620 |
| O    | 8.85450       | -3.90770  | -0.60400 |
| C    | 7.14890       | -7.35350  | -0.65890 |
| C    | 6.56320       | -8.77590  | -0.49020 |
| C    | 6.41450       | -6.43940  | 0.34930  |
| C    | 6.86720       | -6.86260  | -2.09170 |
| H    | 8.55490       | -6.27650  | 2.75140  |
| H    | 9.89040       | -5.54840  | 3.30550  |
| H    | 10.04400      | -4.00360  | 1.69680  |
| H    | 8.30750       | -4.10950  | 1.87630  |
| H    | 10.43130      | -6.26220  | -0.52330 |
| H    | 8.79000       | -7.69420  | 0.72380  |
| H    | 9.44960       | -10.98030 | -2.10340 |
| H    | 11.08840      | -10.53950 | -1.53010 |
| H    | 10.03680      | -11.58920 | -0.51970 |
| H    | 6.78850       | -9.19360  | 0.49790  |
| H    | 5.47340       | -8.72880  | -0.59380 |
| H    | 6.93370       | -9.47250  | -1.24950 |
| H    | 6.59770       | -6.74760  | 1.38590  |
| H    | 6.67110       | -5.38150  | 0.24110  |
| H    | 5.33470       | -6.51260  | 0.17520  |
| H    | 7.23570       | -5.84590  | -2.25560 |
| H    | 7.32400       | -7.51800  | -2.84020 |
| H    | 5.78410       | -6.86200  | -2.26410 |

|      |               |           |          |
|------|---------------|-----------|----------|
| 111. | N0100_Syn60WP |           |          |
| N    | 10.28390      | -3.86070  | 1.87320  |
| C    | 9.15560       | -4.79030  | 1.61480  |
| C    | 9.09950       | -4.88940  | 0.07340  |
| N    | 9.42040       | -6.13020  | -0.61220 |
| C    | 8.53110       | -7.27410  | -0.34480 |
| C    | 8.50340       | -8.25200  | -1.51750 |
| O    | 7.58620       | -9.20600  | -1.29610 |
| C    | 7.38780       | -10.21670 | -2.32540 |
| O    | 9.19630       | -8.19330  | -2.51930 |
| O    | 8.85400       | -3.90580  | -0.60170 |
| C    | 7.79500       | -4.42070  | 2.32830  |
| C    | 8.06540       | -4.43000  | 3.84990  |
| C    | 6.72310       | -5.48700  | 2.02300  |
| C    | 7.24880       | -3.03730  | 1.92400  |
| H    | 10.03960      | -2.91540  | 1.56940  |
| H    | 10.47390      | -3.80460  | 2.87510  |
| H    | 9.45880       | -5.77010  | 2.00420  |
| H    | 10.38210      | -6.38210  | -0.35040 |
| H    | 7.50070       | -6.92600  | -0.22720 |
| H    | 8.78550       | -7.84420  | 0.55980  |
| H    | 6.99900       | -9.74930  | -3.23340 |
| H    | 8.32710       | -10.73200 | -2.53540 |
| H    | 6.65420       | -10.90730 | -1.90800 |
| H    | 8.74890       | -3.62860  | 4.15060  |
| H    | 7.12720       | -4.27950  | 4.39540  |
| H    | 8.49450       | -5.38640  | 4.17190  |
| H    | 7.07890       | -6.49600  | 2.26040  |
| H    | 5.83040       | -5.29950  | 2.63120  |
| H    | 6.40560       | -5.46110  | 0.97380  |
| H    | 6.94650       | -3.00920  | 0.87350  |
| H    | 6.36710       | -2.80710  | 2.53420  |
| H    | 7.98020       | -2.23880  | 2.09110  |

|      |               |           |          |
|------|---------------|-----------|----------|
| 112. | N0110_Syn60WP |           |          |
| N    | 10.57690      | -4.17890  | 1.79730  |
| C    | 9.24890       | -4.80750  | 1.60670  |
| C    | 9.10010       | -4.89180  | 0.06710  |
| N    | 9.42060       | -6.13120  | -0.60880 |
| C    | 8.56090       | -7.30570  | -0.32060 |
| C    | 9.49230       | -8.49270  | -0.03370 |
| O    | 8.86690       | -9.51620  | 0.54610  |
| C    | 9.64260       | -10.72170 | 0.80470  |
| O    | 10.68510      | -8.49760  | -0.30740 |
| O    | 8.85310       | -3.90250  | -0.59880 |
| C    | 8.04330       | -4.15230  | 2.37760  |
| C    | 7.83180       | -2.66410  | 2.03280  |
| C    | 6.74770       | -4.93160  | 2.06760  |
| C    | 8.33610       | -4.28110  | 3.88850  |
| C    | 7.52560       | -7.60690  | -1.48690 |
| C    | 6.47530       | -8.64380  | -1.02910 |
| C    | 6.77240       | -6.30720  | -1.83740 |
| C    | 8.25000       | -8.12190  | -2.74440 |
| H    | 10.86680      | -4.25220  | 2.77400  |
| H    | 10.54260      | -3.18290  | 1.57160  |
| H    | 9.34000       | -5.83170  | 1.98900  |
| H    | 10.39670      | -6.36580  | -0.40030 |
| H    | 7.96870       | -7.14890  | 0.59110  |
| H    | 8.93820       | -11.41840 | 1.25900  |
| H    | 10.03070      | -11.12220 | -0.13430 |
| H    | 10.46360      | -10.49680 | 1.48870  |
| H    | 7.04270       | -2.25170  | 2.67320  |
| H    | 8.73720       | -2.07100  | 2.20760  |
| H    | 7.53140       | -2.52740  | 0.99120  |
| H    | 5.91990       | -4.54000  | 2.67080  |
| H    | 6.45360       | -4.83450  | 1.01680  |
| H    | 6.85040       | -5.99760  | 2.30790  |
| H    | 7.48590       | -3.90420  | 4.46810  |
| H    | 8.50100       | -5.32750  | 4.17280  |
| H    | 9.21760       | -3.70180  | 4.18500  |
| H    | 5.70350       | -8.73460  | -1.80250 |
| H    | 6.90400       | -9.63510  | -0.86620 |
| H    | 5.97970       | -8.32990  | -0.10180 |
| H    | 6.04600       | -6.51710  | -2.63060 |
| H    | 6.21350       | -5.91920  | -0.97780 |
| H    | 7.44730       | -5.52600  | -2.19340 |
| H    | 9.01560       | -7.41470  | -3.07940 |
| H    | 8.72740       | -9.09430  | -2.57450 |
| H    | 7.52840       | -8.24940  | -3.55940 |

|      |                |           |          |
|------|----------------|-----------|----------|
| 113. | N011'0_Syn60WP |           |          |
| N    | 10.47560       | -3.94890  | 1.78440  |
| C    | 9.26230        | -4.78170  | 1.60790  |
| C    | 9.09980        | -4.89050  | 0.07100  |
| N    | 9.42040        | -6.13020  | -0.61090 |
| C    | 8.71010        | -7.35760  | -0.19660 |
| C    | 7.26040        | -7.29030  | -0.71150 |
| O    | 6.45360        | -8.08450  | 0.00350  |
| C    | 5.06060        | -8.18860  | -0.40200 |
| O    | 6.87870        | -6.61550  | -1.65440 |
| O    | 8.85370        | -3.90480  | -0.60060 |
| C    | 7.97730        | -4.31240  | 2.38880  |
| C    | 8.30030        | -4.37820  | 3.89740  |
| C    | 6.81340        | -5.28150  | 2.09720  |
| C    | 7.53860        | -2.88000  | 2.02650  |
| C    | 9.44270        | -8.66450  | -0.72090 |
| C    | 8.92220        | -9.89220  | 0.06080  |
| C    | 10.95920       | -8.54680  | -0.44840 |
| C    | 9.21030        | -8.88070  | -2.23070 |
| H    | 10.75350       | -3.94010  | 2.76750  |
| H    | 10.28750       | -2.97900  | 1.52330  |
| H    | 9.51560        | -5.77530  | 1.99740  |
| H    | 10.43160       | -6.25200  | -0.51560 |
| H    | 4.60960        | -8.88210  | 0.30850  |
| H    | 4.57710        | -7.21050  | -0.34450 |
| H    | 4.99350        | -8.58220  | -1.41900 |
| H    | 7.40600        | -4.13490  | 4.48210  |
| H    | 8.63070        | -5.38280  | 4.18820  |
| H    | 9.08220        | -3.66530  | 4.18200  |
| H    | 5.94220        | -5.01740  | 2.70780  |
| H    | 6.49470        | -5.23170  | 1.04920  |
| H    | 7.07970        | -6.31740  | 2.33580  |
| H    | 7.21760        | -2.80530  | 0.98410  |
| H    | 6.69420        | -2.58850  | 2.66240  |
| H    | 8.34010        | -2.15070  | 2.19050  |
| H    | 9.46120        | -10.78550 | -0.27440 |
| H    | 9.09440        | -9.77900  | 1.13880  |
| H    | 7.85440        | -10.06470 | -0.09720 |
| H    | 11.43420       | -9.51020  | -0.66270 |
| H    | 11.45040       | -7.80650  | -1.09120 |
| H    | 11.16580       | -8.29970  | 0.60050  |
| H    | 9.80790        | -9.73250  | -2.57370 |
| H    | 8.16080        | -9.10750  | -2.45250 |
| H    | 9.50200        | -8.00330  | -2.81770 |
| H    | 8.65610        | -7.45530  | 0.89720  |

|      |               |           |          |
|------|---------------|-----------|----------|
| 114. | N1010_Syn60WP |           |          |
| N    | 7.67970       | -4.98440  | 1.99850  |
| C    | 9.08620       | -4.83010  | 1.59140  |
| C    | 9.10060       | -4.89330  | 0.06090  |
| N    | 9.42190       | -6.13640  | -0.60560 |
| C    | 8.44620       | -7.27090  | -0.47690 |
| C    | 9.26950       | -8.54840  | -0.68220 |
| O    | 8.82720       | -9.55950  | 0.07210  |
| C    | 9.47590       | -10.85260 | -0.09780 |
| O    | 10.22210      | -8.64810  | -1.44280 |
| O    | 8.85140       | -3.89580  | -0.59580 |
| C    | 7.21770       | -7.20600  | -1.47590 |
| C    | 6.34630       | -5.97250  | -1.15750 |
| C    | 7.67030       | -7.13720  | -2.94540 |
| C    | 6.33340       | -8.45920  | -1.27040 |
| C    | 7.40200       | -5.23400  | 3.44240  |
| C    | 5.87210       | -5.15960  | 3.59740  |
| C    | 7.87640       | -6.64660  | 3.82720  |
| C    | 8.06160       | -4.18260  | 4.36030  |
| H    | 7.17240       | -4.14620  | 1.71360  |
| H    | 9.68350       | -5.64730  | 2.00590  |
| H    | 9.54490       | -3.87820  | 1.89680  |
| H    | 10.29630      | -6.45450  | -0.17200 |
| H    | 8.02710       | -7.31480  | 0.53510  |
| H    | 9.36010       | -11.19620 | -1.12680 |
| H    | 10.53520      | -10.77570 | 0.15330  |
| H    | 8.96230       | -11.52270 | 0.59170  |
| H    | 5.42190       | -6.03190  | -1.74310 |
| H    | 6.08150       | -5.93090  | -0.09590 |
| H    | 6.84410       | -5.03730  | -1.42280 |
| H    | 6.78920       | -7.06320  | -3.59240 |
| H    | 8.29800       | -6.25880  | -3.12710 |
| H    | 8.22900       | -8.02770  | -3.24550 |
| H    | 6.83020       | -9.38260  | -1.58910 |
| H    | 6.03500       | -8.57850  | -0.22270 |
| H    | 5.42260       | -8.35310  | -1.86740 |
| H    | 5.58340       | -5.35280  | 4.63640  |
| H    | 5.49830       | -4.16580  | 3.32240  |
| H    | 5.38160       | -5.90160  | 2.95650  |
| H    | 7.60990       | -6.86200  | 4.86890  |
| H    | 7.39950       | -7.39850  | 3.19090  |
| H    | 8.96500       | -6.75440  | 3.73810  |
| H    | 7.74140       | -3.17230  | 4.08790  |
| H    | 7.77950       | -4.35230  | 5.40560  |
| H    | 9.15490       | -4.22330  | 4.30020  |



|      |               |           |          |
|------|---------------|-----------|----------|
| 115. | N1100_Syn60WP |           |          |
| N    | 10.28870      | -3.85040  | 1.98440  |
| C    | 9.19820       | -4.76660  | 1.62290  |
| C    | 9.09930       | -4.88900  | 0.07970  |
| N    | 9.42000       | -6.12860  | -0.61510 |
| C    | 8.57750       | -7.30910  | -0.39750 |
| C    | 9.07520       | -8.28300  | 0.66960  |
| O    | 8.17560       | -9.24790  | 0.90400  |
| C    | 8.54880       | -10.31030 | 1.82920  |
| O    | 10.16870      | -8.22440  | 1.20800  |
| O    | 8.85460       | -3.90800  | -0.60500 |
| C    | 7.84320       | -4.31780  | 2.31040  |
| C    | 7.55360       | -2.81770  | 2.10280  |
| C    | 7.98440       | -4.58490  | 3.82400  |
| C    | 6.65450       | -5.14180  | 1.77590  |
| C    | 11.66170      | -4.31740  | 2.30590  |
| C    | 12.37460      | -5.00140  | 1.11800  |
| C    | 12.44300      | -3.04780  | 2.69740  |
| C    | 11.63350      | -5.27340  | 3.51260  |
| H    | 10.32400      | -3.05810  | 1.34610  |
| H    | 9.43930       | -5.75680  | 2.01510  |
| H    | 10.40980      | -6.35860  | -0.51210 |
| H    | 8.52700       | -7.88950  | -1.32970 |
| H    | 7.54750       | -7.01620  | -0.17850 |
| H    | 9.42910       | -10.83700 | 1.45480  |
| H    | 8.74970       | -9.89230  | 2.81760  |
| H    | 7.68640       | -10.97600 | 1.86070  |
| H    | 6.63620       | -2.54630  | 2.64010  |
| H    | 8.36700       | -2.20230  | 2.50040  |
| H    | 7.41310       | -2.56980  | 1.04680  |
| H    | 7.07850       | -4.25930  | 4.35000  |
| H    | 8.12720       | -5.65310  | 4.03190  |
| H    | 8.83620       | -4.03800  | 4.23910  |
| H    | 6.80660       | -6.21790  | 1.92510  |
| H    | 5.74130       | -4.86800  | 2.31750  |
| H    | 6.46390       | -4.95620  | 0.71180  |
| H    | 13.42460      | -5.20470  | 1.35920  |
| H    | 11.90790      | -5.96210  | 0.87750  |
| H    | 12.34830      | -4.35930  | 0.22970  |
| H    | 13.47370      | -3.30250  | 2.96700  |
| H    | 12.47900      | -2.33540  | 1.86390  |
| H    | 11.97070      | -2.55420  | 3.55300  |
| H    | 11.17010      | -4.79120  | 4.37960  |
| H    | 11.08860      | -6.19880  | 3.29780  |
| H    | 12.65810      | -5.55520  | 3.78040  |

|      |               |           |          |
|------|---------------|-----------|----------|
| 116. | N1110_Syn60WP |           |          |
| N    | 8.25610       | -5.71330  | 2.28160  |
| C    | 9.12790       | -4.73670  | 1.62110  |
| C    | 9.10080       | -4.89440  | 0.07470  |
| N    | 9.41880       | -6.12420  | -0.61140 |
| C    | 8.55340       | -7.31570  | -0.44680 |
| C    | 9.42860       | -8.49150  | -0.00430 |
| O    | 8.74350       | -9.42230  | 0.66450  |
| C    | 9.46070       | -10.61650 | 1.08540  |
| O    | 10.62800      | -8.57710  | -0.23890 |
| O    | 8.85430       | -3.90690  | -0.60380 |
| C    | 10.60270      | -4.69280  | 2.19210  |
| C    | 11.47490      | -3.78760  | 1.29660  |
| C    | 11.26480      | -6.08250  | 2.30300  |
| C    | 10.55080      | -4.06410  | 3.60270  |
| C    | 7.74090       | -7.63970  | -1.76760 |
| C    | 6.94190       | -6.37970  | -2.16130 |
| C    | 8.68430       | -8.02000  | -2.92250 |
| C    | 6.73570       | -8.78370  | -1.51680 |
| C    | 6.92590       | -5.27640  | 2.79970  |
| C    | 6.05330       | -4.75180  | 1.64570  |
| C    | 6.27230       | -6.53440  | 3.39990  |
| C    | 7.02020       | -4.19180  | 3.89750  |
| H    | 8.74850       | -6.20860  | 3.01960  |
| H    | 8.74120       | -3.72100  | 1.76710  |
| H    | 10.40310      | -6.36970  | -0.49560 |
| H    | 7.83490       | -7.13810  | 0.35540  |
| H    | 8.71370       | -11.23520 | 1.58470  |
| H    | 9.87210       | -11.13300 | 0.21540  |
| H    | 10.26320      | -10.34840 | 1.77670  |
| H    | 12.46280      | -3.65950  | 1.75250  |
| H    | 11.62990      | -4.21200  | 0.29780  |
| H    | 11.02610      | -2.79510  | 1.17650  |
| H    | 12.25490      | -5.96760  | 2.75870  |
| H    | 10.69920      | -6.77160  | 2.94110  |
| H    | 11.40950      | -6.56370  | 1.33220  |
| H    | 9.95850       | -4.66500  | 4.30030  |
| H    | 11.56630      | -3.99190  | 4.00920  |
| H    | 10.12560      | -3.05410  | 3.57500  |
| H    | 6.35680       | -6.58370  | -3.06470 |
| H    | 6.23860       | -6.08780  | -1.37250 |
| H    | 7.59990       | -5.53200  | -2.36470 |
| H    | 8.10800       | -8.15170  | -3.84510 |
| H    | 9.42700       | -7.23520  | -3.09910 |
| H    | 9.21470       | -8.95890  | -2.72540 |
| H    | 7.22780       | -9.74130  | -1.32390 |
| H    | 6.08040       | -8.56200  | -0.66570 |
| H    | 6.10120       | -8.90580  | -2.40250 |
| H    | 5.06170       | -4.48100  | 2.02440  |

|   |         |          |         |
|---|---------|----------|---------|
| H | 6.48080 | -3.85770 | 1.17900 |
| H | 5.91960 | -5.51600 | 0.87390 |
| H | 5.28390 | -6.29460 | 3.80750 |
| H | 6.15540 | -7.31300 | 2.63920 |
| H | 6.88290 | -6.94100 | 4.21620 |
| H | 7.48700 | -3.27220 | 3.52790 |
| H | 6.01690 | -3.92990 | 4.25380 |
| H | 7.59990 | -4.55170 | 4.75480 |

|      |                |           |          |
|------|----------------|-----------|----------|
| 117. | N111'0_Syn60WP |           |          |
| N    | 10.21000       | -3.79510  | 1.97670  |
| C    | 9.17130        | -4.77890  | 1.62360  |
| C    | 9.09910        | -4.88780  | 0.07710  |
| N    | 9.42080        | -6.13200  | -0.61430 |
| C    | 8.52370        | -7.28860  | -0.38620 |
| C    | 7.44650        | -7.27870  | -1.48930 |
| O    | 6.23710        | -7.56210  | -0.98840 |
| C    | 5.12080        | -7.64050  | -1.91670 |
| O    | 7.65230        | -7.05320  | -2.67150 |
| O    | 8.85400        | -3.90570  | -0.60330 |
| C    | 7.80240        | -4.40690  | 2.33040  |
| C    | 6.67390        | -5.37470  | 1.92690  |
| C    | 7.36310        | -2.96460  | 2.01040  |
| C    | 8.02420        | -4.53360  | 3.85270  |
| C    | 9.29280        | -8.66420  | -0.33150 |
| C    | 8.26880        | -9.82010  | -0.28170 |
| C    | 10.21960       | -8.85970  | -1.54740 |
| C    | 10.12390       | -8.71590  | 0.97010  |
| C    | 11.61180       | -4.18360  | 2.27740  |
| C    | 11.66260       | -5.04040  | 3.55610  |
| C    | 12.31690       | -4.93180  | 1.12300  |
| C    | 12.35450       | -2.85850  | 2.53470  |
| H    | 10.19710       | -3.01930  | 1.31790  |
| H    | 9.47000        | -5.75540  | 2.01630  |
| H    | 10.37940       | -6.38080  | -0.37070 |
| H    | 4.98750        | -6.68140  | -2.42240 |
| H    | 5.29840        | -8.43130  | -2.64960 |
| H    | 4.25290        | -7.87510  | -1.29940 |
| H    | 5.75350        | -5.10530  | 2.45860  |
| H    | 6.44920        | -5.33580  | 0.85510  |
| H    | 6.90870        | -6.41100  | 2.19940  |
| H    | 6.46090        | -2.72530  | 2.58600  |
| H    | 8.13780        | -2.24380  | 2.28920  |
| H    | 7.13050        | -2.83410  | 0.94960  |
| H    | 8.81250        | -3.85740  | 4.19260  |
| H    | 7.09940        | -4.28220  | 4.38530  |
| H    | 8.30330        | -5.55700  | 4.13340  |
| H    | 8.79970        | -10.76560 | -0.12490 |
| H    | 7.55610        | -9.69300  | 0.54110  |
| H    | 7.70210        | -9.91170  | -1.21440 |
| H    | 10.72010       | -9.83130  | -1.46660 |
| H    | 9.65850        | -8.84490  | -2.48650 |
| H    | 11.00090       | -8.09360  | -1.60580 |
| H    | 10.91070       | -7.95470  | 1.00480  |
| H    | 9.48910        | -8.59580  | 1.85610  |
| H    | 10.62290       | -9.68810  | 1.04720  |
| H    | 12.70330       | -5.28280  | 3.79920  |
| H    | 11.22670       | -4.49920  | 4.40170  |

|   |          |          |         |
|---|----------|----------|---------|
| H | 11.12590 | -5.98880 | 3.44300 |
| H | 13.38300 | -5.06490 | 1.34080 |
| H | 11.89990 | -5.93520 | 0.98260 |
| H | 12.22830 | -4.37670 | 0.18170 |
| H | 11.88180 | -2.30610 | 3.35370 |
| H | 13.39900 | -3.05210 | 2.80110 |
| H | 12.34550 | -2.22400 | 1.63950 |
| H | 7.99270  | -7.20430 | 0.56660 |
